# Supplementary material for: cpubi4 Is Essential for Development and Virulence in Chestnut Blight Fungus
Source: Front Microbiol. 2018 Jun 15;9:1286. doi: 10.3389/fmicb.2018.01286 (PMC6013588; doi:10.3389/fmicb.2018.01286)
Supplement: Supplementary file 4 [file Table_4.XLSX]

## Sheet: sheet 1
Supplementary Table 4. Profile of comparative proteome profile between Δcpubi4 and DK80
protein ID	description	Coverage	Unique Peptides	PSMs	AAs	MW [kDa]	calc. pI	Δcpubi4_1/DK80_1	Δcpubi4_2/DK80_2	Δcpubi4_3/DK80_3	average Δcpubi4/DK80	t test p value	Regulated
255343	--	5.25	1	2	571	61.1468	7.88428	13.2425	8.98807	10.7441	10.9916	0.0149212	up
323622	--	14.08	1	3	71	8.45312	9.94971	6.35636	5.59014	9.40387	7.11679	0.0343983	up
268613	--	20	4	5	235	25.7077	6.39209	4.25584	3.99448	3.91434	4.05489	0.00113719	up
334106	--	1.63	1	1	614	66.3937	6.04932	4.30079	3.9744	3.84237	4.03919	0.00200355	up
348912	--	2.36	2	2	888	94.2499	9.02686	3.89252	3.96443	4.07176	3.97623	0.00030604	up
280355	30 kDa heat shock protein	29.3	6	11	215	23.4597	8.88037	3.64667	3.91657	4.18382	3.91569	0.00281645	up
326951	--	4.72	2	3	424	45.1247	7.32764	2.89708	2.62658	2.73617	2.75328	0.0020014	up
327840	Endopolygalacturonase AN8327	4.79	1	1	313	31.8797	3.9165	2.76293	2.6468	2.57384	2.66119	0.00109671	up
333885	Probable 1,4-beta-D-glucan cellobiohydrolase B	3.72	1	1	430	45.2021	4.1958	2.57802	2.87894	2.48763	2.6482	0.0051111	up
40668	Glutathione transporter 1	0.73	1	1	823	92.5157	8.66064	2.76647	2.47341	2.67881	2.63956	0.00279389	up
326539	--	5.75	1	3	348	38.2343	9.42236	2.66055	2.65595	2.58443	2.63364	0.0002275	up
344892	--	48.61	6	11	144	16.672	9.75928	2.50607	2.55158	2.74239	2.60001	0.0020407	up
347866	Copper resistance protein CRF1	3.19	1	1	407	44.0113	5.63037	1.67383		3.48895	2.58139	0.331684	up
329908	--	17.77	3	6	242	26.0383	6.15088	2.79788	2.44234	2.41013	2.55012	0.00636165	up
228352	Oxygen-dependent choline dehydrogenase	4.33	2	4	531	59.1168	5.46533	2.59839	2.43678	2.5043	2.51315	0.000957753	up
103600	--	62.29	9	20	175	17.6967	5.19873	2.35123	2.29781	2.66618	2.43841	0.00632299	up
243685	--	17.14	2	2	140	16.072	5.21143	2.36289	2.47966	2.35731	2.39995	0.000810676	up
104034	Ubiquitin-conjugating enzyme E2 6	7.28	2	5	261	28.7745	9.0415	2.23382	2.28905	2.39424	2.3057	0.00129594	up
354155	--	2.5	1	1	360	39.1308	6.37939	2.12199	2.25849	2.27454	2.21834	0.00157437	up
252753	Ubiquitin-conjugating enzyme E2 2	11.26	1	2	151	17.1675	6.31592	2.1061	2.1781	2.21997	2.16806	0.000809489	up
217486	1-phosphatidylinositol 4,5-bisphosphate phosphodiesterase 1	12.66	8	8	624	72.2123	8.27979	2.22294	2.03756	2.12021	2.12691	0.00225613	up
242360	Probable xyloglucan-specific endo-beta-1,4-glucanase A	5.24	1	2	229	24.3841	3.71338	2.03114	2.15405	2.15611	2.11377	0.00137336	up
335876	PHD and RING finger domain-containing protein C126.07c	9.03	5	5	609	67.2198	6.59521	1.96847	2.22988	2.1017	2.10002	0.00467357	up
349821	Uncharacterized ATP-dependent helicase C23E6.02	10.48	8	12	1135	126.14	6.88818	2.13963	2.03982	2.09781	2.09242	0.000700962	up
229978	Oxalate decarboxylase OxdC	1.37	1	1	439	49.4566	5.60498	2.15161	1.98663	2.05716	2.06514	0.00200723	up
330996	Probable S-adenosylmethionine-dependent methyltransferase CRG1	16.82	4	5	327	36.9313	5.63037	2.06083	2.08732	1.98557	2.04457	0.000850226	up
101694	--	7.09	2	2	296	33.2195	9.53955	1.99307	1.98581	2.02566	2.00151	0.00014971	up
232827	--	17.49	4	5	263	29.607	9.20264	1.99446	1.94817	2.05646	1.9997	0.000983193	up
106798	--	0.59	1	1	1025	108.808	9.87646	1.82149	1.80457	2.29918	1.97508	0.0265493	up
75354	SWIRM domain-containing protein YOR338W	6.24	4	7	417	45.9731	9.92041	1.91446	1.97303	1.98016	1.95588	0.000473725	up
248401	UPF0676 protein C1494.01	12.34	3	4	316	35.7476	7.18115	1.68634	2.02716	2.12918	1.94756	0.0193869	up
96843	Putative lipase atg15	7.32	5	8	628	67.9854	5.66846	1.85866	2.07128	1.89023	1.94005	0.00492861	up
261928	Mitogen-activated protein kinase 20	5.9	3	3	576	63.6276	8.85107	1.96309	1.86818	1.91599	1.91575	0.000893821	up
329657	--	4.05	1	1	222	25.1966	5.66846	1.99529	1.85468	1.85783	1.9026	0.00262686	up
231736	Endoglucanase-4	2.38	1	1	294	29.8861	4.13232	1.7936	1.71264	2.19613	1.90079	0.0264589	up
333038	--	10.29	1	1	136	14.8577	9.51025	1.72628	2.17483	1.79936	1.90015	0.023008	up
50588	Probable 4-hydroxy-2-oxoglutarate aldolase, mitochondrial	3.18	1	1	314	34.0715	7.66455	1.86722	1.90476	1.91979	1.89725	0.000303413	up
324890	--	6.45	1	1	155	17.3217	5.60498	1.73117	1.99452	1.89946	1.87505	0.00765316	up
223055	Uncharacterized protein HI_0912	4.52	1	1	221	25.0765	5.47803	1.90288	1.81834	1.85843	1.85988	0.000805304	up
227862	Fumonisin B1 esterase	3.81	2	2	525	57.1539	4.33545	1.80769	1.7113	2.05069	1.85656	0.0136135	up
262111	Probable endopolygalacturonase D	4.36	1	1	344	35.5885	3.96729	1.60053	1.75096	2.1964	1.8493	0.0416212	up
219948	Apoptosis-inducing factor 2	2.78	1	1	432	45.7186	6.55127	1.92081	1.81883	1.77903	1.83956	0.00251934	up
321706	--	4.32	1	4	185	18.1177	4.70361	1.82075	1.81372	1.87038	1.83495	0.000455863	up
340305	--	19.24	13	23	712	78.9457	9.74463	1.82199	1.90151	1.773	1.83217	0.00201847	up
271551	Aldehyde dehydrogenase	43.2	17	25	493	52.7911	5.47803	1.80555	1.83408	1.85652	1.83205	0.000314071	up
267009	Cell division control protein 4	2.77	3	3	1011	112.402	6.93213	1.92075	1.79489	1.76035	1.82533	0.0034694	up
337694	Glucose-induced degradation protein 4 homolog	4.71	2	2	361	40.4563	5.73193	1.9192	1.75466	1.72558	1.79981	0.00563241	up
334415	Zinc finger CCHC domain-containing protein 7	1.45	1	1	692	74.7037	6.59521	1.84468	1.81119	1.74017	1.79868	0.00148498	up
219697	Uncharacterized protein YER152C	11.18	4	5	456	50.3455	5.8208	1.70493	1.89864	1.76745	1.79034	0.00517538	up
246699	--	15.74	5	8	451	49.8688	9.31982	1.80066	1.80533	1.74589	1.78396	0.00059194	up
334138	--	11.94	2	36	201	20.729	4.25928	1.70058	1.78316	1.8337	1.77248	0.00251284	up
341384	2-methylene-furan-3-one reductase	9.46	3	4	370	39.4932	9.18799	1.83788	1.71369	1.76013	1.77057	0.00220313	up
335479	Uncharacterized protein C17H9.06c	3.55	2	2	620	69.9132	5.09717	1.79334	1.80559	1.70826	1.76906	0.00157989	up
331066	Ubiquitin-conjugating enzyme E2-20 kDa	28.82	5	7	170	18.7765	5.37646	1.77847	1.86384	1.63622	1.75951	0.00755426	up
341211	E3 ubiquitin-protein ligase dbl4	24.1	14	23	610	69.1894	5.36377	1.82333	1.67311	1.7794	1.75861	0.00343743	up
245522	Sterol 24-C-methyltransferase	33.51	11	19	370	41.7676	6.34131	1.87646	1.75017	1.64769	1.75811	0.00752994	up
329877	Protein SPT23	1.19	2	3	1350	145.781	7.34229	1.81614	1.75616	1.70172	1.75801	0.0018948	up
349790	--	1.71	1	1	467	48.9643	4.1958	1.69061	1.76029	1.80075	1.75055	0.00183133	up
229417	Bifunctional cytochrome P450/NADPH--P450 reductase	7.33	3	4	450	51.2462	8.35303	1.83609	1.70685	1.69617	1.74637	0.00361005	up
221499	Probable endo-beta-1,4-glucanase D	8.63	1	1	278	28.7979	5.77002	1.82847	1.66347	1.74649	1.74614	0.0040504	up
223808	--	15.03	2	2	173	18.1232	8.92432	1.67144	1.70289	1.85059	1.74164	0.00549946	up
255535	Ubiquitin-conjugating enzyme E2Q-like protein CG4502	11.58	13	20	1209	134.137	5.89697	1.783	1.64186	1.78882	1.7379	0.0042126	up
243167	Ubiquitin-conjugating enzyme E2 8	27.57	6	15	185	20.9919	4.42432	1.65813	1.7464	1.80541	1.73665	0.00335787	up
103799	Endochitinase B	28.24	10	22	393	44.4777	6.07471	1.79337	1.8184	1.59598	1.73592	0.00901244	up
354456	--	10.56	5	5	360	39.6841	6.63916	1.77572	1.70639	1.71718	1.7331	0.000861919	up
345836	Transaldolase	15.57	5	5	379	41.7906	5.8208	1.79431	1.64566	1.75752	1.7325	0.00370331	up
107003	--	4.19	3	8	740	80.1091	7.32764	1.72481	1.65267	1.81839	1.73196	0.00426788	up
219562	Histone-lysine N-methyltransferase, H3 lysine-79 specific	10.49	3	3	410	46.6097	5.64307	1.72507	1.69094	1.77645	1.73082	0.0011541	up
326907	--	17.7	6	10	418	46.2812	8.70459	1.52927	1.83267	1.82231	1.72808	0.0181515	up
105638	--	26.75	12	17	557	61.6171	5.51611	1.75915	1.66504	1.75173	1.72531	0.00173029	up
273059	SUR7 family protein FMP45	9.78	2	2	225	25.0344	9.53955	1.69351	1.75014	1.72293	1.72219	0.000512386	up
219053	Protein ssh4	7.98	3	4	489	53.2653	6.41748	1.7187	1.66624	1.75763	1.71419	0.00137158	up
328106	--	0.75	1	1	670	71.0871	6.53662	1.78808	1.76888	1.55617	1.70437	0.0109474	up
220118	UDP-galactose transporter homolog 1	7.79	3	5	411	44.6773	9.51025	1.69213	1.71878	1.69511	1.70201	0.000144171	up
218502	--	2.74	1	1	401	43.0852	4.38623	1.65913	1.81318	1.60678	1.69303	0.00789503	up
329044	--	7.23	1	2	249	28.6506	10.0962	1.71343	1.72068	1.6444	1.69284	0.00122877	up
250856	--	8.82	4	6	499	56.9509	8.22119	1.67453	1.62692	1.76368	1.68838	0.00337352	up
231949	--	3.04	1	2	362	39.6394	5.12256	1.61584	1.6673	1.77794	1.68703	0.00481007	up
255228	F-box protein YLR352W	11.04	6	9	652	71.0392	7.1665	1.70293	1.6566	1.69777	1.68577	0.000456609	up
277081	Autophagy-related protein 8	35	5	13	120	13.9863	7.32764	1.76668	1.70678	1.57903	1.68416	0.00647872	up
343442	--	18.88	3	3	196	21.5063	5.74463	1.69343	1.65433	1.69429	1.68068	0.000374688	up
234372	UPF0591 membrane protein C15E1.02c	19.66	3	9	117	12.4954	8.71924	1.68185	1.66224	1.67313	1.67241	7.12e-05	up
232945	--	3.69	1	1	271	29.628	4.729	1.57441	1.70046	1.74185	1.67224	0.00556401	up
109037	Probable ran guanine nucleotide release factor	48.45	7	16	194	21.2869	4.57666	1.66675	1.67278	1.67105	1.6702	7.16e-06	up
223105	Vesicle-associated membrane protein 7B	14.1	4	6	234	25.6282	8.44092	1.68863	1.65621	1.65712	1.66732	0.000254997	up
282187	ATPase family AAA domain-containing protein 3B	43.27	24	40	654	74.8996	5.32568	1.71444	1.61817	1.66209	1.6649	0.00174706	up
335032	--	12.87	1	2	101	10.692	4.729	1.56594	1.72711	1.69425	1.66243	0.00546457	up
334547	--	3.24	1	1	370	40.8171	11.0044	1.60365	1.69892	1.6647	1.65575	0.00180047	up
349651	--	5.28	3	5	720	77.6415	7.81104	1.62208	1.74083	1.60333	1.65541	0.00428667	up
320165	Protein yippee-like 3	14.68	2	3	109	12.5141	8.17725	1.65836	1.6229	1.68486	1.65537	0.000749205	up
325360	Store-operated calcium entry-associated regulatory factor	3.16	1	1	348	36.0307	9.30518	1.69343	1.6486	1.61123	1.65109	0.0013294	up
332035	--	26.51	8	9	430	48.0588	6.02393	1.69232	1.65112	1.60797	1.65047	0.0013988	up
328046	Ubiquitin-conjugating enzyme E2 14	20	2	2	150	16.5424	5.5542	1.54064	1.81862	1.58579	1.64835	0.0171935	up
323014	--	26.06	4	4	165	18.1699	7.66455	1.61837	1.69699	1.58941	1.63492	0.00255267	up
353124	--	1.78	2	2	1009	112.341	6.26514	1.62358	1.61485	1.66295	1.6338	0.000544537	up
278724	Probable aspartic-type endopeptidase opsB	6.05	2	2	430	44.5505	4.03076	1.5512	1.57429	1.76121	1.6289	0.0109933	up
236373	SET domain-containing protein 3	1.19	1	1	839	92.1951	8.38232	1.56703	1.65837	1.65658	1.62733	0.00230225	up
234098	--	8.51	1	1	141	15.9405	6.49365	1.61584	1.65351	1.61213	1.62716	0.000443976	up
233964	Uncharacterized protein YqjL	8.04	1	1	199	22.2525	7.25439	1.7659	1.53535	1.56617	1.62247	0.0132109	up
351609	--	7.11	1	1	225	25.3264	4.729	1.6742	1.65034	1.53216	1.6189	0.00499655	up
323106	--	15.91	1	2	88	9.18522	3.94189	1.55128	1.64952	1.65457	1.61846	0.00294219	up
108749	L-ornithine N(5)-monooxygenase	33.47	14	32	487	53.7604	6.53662	1.62558	1.61753	1.60082	1.61464	0.000140711	up
350080	--	13.19	6	10	417	44.2977	9.979	1.51509	1.65494	1.66832	1.61278	0.00633264	up
232237	Ubiquitin-conjugating enzyme E2 J1	21.45	5	8	331	35.2087	6.17627	1.60048	1.61238	1.62297	1.61195	0.000112666	up
324698	--	10.99	1	1	91	9.80384	9.99365	1.61404	1.528	1.68873	1.61026	0.00574034	up
266035	Probable HECT-type ubiquitin ligase-interacting protein creD	13.15	9	12	593	65.6743	6.82959	1.61012	1.62605	1.59148	1.60922	0.00026883	up
273051	Uncharacterized transporter C5D6.04	6.37	4	4	534	59.1728	5.77002	1.61257	1.62201	1.59057	1.60839	0.000234378	up
276590	--	5.63	2	2	444	48.8436	6.72705	1.59547	1.61146	1.60184	1.60292	5.94e-05	up
349691	--	12.26	3	3	424	47.595	10.0815	1.53816	1.68058	1.58215	1.6003	0.00488304	up
219560	--	7.33	3	4	423	45.1336	8.79248	1.6396	1.47656	1.68339	1.59985	0.0108267	up
325210	Succinyl-diaminopimelate desuccinylase	3.24	2	2	432	46.021	5.88428	1.6065	1.58844	1.59995	1.5983	7.79e-05	up
258600	Candidapepsin-8	22.36	5	13	331	34.1501	3.9292	1.61422	1.6051	1.55541	1.59158	0.000953088	up
230750	Probable glycosidase CRH1	3.42	1	1	322	33.4524	3.86572	1.4746	1.64372	1.63024	1.58285	0.00855703	up
347460	Transcription initiation factor TFIID subunit 7	3.8	2	3	526	58.2461	4.93213	1.57504	1.58477	1.58371	1.58117	2.81e-05	up
274707	STIP1 homology and U box-containing protein 1	25.55	6	7	274	31.5969	5.43994	1.5565	1.50518	1.65299	1.57156	0.00569711	up
215338	E3 ubiquitin-protein ligase ubr1	19.78	38	57	2159	243.619	5.74463	1.54941	1.53037	1.62437	1.56805	0.00254144	up
274970	E3 ubiquitin-protein ligase itt1	3.13	1	1	383	43.8687	8.73389	1.63285	1.59528	1.47487	1.56767	0.00697192	up
107970	Transcriptional regulator WAR1	3.38	2	3	946	100.999	6.7417	1.50862	1.58381	1.60704	1.56649	0.00273742	up
333359	--	6.54	2	2	428	47.2219	5.71924	1.64631	1.51481	1.5352	1.56544	0.00518175	up
66486	Serine/threonine-protein kinase ATG1	8.94	8	11	951	103.824	9.0708	1.5956	1.49414	1.59523	1.56166	0.00359346	up
219389	--	5.72	2	2	437	48.301	6.46826	1.632	1.51804	1.51954	1.55653	0.00456714	up
245166	Striatin-interacting protein 1	35.33	8	13	300	31.7407	8.00146	1.54409	1.51291	1.60104	1.55268	0.00217244	up
269206	Transcription elongation factor 1	25.81	3	3	62	6.95161	9.87646	1.56104	1.55524	1.53978	1.55202	0.000132085	up
232779	Protein AIM2	2.55	1	1	274	30.142	5.93506	1.53263	1.53172	1.58988	1.55141	0.00121515	up
325438	Carboxypeptidase Y homolog A	28.91	10	22	550	61.0145	4.93213	1.56121	1.62008	1.46916	1.55015	0.0063119	up
42121	Pre-mRNA-splicing factor ATP-dependent RNA helicase prp16	2.02	1	1	545	61.1522	7.23975	1.56248	1.49699	1.58761	1.54903	0.0024115	up
102480	--	23.15	5	9	311	33.7769	6.96143	1.48553	1.49484	1.66619	1.54886	0.0112575	up
279238	Probable secreted lipase ARB_02369	8.24	3	3	364	39.5621	4.75439	1.5601	1.50613	1.57018	1.54547	0.00132642	up
344416	--	1.27	1	1	866	105.515	11.4731	1.28191	1.84048	1.51041	1.54427	0.0784383	up
326823	--	4.51	2	2	510	54.9794	6.20166	1.52137	1.53144	1.57464	1.54248	0.000905878	up
333459	--	25.78	11	18	516	60.0848	9.5835	1.57691	1.5086	1.53308	1.53953	0.0013689	up
332318	--	47.42	12	22	310	33.5296	5.93506	1.54024	1.57046	1.50754	1.53941	0.00113248	up
260852	--	46.04	9	29	202	22.5185	6.29053	1.54222	1.55452	1.51654	1.53776	0.000432592	up
248650	NAD-dependent protein deacetylase SRT1	29.58	9	10	382	42.6276	7.47412	1.61965	1.45496	1.51978	1.53146	0.00802526	up
358481	--	6.29	1	1	159	16.7222	7.6499	1.56367	1.36848	1.66007	1.53074	0.025136	up
346184	Broad-range acid phosphatase DET1	34.34	17	31	565	63.331	6.7124	1.58	1.55497	1.45163	1.52887	0.00547295	up
249403	Pre-mRNA-splicing factor CWC25	17.5	2	2	200	23.1679	9.56885	1.36393	1.66984	1.53833	1.52404	0.0274142	up
271688	DNA repair helicase RAD25	7.26	5	5	785	88.8302	8.45557	1.48266	1.49291	1.59519	1.52359	0.00467413	up
349825	--	1.34	2	3	1790	190	6.93213	1.20145	1.3831	1.95751	1.51402	0.15273	up
226220	Plasma membrane ATPase	0.73	1	1	955	104.718	5.37646	1.61234	1.46461	1.4651	1.51402	0.00902337	up
259762	Uncharacterized protein C1F12.05	33.33	14	28	507	56.0825	7.40088	1.59856	1.41032	1.50903	1.50597	0.0113473	up
323473	--	6.42	1	1	109	12.6476	11.8247	1.48869	1.50833	1.51385	1.50362	0.00022975	up
351527	GDP-Man:Man(3)GlcNAc(2)-PP-Dol alpha-1,2-mannosyltransferase	13.93	8	12	567	63.3827	6.72705	1.50518	1.4356	1.56351	1.50143	0.00539262	up
342657	--	4.65	3	4	559	61.3996	10.1548	1.47637	1.50345	1.52433	1.50138	0.000765752	up
252500	Transmembrane protein 184 homolog C30D11.06c	4.52	2	3	442	49.5984	8.08936	1.51261	1.46398	1.52701	1.5012	0.00144419	up
109461	Lovastatin diketide synthase LovF	13.76	27	35	2267	245.374	6.15088	1.55324	1.47696	1.47321	1.50114	0.00269576	up
280379	Dynamin-binding protein	0.95	1	1	1788	196.248	7.94287	0.605967	0.679881	0.709307	0.665052	0.00831751	down
278954	Probable beta-glucosidase E	18.58	2	2	113	12.5903	7.45947	0.641574	0.703961	0.647764	0.664433	0.00347905	down
336524	--	46.22	5	7	119	12.8083	9.33447	0.732722	0.690095	0.568754	0.663857	0.0206913	down
332673	60S ribosomal protein L35	37.4	6	17	123	14.4923	11.2681	0.626658	0.697273	0.662207	0.662046	0.00361865	down
223670	N-acetyltransferase ats1	55.28	9	14	199	22.0743	5.49072	0.663463	0.671025	0.650689	0.661726	0.000307636	down
330727	--	32.63	9	21	285	30.7831	9.93506	0.667632	0.638919	0.674053	0.660202	0.00100892	down
227745	--	4.46	2	2	404	43.2563	6.03662	0.687146	0.613268	0.679659	0.660024	0.00473511	down
337355	14-3-3 protein homolog	74.44	18	96	266	29.6598	4.99561	0.658456	0.685208	0.633408	0.659024	0.00191844	down
283029	(S)-2-haloacid dehalogenase 4A	7.75	2	2	271	30.2584	5.16064	0.624787	0.692069	0.658592	0.658483	0.00321884	down
333723	60S ribosomal protein L36	45.28	6	14	106	11.8977	11.8101	0.695616	0.715131	0.562182	0.657643	0.0191438	down
258135	Transposon Tf2-12 polyprotein	4.9	7	10	1428	162.266	8.90967	0.680624	0.653597	0.635917	0.656713	0.00143092	down
235111	Mitochondrial import inner membrane translocase subunit TIM9	8.54	1	1	82	9.48953	7.81104	0.683813	0.653574	0.630448	0.655945	0.00201058	down
350934	Bifunctional cytochrome P450/NADPH--P450 reductase	4.43	4	4	903	99.9986	6.23975	0.64825	0.656505	0.654619	0.653125	5.18e-05	down
261324	NADH-cytochrome b5 reductase 2	10.33	2	2	184	20.3857	9.11475	0.616668	0.657866	0.67782	0.650784	0.00264757	down
231274	Secondary metabolism regulator LAE1	6.69	2	4	314	35.4144	4.95752	0.647172	0.639411	0.664277	0.650287	0.00044085	down
227273	Tripeptidyl-peptidase sed1	1.07	1	2	655	71.6126	4.67822	0.66489	0.624241	0.661303	0.650145	0.00137645	down
231441	N-acyl homoserine lactonase AttM	5.93	2	2	354	38.7275	5.36377	0.660015	0.608422	0.676383	0.648274	0.00337269	down
221034	Enoyl reductase LovC	5.29	2	2	359	38.9439	6.7124	0.669133	0.646332	0.628287	0.647918	0.00112473	down
351611	--	6.61	1	4	333	37.3903	4.22119	0.648532	0.652284	0.640939	0.647251	8.95e-05	down
222750	Glutathione S-transferase P 1	11.46	2	6	253	28.3564	5.92236	0.644739	0.647792	0.649075	0.647202	1.33e-05	down
330586	--	65.32	31	104	571	59.396	4.85596	0.641252	0.656303	0.64276	0.646772	0.0001835	down
329565	UPF0553 protein C589.05c	10.38	2	2	366	42.286	5.36377	0.647072	0.630186	0.662163	0.646473	0.00068182	down
107132	--	4.12	1	1	170	18.3516	7.02002	0.613378	0.668723	0.653604	0.645235	0.00216025	down
325606	--	50.93	9	18	216	24.2889	4.729	0.663572	0.638724	0.632356	0.644884	0.000718346	down
329791	Cytochrome c oxidase polypeptide 5, mitochondrial	42.7	8	24	178	19.2779	9.5542	0.663408	0.672216	0.597887	0.644504	0.00432176	down
238062	2-methylcitrate dehydratase, mitochondrial	31.63	13	21	509	56.0705	6.48096	0.67365	0.645011	0.614385	0.644349	0.00230691	down
220455	2-oxoisovalerate dehydrogenase subunit beta, mitochondrial	1.6	1	1	374	40.9262	6.72705	0.616257	0.599091	0.716949	0.644099	0.0105008	down
220652	AB hydrolase superfamily protein YdjP	3.54	1	1	311	34.4509	5.68115	0.658771	0.616335	0.656279	0.643795	0.00148646	down
225024	Mitochondrial 37S ribosomal protein S27	15	1	1	80	9.51792	8.1626	0.658915	0.655396	0.616318	0.643543	0.00146321	down
334855	Cytochrome c oxidase subunit 6, mitochondrial	63.64	10	31	154	17.727	6.58057	0.63353	0.644761	0.650738	0.64301	0.000199574	down
104921	--	76.27	7	17	118	12.8935	5.21143	0.633012	0.663076	0.632861	0.642983	0.000790935	down
272021	Phenylacetaldehyde dehydrogenase	11.5	2	4	374	40.2232	7.43018	0.530914	0.762393	0.634115	0.642474	0.0333256	down
103866	--	14.49	3	3	207	23.6994	4.90674	0.607676	0.640055	0.677357	0.641696	0.00314214	down
20257	Prefoldin subunit 6	17.95	2	2	117	13.136	5.18604	0.671326	0.647134	0.603351	0.640604	0.00304954	down
227746	Putative sterigmatocystin biosynthesis monooxygenase stcW	2.17	1	1	554	62.9455	6.34131	0.629286	0.654037	0.638382	0.640568	0.000404185	down
102781	60S ribosomal protein L14	58.33	7	29	144	16.2539	10.521	0.651224	0.620579	0.644126	0.638643	0.000656248	down
224496	NADH dehydrogenase	10.34	1	1	116	13.5049	9.5249	0.650088	0.639193	0.626287	0.638523	0.000361953	down
224380	Prefoldin subunit 4	12.98	2	3	131	15.2566	4.57666	0.629163	0.65819	0.62618	0.637844	0.000793731	down
357295	Coactosin	52.38	7	19	168	18.6383	5.50342	0.666936	0.643802	0.602662	0.6378	0.00268197	down
251016	Alanine racemase TOXG	37.04	10	17	351	37.7671	6.45557	0.661078	0.622458	0.62949	0.637675	0.00107266	down
324752	--	76.4	18	53	161	18.4973	4.90674	0.624431	0.654481	0.62506	0.634657	0.000735461	down
253168	Glycogen phosphorylase	55.19	43	137	877	99.4806	6.07471	0.638948	0.614325	0.648644	0.633972	0.000777901	down
103140	60S acidic ribosomal protein P0	60.7	1	53	313	33.6181	4.71631	0.586601	0.718434	0.591966	0.632333	0.0134515	down
245734	Levodione reductase	39.92	7	11	253	27.0467	7.57666	0.671447	0.602209	0.620711	0.631456	0.00313894	down
326589	Probable sterol O-acyltransferase 2	2.14	1	1	560	63.7998	8.26514	0.613655	0.653706	0.620986	0.629449	0.00110211	down
322879	NADH-ubiquinone oxidoreductase 10.5 kDa subunit	72.34	7	12	94	10.6925	9.45166	0.619225	0.631756	0.635895	0.628958	0.000182371	down
43032	UDP-glycosyltransferase 84A3	6.19	3	4	501	54.6305	7.29834	0.5746	0.701047	0.602806	0.626151	0.0103453	down
220172	Probable proline dehydrogenase, mitochondrial	8.56	3	3	432	47.0554	8.01611	0.591261	0.653974	0.633056	0.626097	0.00242209	down
23178	tRNA-dihydrouridine(16/17) synthase	1.12	1	1	538	59.0367	7.38623	0.644886	0.62515	0.606002	0.625346	0.000896509	down
263730	--	44.17	5	8	120	13.1907	5.05908	0.617447	0.650523	0.606679	0.624883	0.00123438	down
353531	Isocitrate lyase	4.95	2	3	546	60.6286	7.1958	0.655043	0.585515	0.632683	0.624414	0.00296369	down
335178	--	13.12	15	18	1242	140.001	6.34131	0.618508	0.61462	0.639117	0.624082	0.000408594	down
72891	--	9.47	2	2	243	26.8189	8.70459	0.633907	0.614064	0.623254	0.623742	0.000232116	down
357089	Glutathione S-transferase 1	14.48	3	4	221	24.8039	5.96045	0.644723	0.602136	0.617459	0.621439	0.00108055	down
229569	Aldehyde dehydrogenase family 1 member A3	26.02	7	13	465	50.3801	5.45264	0.627187	0.607106	0.62748	0.620591	0.00031571	down
102161	--	21.02	3	4	157	16.8358	5.2749	0.637296	0.593347	0.631021	0.620555	0.00130557	down
334493	Translation machinery-associated protein 10	85.83	7	23	127	13.5955	5.05908	0.559808	0.621177	0.67888	0.619955	0.0080838	down
244514	40S ribosomal protein S29	28.57	3	6	56	6.50831	10.5649	0.605919	0.638151	0.610214	0.618094	0.00069929	down
321463	--	1.5	1	1	333	35.6943	6.21436	0.612034	0.55909	0.667397	0.61284	0.00645942	down
262385	Arylsulfatase	19.06	9	18	530	58.8439	5.21143	0.614149	0.61287	0.609653	0.612224	1.19e-05	down
341616	Probable prefoldin subunit 2	50.86	5	6	116	13.232	8.07471	0.647344	0.601261	0.587149	0.611918	0.00218618	down
101476	Multistep phosphorelay regulator 1	80.95	9	24	147	16.631	4.41162	0.593057	0.632014	0.59732	0.607464	0.000986285	down
337563	Isotrichodermin C-15 hydroxylase	1.68	1	1	357	40.154	5.47803	0.608935	0.570727	0.641108	0.606923	0.0026674	down
224760	60S acidic ribosomal protein P1	72.73	4	25	110	11.1345	4.14502	0.591365	0.616106	0.61151	0.606327	0.000372283	down
229493	Endo-1,6-beta-D-glucanase	10.06	4	10	467	49.405	4.24658	0.603146	0.590605	0.61967	0.604474	0.000452494	down
221385	Nuclease PA3	9.94	3	6	322	34.9777	4.39893	0.579105	0.620147	0.612946	0.604066	0.00101961	down
224985	NADH dehydrogenase	18.42	2	2	76	9.13347	8.47021	0.572895	0.612044	0.622504	0.602481	0.00143942	down
60089	Polyketide synthase-nonribosomal peptide synthetase	3.01	6	6	2391	260.01	6.29053	0.602976	0.5712	0.631712	0.601963	0.00192204	down
105467	Farnesyl pyrophosphate synthase	34.22	13	29	374	42.5888	5.18604	0.621206	0.615012	0.56764	0.601286	0.00179553	down
325554	Glutathione S-transferase 1	18.55	5	10	248	27.7944	6.80029	0.623345	0.584236	0.594321	0.600634	0.000860511	down
239079	Hercynylcysteine sulfoxide lyase	4.68	2	2	449	50.0453	5.85889	0.509686	0.608577	0.673578	0.59728	0.013711	down
283672	--	26.67	3	4	120	13.3979	8.99756	0.548644	0.602028	0.63692	0.595864	0.00400996	down
226763	Probable 5-methyltetrahydropteroyltriglutamate--homocysteine methyltransferase	68.54	47	208	766	85.5935	6.72705	0.600785	0.591495	0.594476	0.595585	4.58e-05	down
69448	Iterative polyketide synthase CazM	5.05	2	2	416	45.8856	6.75635	0.581683	0.624335	0.574026	0.593348	0.00147788	down
328740	Altered inheritance of mitochondria protein 41, mitochondrial	25	4	6	152	16.633	9.24658	0.596164	0.584291	0.597214	0.592556	0.00010341	down
327534	Delta-1-pyrroline-5-carboxylate dehydrogenase, mitochondrial	55.05	26	61	554	60.1107	7.34229	0.599592	0.579179	0.594934	0.591235	0.000228215	down
223944	L-rhamnose mutarotase	56	7	11	125	14.8373	6.32861	0.617962	0.574206	0.57826	0.590143	0.0011579	down
105888	--	19.93	6	14	286	31.4004	4.24658	0.595073	0.588904	0.586323	0.5901	4.01e-05	down
352716	--	12.03	3	4	316	34.8886	9.78857	0.564521	0.606655	0.59696	0.589379	0.000961232	down
280649	--	34.78	4	17	115	12.7074	4.7417	0.569892	0.592262	0.605724	0.589293	0.00064676	down
357354	Respiratory supercomplex factor 1, mitochondrial	13.21	3	4	212	23.7539	9.27588	0.633788	0.626293	0.504829	0.588303	0.0101486	down
221383	Probable 3-hydroxyisobutyrate dehydrogenase, mitochondrial	2.15	1	1	325	33.9292	7.76709	0.579431	0.545309	0.639257	0.587999	0.00441179	down
224403	ATP synthase subunit f, mitochondrial	26.26	3	8	99	10.929	10.5356	0.59732	0.625346	0.535543	0.58607	0.00408191	down
100780	60S ribosomal protein L7	62.04	1	59	245	28.3066	9.979	0.557336	0.596591	0.601781	0.585236	0.00114232	down
263597	Putative HC-toxin efflux carrier TOXA	15.58	6	9	584	61.897	7.00537	0.574606	0.577126	0.600895	0.584209	0.000405424	down
256210	Oxygen-dependent choline dehydrogenase 1	22.69	10	16	542	58.2908	5.42725	0.61626	0.590764	0.531829	0.579617	0.00351856	down
234544	40S ribosomal protein S19	76.82	14	49	151	16.6716	9.20264	0.62341	0.600262	0.508992	0.577555	0.00676629	down
332325	--	62.5	6	7	176	19.7142	4.62744	0.549991	0.595384	0.583618	0.576331	0.001029	down
349686	2-methylene-furan-3-one reductase	39.25	11	15	321	34.1825	6.12549	0.57968	0.586395	0.55904	0.575038	0.000374894	down
235274	Neurofibromin	0.4	1	1	2475	275.353	5.70654	0.53622	0.572415	0.60698	0.571872	0.00226906	down
103787	Ubiquitin-40S ribosomal protein S27a	51.97	9	90	152	17.5024	9.83252	0.551579	0.58688	0.575822	0.571427	0.000591167	down
332324	--	46.69	11	24	317	35.8247	6.30322	0.555287	0.585885	0.56444	0.568537	0.000441339	down
233087	UPF0659 protein C216.03	59	11	19	261	28.3648	6.80029	0.566283	0.584875	0.552821	0.567993	0.000462379	down
331770	--	3.03	1	2	231	25.2527	4.53857	0.575121	0.557589	0.563232	0.565314	0.000141252	down
103157	Putative daunorubicin C-13 ketoreductase DnrU	11.9	4	5	336	35.9	6.90283	0.604563	0.5375	0.533405	0.558489	0.00271852	down
328973	--	41.21	9	12	313	36.0919	5.2749	0.572224	0.621634	0.473334	0.55573	0.00949321	down
250085	Elongation factor 1-gamma-A	48.31	9	24	207	22.4537	5.66846	0.555464	0.568553	0.542475	0.555498	0.000286707	down
102917	--	48.98	7	25	98	10.8747	9.56885	0.58536	0.662374	0.417772	0.555169	0.0253511	down
333867	Homoserine O-acetyltransferase	51.97	18	61	356	39.1822	5.12256	0.537174	0.567131	0.55629	0.553532	0.000384506	down
358141	30S ribosomal protein 2, chloroplastic	8.97	2	2	301	33.8099	8.54346	0.634959	0.560618	0.463278	0.552952	0.0121389	down
102597	Uncharacterized protein C9E9.04	42.23	8	16	206	23.6758	9.30518	0.567027	0.549251	0.536547	0.550942	0.000387247	down
101014	--	67.61	6	12	71	7.69776	6.55127	0.601956	0.403547	0.638753	0.548085	0.0251449	down
348705	DNA polymerase zeta catalytic subunit	1.44	1	1	1597	181.456	8.06006	0.339227	0.69203	0.595827	0.542361	0.0490744	down
107757	ATP synthase subunit 4, mitochondrial	54.29	14	33	245	26.4281	8.99756	0.540201	0.543554	0.533265	0.539006	4.32e-05	down
251895	Lysine acetyltransferase	29.02	10	12	410	45.692	7.00537	0.529056	0.57502	0.508922	0.537666	0.00178518	down
245314	Mitochondrial import inner membrane translocase subunit TIM13	24.69	2	2	81	9.28341	8.17725	0.512731	0.566293	0.518162	0.532395	0.00132241	down
42142	--	9.63	1	1	135	16.5071	5.60498	0.526231	0.570091	0.494781	0.530368	0.00215537	down
265885	Versicolorin B synthase	35.54	20	35	605	65.3693	6.20166	0.541564	0.522302	0.514758	0.526208	0.000283613	down
229396	Uncharacterized FAD-linked oxidoreductase ARB_02372	15.97	5	9	476	51.6856	4.83057	0.519897	0.552899	0.502234	0.52501	0.000975651	down
253380	--	72.82	7	17	103	10.9973	4.7417	0.503072	0.518751	0.543623	0.521815	0.000608989	down
351065	Retinol dehydrogenase 13	7.88	1	3	292	32.2867	6.23975	0.542819	0.502684	0.513121	0.519541	0.000625563	down
232468	--	41.58	8	15	279	30.4152	5.90967	0.508142	0.525977	0.521245	0.518455	0.000122684	down
105308	Uncharacterized protein C32A11.02c	16.83	13	15	796	88.796	8.71924	0.51806	0.499014	0.533718	0.516931	0.000431152	down
223340	--	20.45	4	4	176	19.1747	5.35107	0.50989	0.50178	0.530572	0.514081	0.000311038	down
67838	--	28.04	35	80	1216	134.858	8.96826	0.512418	0.515793	0.505389	0.5112	3.93e-05	down
229147	--	7.34	3	3	477	54.0908	6.87354	0.504742	0.473914	0.538608	0.505755	0.00142576	down
355993	--	6.72	1	1	119	13.9522	8.39697	0.403341	0.543046	0.567156	0.504515	0.0104545	down
275959	Uncharacterized FAD-linked oxidoreductase ARB_02478	1.38	1	1	506	55.1635	4.43701	0.509982	0.472662	0.53039	0.504345	0.00116073	down
275342	Ubiquitin-60S ribosomal protein L40	34.62	3	11	52	6.08332	10.3013	0.509355	0.548907	0.449902	0.502721	0.003331	down
320029	--	18.31	1	1	71	7.34567	5.08447	0.496206	0.507722	0.501964	0.501964	4.46e-05	down
326707	Tetracycline resistance protein from transposon Tn4351/Tn4400	45.63	17	30	469	50.3112	5.74463	0.511894	0.496096	0.494797	0.500929	0.00012123	down
334102	1,3-beta-glucanosyltransferase gel1	17.11	6	12	380	41.096	4.04346	0.469674	0.494124	0.530704	0.498167	0.00124642	down
356341	Cholinesterase	2.45	1	1	327	36.1216	4.76709	0.478943	0.49991	0.49593	0.491594	0.000159885	down
232356	Isoflavone reductase homolog IRL	22.77	6	8	303	33.442	5.69385	0.465103	0.525789	0.483239	0.491377	0.00124799	down
102936	--	6.25	1	6	192	18.2033	4.1958	0.399564	0.628549	0.431701	0.486605	0.0188881	down
255109	2,3-dimethylmalate lyase	40.22	12	15	368	39.4262	5.85889	0.475912	0.462249	0.502727	0.480296	0.000522903	down
267236	Indoleamine 2,3-dioxygenase 1	52.79	20	84	466	53.1348	6.40479	0.471947	0.488836	0.469209	0.476664	0.000137491	down
355539	--	8.85	1	1	113	12.6898	11.2827	0.480993	0.470669	0.461834	0.471165	0.000109579	down
234549	--	7.97	1	1	138	15.7942	6.87354	0.451497	0.481916	0.440248	0.457887	0.000526624	down
242101	--	11.86	3	3	253	28.1984	5.43994	0.465182	0.43284	0.46853	0.455517	0.00043652	down
349325	Putative nitroreductase HBN1	46.31	9	15	203	22.7056	5.41455	0.455347	0.442062	0.460124	0.452511	9.74e-05	down
255822	Uncharacterized oxidoreductase C162.03	56.57	15	35	297	31.9364	7.28369	0.447755	0.437959	0.455351	0.447022	8.29e-05	down
343596	Uncharacterized protein MT1298	15.53	5	10	425	45.9212	8.68994	0.462359	0.413375	0.445619	0.440451	0.000659296	down
262521	--	51.82	5	7	110	11.9345	8.6167	0.461777	0.433309	0.425847	0.440311	0.000382346	down
245581	Lipid phosphate phosphatase 1	13.99	4	8	386	41.8259	8.51416	0.430191	0.417078	0.427734	0.425001	4.9e-05	down
108594	Zinc-binding alcohol dehydrogenase domain-containing protein cipB	38.6	9	19	342	35.0267	6.41748	0.425689	0.400991	0.430942	0.419207	0.000252642	down
265971	--	33.79	10	29	290	31.8776	7.03467	0.451273	0.398634	0.40543	0.418446	0.000806976	down
231868	Uncharacterized oxidoreductase C736.13	22.19	6	7	329	36.4829	6.44287	0.424553	0.375208	0.410883	0.403548	0.000607621	down
350047	--	3.98	1	2	477	49.9734	4.41162	0.400679	0.403657	0.403444	0.402593	2.58e-06	down
322462	--	39.55	5	6	134	14.9584	6.91748	0.347389	0.416701	0.357393	0.373828	0.00119114	down
332047	Uncharacterized protein MT3735	52.22	21	42	427	46.9232	6.26514	0.325771	0.342786	0.337755	0.335438	5.77e-05	down
223482	Aspergillopepsin-2	5.66	1	1	212	22.386	3.68799	0.168409	0.146689	0.15862	0.157906	5.56e-05	down
217825	Putative transporter C543.05c	4.01	1	3	548	60.7145	6.90283	1.58805	3.44076	3.11605	2.71495	0.0953351
239321	Tubulin alpha-B chain	66.22	1	115	444	49.2499	5.04639	1.44315	1.74169	2.65567	1.94684	0.121857
217800	--	3.04	1	1	527	57.3903	9.72998	1.37285	1.60045	2.29075	1.75468	0.111746
338662	L-2-hydroxyglutarate oxidase LhgO	2.88	1	2	382	41.1659	6.31592	1.72975	0.500405	2.71196	1.64737	0.418091
321887	Probable glucan endo-1,3-beta-glucosidase eglC	14.62	3	7	301	32.9267	4.15771	1.27359	1.6596	1.72197	1.55172	0.0589449
224095	--	5.42	1	1	166	18.5259	9.36377	1.31756	1.79096	1.43073	1.51308	0.0694208
239389	Diphthamide biosynthesis protein 1	2.04	1	1	441	48.5781	6.84424	1.74869	1.40428	1.37427	1.50908	0.0514182
326267	Vacuolar aminopeptidase 1	33.33	12	23	492	52.6408	6.53662	1.47185	1.52403	1.50167	1.49918	0.000915695
59477	--	8.77	1	1	114	11.8587	9.5249	1.54015	1.444	1.50762	1.49726	0.00320854
263716	Ubiquitin-like modifier-activating enzyme atg7	14.29	7	9	644	71.2099	6.16357	1.50923	1.44277	1.53467	1.49556	0.00304207
334675	Retinol dehydrogenase 14	9.18	1	3	294	31.3261	6.22705	1.2439	1.69975	1.52584	1.48983	0.0662958
227329	Chaperone protein DnaK	14.03	7	8	563	63.1288	7.84033	1.52463	1.44531	1.4912	1.48705	0.00222128
227535	Peroxisomal membrane protein PEX30	5.77	4	4	641	70.3202	9.21729	1.54067	1.37879	1.53662	1.48536	0.0118447
103287	--	54.74	8	17	190	22.0859	8.44092	1.5005	1.53455	1.41969	1.48491	0.00489735
348420	Ran-binding protein 10	23.51	3	22	689	75.854	6.13818	1.53575	1.3973	1.52011	1.48438	0.00806935
230141	Sterol uptake control protein 2	1.88	1	1	319	36.6189	6.88818	1.54631	1.47647	1.42881	1.48387	0.00493585
52007	--	4.59	1	1	327	36.5804	9.99365	1.41015	1.46846	1.56424	1.48095	0.00861088
215328	Autophagy-related protein 2	1.28	3	3	2038	220.993	5.07178	1.49503	1.45002	1.49454	1.47986	0.00096566
232889	Protein lifeguard 4	7.39	2	2	284	31.1379	5.05908	1.55473	1.39773	1.48253	1.47833	0.0088776
224812	Uncharacterized protein B24G3.190	25.56	2	2	90	9.91797	4.83057	1.43928	1.53561	1.4366	1.4705	0.00475582
258427	Probable kinase CHARK	19.09	9	10	592	66.2579	7.23975	1.47613	1.41622	1.51692	1.46975	0.00385335
21805	TBC1 domain family member 5	1.1	1	1	546	61.2665	5.2749	1.38395	1.42205	1.59385	1.46662	0.0186098
290575	Nudix hydrolase 14, chloroplastic	11.66	4	5	326	37.0768	5.74463	1.46794	1.48488	1.43531	1.46271	0.000986728
325297	--	1.24	1	1	643	68.9805	10.2427	1.47977	1.42538	1.47844	1.4612	0.00150531
62671	--	57.75	3	13	71	7.81593	6.29053	1.38393	1.60758	1.38552	1.45901	0.0252061
269318	Microfibrillar-associated protein 1	4.99	2	2	481	54.3275	5.78271	1.40589	1.42008	1.54328	1.45641	0.00901182
281789	Beta-galactosidase	0.97	1	1	932	104.61	5.65576	1.57763	1.31487	1.47527	1.45592	0.0269954
344723	Telomerase-binding protein EST1A	10.63	7	8	640	72.9612	5.93506	1.45877	1.45142	1.4501	1.45343	3.54e-05
103384	Aspartic protease pep1	70.98	1	58	441	47.7612	4.83057	1.41045	1.49402	1.45559	1.45336	0.00282549
221425	--	3.45	1	1	261	30.0932	8.32373	1.45411	1.44299	1.46263	1.45324	0.000157387
336717	WD repeat-containing protein 26	14.21	9	12	584	64.726	5.99854	1.45045	1.46378	1.44517	1.45313	0.000149349
333248	V-type proton ATPase 16 kDa proteolipid subunit	21.77	3	6	147	14.7911	8.30908	1.28909	1.42474	1.64216	1.452	0.0480566
271498	WD repeat-containing protein pop1	3.76	2	2	611	66.8876	6.97607	1.40949	1.40758	1.53772	1.4516	0.00897059
243291	Acetyltransferase	3.59	1	1	167	18.4834	6.32861	1.30718	1.29087	1.75334	1.45047	0.0969552
221242	Growth hormone-inducible transmembrane protein	10.06	4	7	358	38.5294	10.5503	1.3576	1.4458	1.54738	1.45026	0.0145084
235571	Sterol 3-beta-glucosyltransferase	3.73	6	6	1395	155.806	7.09326	1.42903	1.4187	1.49616	1.44796	0.00292519
328254	Plasma membrane proteolipid 3	7.01	1	1	157	16.8083	5.78271	1.37005	1.50683	1.45054	1.44248	0.0079499
328840	GPN-loop GTPase 2	4.68	1	1	342	38.5281	4.69092	1.38281	1.62967	1.31074	1.44107	0.0447387
253435	Leucine aminopeptidase 1	44.39	14	38	401	44.484	4.85596	1.4407	1.50279	1.37609	1.43986	0.00684414
14760	Peroxisomal membrane protein PEX29	5.54	2	2	433	48.9127	6.26514	1.56974	1.47097	1.27562	1.43878	0.0366694
237265	--	16.85	9	9	623	68.8749	6.78564	1.39262	1.38128	1.54036	1.43809	0.0134055
215478	--	4.89	5	7	1512	170.63	9.26123	1.42302	1.38641	1.50211	1.43718	0.006044
287566	FAD-linked oxidoreductase DDB_G0289697	20.67	7	15	450	48.3707	4.52588	1.38066	1.46319	1.4661	1.43665	0.00408915
271786	Patatin-like phospholipase domain-containing protein MGG_12849	17.06	9	14	715	80.4752	9.18799	1.40875	1.44671	1.45339	1.43628	0.00101342
282892	DNA oxidative demethylase ALKBH2	10.22	8	8	969	106.012	6.771	1.40286	1.41812	1.48619	1.43572	0.00343867
97996	Kyphoscoliosis peptidase	10.24	6	6	635	69.2535	9.14404	1.53659	1.46942	1.30055	1.43552	0.0250196
219634	Sphingosine N-acyltransferase lag1	1.58	1	2	444	51.382	6.53662	1.51094	1.32464	1.47045	1.43534	0.0164708
105381	Catalase A	14.14	5	6	481	53.7482	6.22705	1.46431	1.45837	1.38025	1.43431	0.0038667
234838	--	23.48	3	3	115	12.6283	5.42725	1.41361	1.41178	1.4775	1.4343	0.00246638
255500	Heterokaryon incompatibility protein 6, OR allele	2.97	1	1	303	34.0936	8.67529	1.42698	1.38305	1.48621	1.43208	0.00475016
351251	--	6.23	2	4	257	29.1884	7.1665	1.46788	1.43454	1.39234	1.43159	0.00255496
35695	Zinc-binding alcohol dehydrogenase domain-containing protein cipB	4.61	1	1	217	22.8677	6.52197	1.39143	1.45096	1.44405	1.42881	0.00191578
350870	Uncharacterized RING finger protein P32A8.03c	10.37	4	6	492	52.0478	6.53662	1.4214	1.35481	1.50869	1.4283	0.0106499
331216	Uncharacterized protein CAWG_04269, mitochondrial	38.27	5	6	196	21.46	6.41748	1.42273	1.46233	1.39725	1.42744	0.00195642
278481	PHD finger protein At2g01810	3.73	2	3	536	62.1087	7.48877	1.45027	1.36986	1.45924	1.42646	0.0044104
349304	--	4.35	2	3	897	99.6549	7.23975	1.38308	1.41358	1.47779	1.42482	0.00428939
351487	--	11.91	6	13	613	69.569	7.56201	1.51906	1.40393	1.35116	1.42472	0.0133512
220205	Mitochondrial protein import protein mas5	62.11	19	39	417	45.1271	6.26514	1.47412	1.42584	1.36929	1.42308	0.00508672
265714	Probable ubiquitin fusion degradation protein C12B10.01c	18.54	28	39	1726	188.663	5.17334	1.42543	1.3959	1.44755	1.42296	0.00124871
330236	--	3.39	1	2	384	42.4328	8.71924	1.61325	1.35905	1.29352	1.42194	0.0494728
334763	Endothiapepsin	6.55	2	3	351	36.5633	4.09424	1.36028	1.45495	1.44987	1.4217	0.00527324
231039	Protein psi1	36.24	13	21	378	40.5123	8.49951	1.4205	1.48126	1.36232	1.42136	0.00657556
270038	Lovastatin diketide synthase LovF	1.02	2	2	2346	254.047	5.73193	1.48329	1.4024	1.37313	1.41961	0.00610749
334025	Long-chain-fatty-acid--CoA ligase 1	26.1	17	34	682	74.5353	6.69775	1.46169	1.38971	1.40261	1.418	0.00279835
349820	--	17.03	10	13	646	75.5107	9.62744	1.43126	1.41079	1.41147	1.41784	0.000257994
98385	--	1.52	2	2	1118	122.559	6.75635	1.47117	1.40364	1.37464	1.41649	0.00468118
329802	--	11.59	7	9	630	71.7027	7.12256	1.38118	1.3839	1.47762	1.41423	0.0058065
238529	Origin recognition complex subunit 2	3.48	1	1	488	53.497	5.43994	1.12663	1.71126	1.39902	1.4123	0.134719
353768	MYND-type zinc finger protein samB	0.95	1	1	632	70.5343	7.44482	1.44872	1.38139	1.39344	1.40785	0.0025728
231499	Autophagy-related protein 3	30.2	8	14	351	38.7407	4.69092	1.43933	1.39676	1.3872	1.40776	0.00154014
243500	Probable 5-hydroxyisourate hydrolase	11.26	1	1	151	16.5613	5.74463	1.30783	1.36001	1.55309	1.40698	0.0319923
331225	Origin recognition complex subunit 1	1.55	1	1	451	50.4664	6.03662	1.44723	1.41749	1.35608	1.40693	0.00432135
220521	--	2.78	1	1	360	40.7185	9.5835	1.38558	1.40222	1.43292	1.40691	0.00115888
347762	Protein kinase kin1	15.14	14	22	925	103.024	9.59814	1.43789	1.40242	1.37888	1.4064	0.00177592
228063	Tannase	5.92	2	3	557	61.1291	4.42432	1.36467	1.31915	1.53455	1.40613	0.0250701
245285	Ribonuclease T2-like	14.04	3	3	235	26.6178	6.43018	1.39032	1.41008	1.40603	1.40214	0.000224441
350379	--	1.53	1	1	653	72.6238	7.06396	1.28696	1.5783	1.34021	1.40182	0.0462655
222817	--	18.93	4	6	243	26.9923	4.84326	1.37747	1.49936	1.32393	1.40025	0.0164056
233772	Glutathione S-transferase 3	5.5	1	1	218	24.3885	5.78271	1.4279	1.40752	1.36145	1.39895	0.00241815
271123	GTP-binding protein gtr2	2.78	1	1	324	36.9397	5.08447	1.39946	1.4105	1.3834	1.39779	0.000391037
226203	DNA repair protein RAD16	2.12	2	2	659	75.5624	8.83643	1.38595	1.46407	1.34126	1.39709	0.00806913
219850	Cyclin pch1	3.61	2	2	443	49.7845	6.49365	1.4145	1.40244	1.37312	1.39669	0.000957959
222754	Ribosome biogenesis protein nsa2	8.81	2	3	261	29.5739	10.3745	1.48513	1.3195	1.38387	1.39617	0.0144869
248368	D-2-hydroxyacid dehydrogenase	33.62	10	18	348	38.316	7.1958	1.36666	1.4403	1.38129	1.39608	0.00321332
279082	Vacuolar protease A	50.53	15	81	376	40.9602	4.90674	1.37829	1.41303	1.39276	1.39469	0.000650853
219941	Uncharacterized protein C22F8.09	7.99	2	3	438	48.9268	9.5249	1.35754	1.50151	1.31884	1.39263	0.0194521
326539	--	4.04	1	1	272	30.0746	9.72998	1.37238	1.37911	1.42519	1.39222	0.00178558
216865	Protein SKT5	6.6	4	5	697	75.4119	7.02002	1.37045	1.2651	1.53909	1.39154	0.0391126
104024	Protein vip1	68.53	20	96	251	27.1525	6.354	1.3829	1.38671	1.39739	1.389	0.000124366
239692	SH3 domain-containing protein PJ696.02	35.31	11	14	388	40.6717	9.05615	1.36379	1.34388	1.45812	1.3886	0.00812148
326977	NAD-dependent protein deacetylase hst2-1	30.99	11	14	484	51.8606	4.79248	1.41518	1.38498	1.36539	1.38852	0.00138611
338373	DNA repair protein rhp42	0.75	1	1	934	105.136	6.37939	1.51788	1.19649	1.45007	1.38815	0.0580261
283023	Dual specificity protein kinase pom1	2.72	5	7	1435	155.761	10.1548	1.37748	1.34926	1.43704	1.38793	0.00441898
351982	Chromatin modification-related protein YNG2	8.8	4	4	443	47.2877	8.66064	1.39432	1.37472	1.39328	1.38744	0.000269841
11017	Transcription initiation factor TFIID subunit 2	1.53	2	2	1174	135.259	6.02393	1.43796	1.3555	1.36594	1.38646	0.00446962
107093	Endothiapepsin	13.02	3	11	361	37.3959	4.38623	1.32399	1.42766	1.40678	1.38614	0.0066538
354311	--	21.9	7	8	347	39.7471	5.37646	1.39022	1.38537	1.38009	1.38523	5.76e-05
334263	--	6.19	6	9	1277	144.346	9.18799	1.41713	1.3834	1.35446	1.385	0.00220481
222342	Splicing factor spf30	13.2	4	5	303	32.9767	8.92432	1.36091	1.41809	1.37411	1.38437	0.00201583
327108	Subtilisin-like proteinase Spm1	22.12	9	30	520	54.9999	5.56689	1.36767	1.38991	1.39052	1.3827	0.000385623
227150	Uncharacterized WD repeat-containing protein C2A9.03	2.54	1	1	433	48.7269	5.32568	1.34602	1.42549	1.37336	1.38162	0.00370996
327162	Probable E3 ubiquitin-protein ligase ARI10	3.25	2	3	585	67.2256	8.38232	1.50697	1.49112	1.14556	1.38122	0.0838217
325145	Uncharacterized WD repeat-containing protein C343.17c	5.56	4	5	593	64.303	5.69385	1.40348	1.34675	1.39114	1.38046	0.00204359
326842	--	3.47	2	2	518	58.0624	7.37158	1.46959	1.31037	1.36082	1.38026	0.0149215
281040	SAGA-associated factor 29	2.84	1	1	387	43.1335	6.75635	1.40529	1.34278	1.39194	1.38	0.00249219
244955	Vacuolar morphogenesis protein 7 homolog	23.37	7	10	368	39.6268	9.68604	1.39456	1.34043	1.40301	1.37933	0.00266032
12734	Uncharacterized transporter C22E12.01	2.07	1	1	483	53.724	8.07471	1.34487	1.38545	1.4012	1.37717	0.00197278
75828	COMPASS component SDC1	30.23	4	8	172	17.7529	7.97217	1.34405	1.43622	1.34548	1.37525	0.00653682
226511	Uncharacterized transcriptional regulatory protein C417.09c	2.24	2	2	671	74.7758	8.35303	1.45987	1.27269	1.3868	1.37312	0.020651
258523	2,2-dialkylglycine decarboxylase	23.18	8	11	466	50.2015	6.03662	1.34735	1.35543	1.41495	1.37258	0.00325628
329336	Chromosome-associated kinesin KIF4A	25.59	37	51	1813	201.448	5.26221	1.37932	1.38555	1.35168	1.37218	0.000780988
330748	Protein frg1	3.48	1	1	287	32.2065	8.32373	1.39695	1.3215	1.39808	1.37218	0.00460312
105634	--	6.3	4	5	730	76.82	7.6792	1.34761	1.472	1.29633	1.37198	0.0190974
226406	Autophagy-related protein 9	3.34	4	4	898	102.538	6.72705	1.35404	1.35641	1.40414	1.37153	0.00192432
332866	--	3.9	1	1	385	41.7214	7.60596	1.28817	1.38867	1.43711	1.37132	0.0136686
350629	Membrane protein TMS1	6.21	2	3	467	50.7798	5.24951	1.39776	1.42307	1.29245	1.37109	0.0114175
220860	RNA polymerase II transcription factor B subunit 3	14.25	4	4	351	39.4878	7.06396	1.36328	1.2951	1.45039	1.36959	0.0144654
239170	3-hydroxybenzoate 6-hydroxylase	3.61	1	2	443	49.4107	5.73193	1.02029	1.73754	1.34938	1.36907	0.216955
340422	--	3.92	1	1	306	32.4186	5.41455	1.39956	1.36098	1.34602	1.36885	0.0018641
259538	Nuclear elongation and deformation protein 1	15.53	12	19	779	85.7497	4.69092	1.38019	1.34808	1.37805	1.36877	0.000789076
96090	WHI2-like protein P4H10.16c	21.69	5	11	295	32.0243	5.14795	1.36782	1.37126	1.36489	1.36799	2.5e-05
223317	Probable catechol O-methyltransferase 2	5.53	1	1	217	23.6374	4.90674	1.37916	1.39494	1.32663	1.36691	0.00315236
275898	Phosphatidylinositol 3,4,5-trisphosphate 3-phosphatase and dual-specificity protein phosphatase PTEN	12.29	7	7	700	75.4466	6.59521	1.37621	1.34244	1.38118	1.36661	0.00110038
108132	FACT complex subunit ctc-2	27.08	27	37	1034	117.58	5.73193	1.3552	1.3712	1.37251	1.3663	0.000230766
320975	2-methylcitrate dehydratase	28.52	7	11	284	30.3531	8.92432	1.33648	1.3504	1.4085	1.36513	0.0036288
251834	Mannitol-1-phosphate 5-dehydrogenase	31.7	9	13	388	43.0879	5.51611	1.39832	1.31987	1.37292	1.3637	0.00401337
336549	--	15.41	1	4	266	28.8894	7.53271	1.31063	1.42355	1.35459	1.36292	0.00809892
217533	Calcium-independent phospholipase A2-gamma	11.57	6	8	648	70.9521	8.57275	1.38716	1.38185	1.31181	1.36027	0.00451115
327302	ATP-dependent bile acid permease	4	8	8	2000	219.149	6.31592	1.26985	1.35436	1.45133	1.35851	0.020724
245142	Ubiquitin-conjugating enzyme E2-34 kDa	25.34	4	5	221	25.0019	4.43701	1.35829	1.40924	1.30683	1.35812	0.00674593
253993	--	29.62	7	11	260	28.9046	6.32861	1.39708	1.3461	1.32671	1.35663	0.00344522
244046	Transcription initiation factor IIA subunit 2	44.25	5	8	113	12.6575	8.44092	1.31275	1.35561	1.40088	1.35641	0.0050574
259618	Putative transcription initiation factor TFIID 111 kDa subunit	5.19	4	5	963	108.072	5.88428	1.34385	1.27786	1.44153	1.35441	0.0175218
219668	Casein kinase I homolog 1	35.65	14	23	460	51.9513	9.39307	1.36449	1.36213	1.33284	1.35316	0.000829835
350899	--	7.89	3	3	418	48.1315	7.00537	1.3224	1.35272	1.38199	1.35237	0.00237529
231016	Formamidopyrimidine-DNA glycosylase	10.38	3	3	318	36.0045	8.96826	1.33059	1.34909	1.37363	1.35111	0.00125811
329780	Sentrin-specific protease 2	2.15	2	2	883	99.8784	7.12256	1.39396	1.34158	1.31146	1.349	0.00473564
323227	--	6.18	1	1	178	20.5315	8.73389	1.39222	1.33277	1.32067	1.34856	0.00400055
217274	Pre-mRNA-splicing factor cwc22	19.54	11	17	568	65.076	5.12256	1.34616	1.32505	1.37315	1.34812	0.00159517
236824	SCF E3 ubiquitin ligase complex F-box protein grrA	8.14	5	5	602	66.9648	6.29053	1.4102	1.27581	1.35827	1.34809	0.0124003
282488	Catechol 1,2-dioxygenase	2.66	1	1	263	29.5296	5.021	1.32166	1.30942	1.40974	1.34694	0.0081922
336592	--	7.97	1	4	577	62.0461	6.34131	1.38197	1.40397	1.2529	1.34628	0.0180177
219073	--	17.68	7	9	475	55.1383	5.41455	1.3336	1.36783	1.33537	1.3456	0.00103462
351491	DNA repair protein rad14	3.31	1	1	393	44.3732	8.89502	1.33954	1.3573	1.33978	1.34554	0.000289587
351552	--	18.24	3	3	159	16.9715	4.95752	1.3781	1.37746	1.27664	1.34407	0.00946495
267758	ISWI chromatin-remodeling complex ATPase ISW2	31.12	32	46	1086	124.631	7.73779	1.35029	1.34346	1.33286	1.3422	0.000219631
325740	--	26.22	3	5	164	18.5636	9.62744	1.32459	1.31916	1.38172	1.34182	0.00340936
296938	Wings apart-like protein homolog 1	4.88	3	4	758	83.4089	9.51025	1.31043	1.37841	1.33624	1.34169	0.00334547
215818	UPF0592 membrane protein C7D4.03c	3.62	4	6	968	106.048	7.76709	1.37961	1.12603	1.51892	1.34152	0.0971551
243701	--	6.9	1	1	116	13.1719	5.45264	1.41976	1.28895	1.31337	1.34069	0.013609
328725	Uncharacterized protein RSN1	5.18	5	5	1140	129.509	7.04932	1.361	1.35247	1.30777	1.34041	0.00234318
106093	--	15.69	9	11	650	68.9492	9.21729	1.32061	1.32158	1.37642	1.33954	0.00293758
338927	E3 ubiquitin-protein ligase TOM1-like	18.51	65	86	3986	444.102	5.08447	1.36834	1.31941	1.3297	1.33915	0.0019231
354229	Meiotically up-regulated gene 80 protein	2.2	1	1	455	50.0738	9.59814	1.30207	1.31837	1.39585	1.33876	0.00721282
101667	Telomere maintenance protein SDE2	12.07	3	3	290	31.8277	5.32568	1.2869	1.39338	1.33386	1.33804	0.0082051
273624	Proteasome subunit beta type-3	32.84	4	9	201	22.0041	5.23682	1.29046	1.40102	1.32168	1.33772	0.0093628
335953	Protein bimA	4.34	3	3	806	89.7033	8.80713	1.40118	1.32911	1.28243	1.33757	0.0103065
328360	--	1.33	1	1	526	59.2934	5.04639	1.21146	1.42648	1.37232	1.33675	0.0348511
60766	Serine/threonine-protein kinase PKH2	5.2	4	5	789	86.952	8.45557	1.38454	1.25808	1.36659	1.3364	0.0135106
278927	--	7.46	3	5	295	33.4297	6.13818	1.29233	1.35212	1.36107	1.33517	0.00411831
215839	Uncharacterized protein C26F1.08c	3.87	4	5	1084	120.065	8.22119	1.32544	1.33232	1.343	1.33359	0.000234481
255340	D-xylose 1-dehydrogenase (NADP(+))	39.85	12	18	389	42.6707	6.03662	1.37062	1.32769	1.30136	1.33322	0.00364978
222490	Protein AF-9 homolog	15	5	6	280	30.9274	7.76709	1.3943	1.29435	1.31069	1.33311	0.00852574
270445	Protein phosphatase 2C homolog C10F6.17c	12.3	4	5	374	40.7075	5.45264	1.37778	1.30075	1.31831	1.33228	0.00488427
225934	DNA-directed RNA polymerase III subunit RPC2	2.42	3	3	1157	130.189	8.47021	1.34441	1.31263	1.33735	1.33146	0.000843426
281521	Beta-peptidyl aminopeptidase BapA	2.48	1	2	322	34.0382	5.40186	1.34003	1.31239	1.34193	1.33145	0.000828458
272234	Mono- and diacylglycerol lipase	19.82	5	15	333	36.0459	4.34814	1.33617	1.3597	1.29668	1.33085	0.00307446
326639	--	9.02	1	1	122	13.4081	9.12939	1.38947	1.29806	1.30486	1.3308	0.00780767
357289	--	24.15	7	12	294	32.7717	5.69385	1.34755	1.33255	1.31214	1.33075	0.000961045
222646	--	16.05	4	8	243	27.5892	6.7417	1.37774	1.30435	1.3093	1.33046	0.00509696
348375	Uncharacterized RNA-binding protein C1861.04c	8.32	9	11	1070	119.926	6.97607	1.33212	1.30724	1.34985	1.32974	0.00140173
277976	Kinetochore protein spc7	1.35	1	1	1255	137.567	5.2876	1.18151	1.51028	1.29604	1.32928	0.0759904
256825	Probable pre-mRNA-splicing factor ATP-dependent RNA helicase prp43	17.06	12	14	768	87.0759	6.7417	1.35798	1.33317	1.29564	1.32893	0.00302138
238988	Pre-mRNA-splicing factor slt-11	6.56	3	3	381	41.4955	8.5874	1.30099	1.25435	1.42682	1.32739	0.0238698
329134	--	2.99	3	5	1169	128.436	8.19189	1.3038	1.34305	1.33259	1.32648	0.00129001
261089	Phosphatidylinositol 4-phosphate 5-kinase its3	10.17	6	7	787	87.8924	9.42236	1.37985	1.31482	1.28449	1.32639	0.00734515
241017	--	9.56	2	3	272	28.4393	6.93213	1.26798	1.34085	1.36986	1.32623	0.0085196
239384	--	7.87	3	3	381	43.8152	5.09717	1.35989	1.38332	1.23497	1.32606	0.0193652
333588	L-xylo-3-hexulose reductase	4.35	1	1	230	23.554	7.79639	1.39443	1.26412	1.31728	1.32528	0.0132564
258574	Uncharacterized protein YAE1	3.98	1	1	251	26.634	4.80518	1.32344	1.25488	1.39645	1.32492	0.0154586
231076	--	4.62	2	2	325	35.6174	9.18799	1.35397	1.22554	1.38905	1.32285	0.022887
283384	--	23.39	6	11	295	31.5917	5.12256	1.26718	1.34622	1.35467	1.32269	0.00737328
265490	UDP-glucose 4-epimerase	17.11	5	6	339	36.6937	6.53662	1.37998	1.27065	1.31722	1.32262	0.00950351
107537	Secreted protein ARB_01864	20.58	11	13	588	67.0738	5.2749	1.27325	1.33302	1.36112	1.32246	0.00639454
102189	--	37.77	8	12	278	30.4435	5.24951	1.31831	1.3216	1.32659	1.32217	5.58e-05
333530	--	4.52	2	2	310	34.2625	9.20264	1.29803	1.30989	1.35751	1.32181	0.00317434
273477	Pre-mRNA-splicing ATP-dependent RNA helicase prp28	11.49	6	7	670	74.8026	8.88037	1.29758	1.39845	1.26896	1.32166	0.0145791
333966	Protein AIM2	18.47	4	8	249	27.573	6.16357	1.32184	1.37846	1.26381	1.32137	0.0104421
323777	Cullin-1	9.47	1	1	169	19.434	5.22412	1.41271	1.17509	1.3743	1.3207	0.0488965
49060	AMSH-like protease sst2	8.01	3	3	462	52.411	7.02002	1.32164	1.29522	1.34472	1.32053	0.00198433
336452	Vacuolar amino acid transporter 3	8.87	5	6	755	82.1914	7.41553	1.27045	1.37198	1.31868	1.32037	0.0082733
227460	Fatty acid transporter protein	5.51	3	3	635	70.612	8.77783	1.38214	1.33473	1.23939	1.31875	0.0169039
270176	Transcription factor IWS1	31.89	11	14	417	46.1982	9.65674	1.26275	1.36861	1.3181	1.31649	0.00920255
348542	Probable L-tyrosine/L-aspartate decarboxylase	0.73	1	1	1092	120.396	5.18604	1.06702	1.64696	1.23465	1.31621	0.20791
275158	Bis(5'-nucleosyl)-tetraphosphatase	36.89	7	8	225	24.7343	5.50342	1.26599	1.33492	1.34603	1.31565	0.00623221
266121	NAD-dependent protein deacetylase hst1	12.87	6	7	575	62.6559	6.59521	1.34069	1.28104	1.32327	1.315	0.00314506
216174	Protein BOI2	16.65	14	17	943	101.316	9.01221	1.32354	1.28679	1.33397	1.31477	0.0020605
215770	Protein csx2	6.34	5	5	868	95.8397	8.77783	1.39825	1.29016	1.25528	1.31456	0.0182106
328339	Uncharacterized ATP-dependent helicase C17A2.12	1.6	1	1	563	64.0422	6.68311	0.916564	1.72971	1.29642	1.31423	0.312817
325387	--	7.74	2	4	323	33.0324	5.09717	1.21452	1.39145	1.33293	1.31297	0.0265522
249421	--	21.44	8	11	499	53.9596	6.25244	1.32694	1.31027	1.30062	1.31261	0.000604342
253233	ATP-dependent DNA helicase II subunit 1	0.93	1	1	644	72.3518	5.84619	1.32995	1.24486	1.36159	1.31213	0.0122398
329777	Probable phospholipase C1020.13c	2.11	2	2	899	98.9849	7.37158	1.32399	1.18048	1.42933	1.31127	0.0497152
346534	Transcriptional regulatory protein SIN3	19.68	24	29	1448	161.232	6.59521	1.2997	1.32366	1.30975	1.31104	0.000498157
252160	Histidinol-phosphate aminotransferase	34.11	12	33	428	45.8936	6.03662	1.29582	1.37519	1.26166	1.31089	0.0114982
245216	Aromatic amino acid aminotransferase C56E4.03	22.05	9	10	635	70.1853	6.32861	1.28317	1.33503	1.31398	1.31073	0.00234037
326388	Probable inositol polyphosphate 5-phosphatase C9G1.10c	6.45	8	9	1100	121.515	8.32373	1.40221	1.21059	1.31751	1.3101	0.0305057
257341	ATP-dependent zinc metalloprotease FtsH 2	58.68	39	101	714	81.3346	5.60498	1.33538	1.30682	1.28587	1.30935	0.00214497
66968	Uncharacterized protein C2F7.07c	0.87	1	1	1608	173.072	6.90283	1.31542	1.28217	1.32695	1.30818	0.00189191
326461	Septum-promoting GTP-binding protein 1	8.02	2	2	237	26.6026	8.70459	1.33021	1.28677	1.30714	1.30804	0.00165494
238871	Peptidyl-prolyl cis-trans isomerase-like 4	9.55	4	4	398	44.5653	5.0083	1.31176	1.29007	1.31684	1.30622	0.000717909
332086	UPF0696 protein C11orf68 homolog	15.67	4	4	319	34.9297	6.18896	1.27747	1.38065	1.25966	1.30593	0.0148606
222671	--	5.67	1	1	194	21.3587	4.97021	1.2497	1.41452	1.25343	1.30588	0.030127
333011	ATP-dependent (S)-NAD(P)H-hydrate dehydratase	66.08	15	23	339	36.2817	6.07471	1.30175	1.34721	1.26413	1.30437	0.00617084
96511	ERAD-associated E3 ubiquitin-protein ligase doa10	1.03	1	1	1546	171.282	6.01123	1.40314	1.28224	1.22552	1.30364	0.0284926
282584	Uncharacterized RING finger protein P8B7.15c	2.28	1	1	615	67.7411	6.50732	1.28883	1.29894	1.32069	1.30282	0.000961831
352388	Putative oxidoreductase TDA3	14.16	6	7	466	49.2802	6.53662	1.35035	1.25856	1.29931	1.30274	0.00760475
255222	Glycerol-3-phosphate dehydrogenase, mitochondrial	22.22	12	15	684	75.7711	7.91357	1.31167	1.28277	1.31345	1.30263	0.00107758
236021	F-box/WD repeat-containing protein pof11	2.81	2	2	925	100.234	8.1333	1.23406	1.33115	1.34029	1.30183	0.0124435
107379	Inulinase	8.51	5	31	529	57.3146	4.69092	1.25793	1.27038	1.37623	1.30151	0.0151417
236682	DNA repair protein rhp54	1.75	1	1	798	90.1368	8.60205	1.38933	1.32567	1.18877	1.30126	0.0364769
266212	Putative methyltransferase DDB_G0268948	43.28	12	19	305	34.051	5.57959	1.30022	1.30927	1.29198	1.30049	0.00027599
233884	--	8	1	1	175	18.6093	4.65283	1.31791	1.30658	1.275	1.29983	0.00182893
226136	--	2.7	2	2	890	95.8136	8.86572	1.29394	1.33314	1.27171	1.2996	0.00357364
66420	--	1.81	1	1	387	40.1596	5.5542	1.25885	1.27503	1.36475	1.29954	0.0118753
328741	Phosphatidylinositol 4-kinase lsb6	7.23	6	7	719	80.3029	7.43018	1.3144	1.28055	1.30365	1.29953	0.0011093
235643	GTPase-activating protein BEM3	1.34	2	2	1348	146.208	7.47412	1.31062	1.20462	1.38289	1.29938	0.028623
226198	Protein argonaute-3	17.38	15	22	938	104.078	9.36377	1.30296	1.2726	1.32045	1.29867	0.00218336
227061	Uncharacterized transcriptional regulatory protein C139.03	12.65	7	8	664	75.1207	6.97607	1.31581	1.33322	1.24407	1.2977	0.00829434
229612	1,3-beta-glucanosyltransferase gel2	8.26	3	9	436	46.3409	4.18311	1.16394	1.25459	1.47427	1.2976	0.0839433
252538	Uncharacterized protein C3H8.04	2.03	1	1	541	58.5808	9.81787	1.25782	1.21346	1.41671	1.296	0.0408091
353002	--	3.47	2	2	605	65.6774	9.64209	1.23634	1.22816	1.42246	1.29565	0.043096
219283	N-acyl-phosphatidylethanolamine-hydrolyzing phospholipase D	1.35	1	1	446	49.5049	6.69775	1.2246	1.28937	1.3708	1.29492	0.0199541
107437	--	16.58	7	17	929	103.154	7.85498	1.25062	1.32716	1.30559	1.29445	0.00593495
235879	DNA polymerase delta catalytic subunit	6.34	8	8	1104	124.173	8.51416	1.34125	1.24901	1.29272	1.29433	0.00809321
215414	DNA-directed RNA polymerase II subunit rpb1	21.55	33	56	1745	192.376	6.0874	1.33679	1.26095	1.28437	1.29404	0.0057628
352213	--	4.68	2	2	385	40.6214	5.51611	1.24621	1.19071	1.4438	1.29357	0.0621348
336270	--	4	2	2	650	69.751	6.31592	1.18906	1.28137	1.40998	1.29347	0.0444918
333262	SWR1-complex protein 4	5.3	2	2	509	57.9707	9.18799	1.26564	1.31498	1.29914	1.29325	0.00245028
285834	--	27.08	2	2	96	11.0386	5.38916	1.25659	1.32398	1.29916	1.29324	0.0044727
278048	ATP-dependent bile acid permease	4.23	6	7	1372	152.128	5.77002	1.41119	1.19447	1.27332	1.29299	0.0436804
350688	Cytochrome P450 61	19.27	12	19	716	80.3254	6.69775	1.33429	1.21408	1.33054	1.29297	0.0176624
263350	--	9.88	6	6	587	64.9883	6.31592	1.27391	1.29805	1.30675	1.2929	0.00112248
281816	S-methyl-5'-thioadenosine phosphorylase	38.78	11	24	312	34.0211	6.41748	1.32284	1.27381	1.28203	1.29289	0.00266822
216981	Chromatin-remodeling complexes subunit NGG1	11.61	6	7	672	74.7859	5.21143	1.2108	1.39909	1.26799	1.29263	0.034413
333348	--	7.89	4	4	545	61.0009	7.94287	1.21822	1.29797	1.36035	1.29218	0.0192452
245652	Tat-binding homolog 7	11.25	16	22	1564	171.3	5.45264	1.35584	1.25045	1.26677	1.29102	0.0124286
250046	--	8.72	6	7	837	92.2298	5.41455	1.34581	1.23584	1.29045	1.2907	0.0117167
338518	DNA mismatch repair protein PMS1	0.56	1	1	1080	118.586	5.05908	1.34599	1.22709	1.29861	1.29057	0.0138517
217618	--	9.88	5	5	587	65.8078	6.58057	1.31321	1.27576	1.27998	1.28965	0.00166723
252814	Vacuolar segregation protein PEP7	1.61	1	1	434	48.0047	8.49951	1.37262	1.2008	1.29411	1.28918	0.0282457
251795	Long-chain-fatty-acid--CoA ligase 1	42.24	26	49	689	74.8531	7.75244	1.33655	1.26934	1.26033	1.28874	0.00686333
253716	Transcription initiation factor IIF subunit alpha	8.19	5	7	647	71.6103	9.29053	1.25269	1.3595	1.25096	1.28772	0.0152093
352162	--	11.23	5	6	543	59.7053	5.73193	1.33189	1.2429	1.28639	1.28706	0.00791466
226731	b(0,+)-type amino acid transporter 1	4.24	1	1	448	47.5423	6.15088	0.97916	1.6258	1.25596	1.28697	0.265195
271477	Cullin-4B	17.04	13	15	769	87.329	8.38232	1.33103	1.24226	1.28625	1.28651	0.0079055
272986	Protein EFR3	6.01	5	5	1031	112.188	8.49951	1.34205	1.21213	1.30293	1.28571	0.0176629
244875	--	4.47	1	1	246	26.0708	9.42236	1.27577	1.27758	1.30356	1.28563	0.000985969
352350	--	3.11	1	1	354	38.9262	7.89893	1.1313	1.37242	1.35298	1.28557	0.0661512
219978	Transcription initiation factor IIA large subunit	10.05	5	6	418	44.9007	4.75439	1.17938	1.43517	1.24114	1.28523	0.0658618
271975	Uncharacterized ATP-dependent helicase C144.05	0.7	1	1	1137	128.53	6.84424	1.37943	1.26305	1.2124	1.28496	0.0288154
68728	--	2.08	2	2	1396	158.499	6.771	1.26547	1.23846	1.34998	1.28463	0.0136418
272906	E3 ubiquitin-protein ligase RNF13	2.46	1	1	691	75.1213	6.82959	1.28055	1.35159	1.22128	1.28447	0.0170867
354122	Uncharacterized protein YIR042C	7.47	1	1	241	26.8073	6.21436	1.27039	1.31793	1.26389	1.28407	0.00357603
269270	Meiotically up-regulated gene 137 protein	12.73	4	5	440	48.8281	9.1001	1.24412	1.33917	1.26868	1.28399	0.00991195
329985	Ras-related protein Rab-2A	19.77	4	8	263	28.5183	6.69775	1.2819	1.29483	1.27481	1.28385	0.000426305
105578	Vacuolar protein 8	25.51	10	20	537	57.9928	4.86865	1.24629	1.29266	1.312	1.28365	0.00469075
329803	Ubiquitin fusion degradation protein 1	36.26	12	18	364	39.6115	9.37842	1.32323	1.23002	1.29738	1.28354	0.00946495
106296	--	6.46	5	5	666	74.4529	9.42236	1.26277	1.29517	1.28985	1.2826	0.00125796
255863	Trafficking protein particle complex subunit 13	8.06	3	4	360	39.2314	5.17334	1.33834	1.24911	1.26025	1.28257	0.00972527
231204	Uncharacterized zinc-type alcohol dehydrogenase-like protein YogA	9.35	2	3	353	37.4179	9.0415	1.32249	1.20581	1.31898	1.28242	0.0179182
222390	Pre-mRNA-splicing factor cwf16	15.97	4	6	288	32.8806	6.43018	1.26782	1.2827	1.29673	1.28241	0.000872332
350244	DNA topoisomerase 2	16.85	31	47	1840	204.245	7.03467	1.30027	1.27349	1.27198	1.28191	0.00106014
251284	--	13.96	6	6	437	48.515	6.62451	1.24074	1.36343	1.2412	1.28179	0.020348
325539	--	5.05	3	5	752	80.6572	3.97998	1.15222	1.34908	1.3428	1.28137	0.0488782
352754	Polyadenylate-binding protein-interacting protein 7	5.07	2	4	691	74.7323	6.94678	1.27366	1.31692	1.25336	1.28132	0.00440921
223302	Probable maintenance of ploidy protein mob1	23.19	4	5	207	24.0549	6.39209	1.28307	1.30437	1.25417	1.28054	0.00267708
349023	Uncharacterized protein C12G12.12	7.84	3	3	421	46.1531	5.41455	1.31744	1.26211	1.26204	1.28053	0.0043007
216903	Uncharacterized protein C18H10.09	5.18	2	2	676	74.5787	7.89893	1.30433	1.3531	1.18377	1.2804	0.030735
358207	Meiotically up-regulated gene 89 protein	23.98	10	14	417	46.2204	8.23584	1.26524	1.25818	1.31737	1.28027	0.00440568
100715	MAP kinase kinase MKK2/SSP33	31.81	13	21	481	52.0791	7.48877	1.28807	1.31445	1.23793	1.28015	0.00635564
325137	Serine palmitoyltransferase 2	9.92	6	9	655	72.3509	8.39697	1.3076	1.2803	1.25233	1.28008	0.00322975
337728	Agglutinin-like protein ARB_02240	1.84	1	1	707	72.1946	4.44971	1.19693	1.27912	1.3607	1.27892	0.0275467
100480	DNA-directed RNA polymerase II subunit RPB9	50.38	5	7	131	14.7408	6.84424	1.26713	1.2605	1.30847	1.2787	0.00288747
231721	--	5.06	2	2	356	40.6592	6.26514	1.27793	1.25715	1.30052	1.27853	0.00201603
216695	Uncharacterized AAA domain-containing protein C328.04	3.45	2	3	782	86.003	9.48096	1.20275	1.32543	1.3069	1.27836	0.018301
227072	Peroxisomal acyl-coenzyme A oxidase 1	4.61	2	2	694	77.8201	8.67529	1.25273	1.27269	1.30911	1.27818	0.00350275
349735	--	2.49	1	1	441	48.9485	6.53662	1.13075	1.37471	1.32871	1.27806	0.065416
219200	Hsp90 co-chaperone Cdc37	47.01	21	31	502	55.2456	4.91943	1.32379	1.32024	1.19009	1.27804	0.0241233
333632	Phosphoenolpyruvate carboxykinase	26.62	13	19	556	61.6627	5.87158	1.32859	1.2628	1.24175	1.27771	0.00875267
333738	Putative esterase C31F10.02	10.45	2	2	220	24.5975	9.31982	1.27897	1.25359	1.29847	1.27701	0.00219283
219175	Calcium uniporter protein 5, mitochondrial	3.8	2	2	447	51.4367	5.51611	1.35353	1.17025	1.30609	1.27662	0.0372317
106339	--	28.53	8	9	347	37.2106	5.79541	1.20666	1.29725	1.32589	1.2766	0.0164608
278146	UPF0183 protein At3g51130	6.08	2	2	378	41.5946	5.2876	1.26962	1.29111	1.26884	1.27652	0.000695408
275129	--	13.33	1	1	105	11.5759	7.28369	1.2977	1.25564	1.27584	1.27639	0.00192499
325798	DNA ligase 1	14.48	11	13	884	97.5161	6.75635	1.28181	1.24709	1.30004	1.27632	0.00314422
271035	--	0.96	1	1	1046	112.609	8.35303	1.35139	1.30033	1.17719	1.2763	0.0332738
238783	Probable phosphatase PSR2	21.76	6	13	432	46.3234	6.7124	1.2536	1.28072	1.29386	1.27606	0.0018387
330823	PX domain-containing protein YPT35	11.57	3	4	337	37.624	5.68115	1.23067	1.28453	1.31217	1.27579	0.00744552
268136	Uncharacterized protein YNL011C	12.53	6	6	447	48.3854	6.55127	1.24527	1.2356	1.34627	1.27571	0.0160774
248195	Ino eighty subunit 1	8.26	6	7	702	78.1538	5.70654	1.2866	1.27636	1.26391	1.27563	0.00056606
321248	--	11.54	1	1	104	11.5357	5.05908	1.31622	1.21945	1.29072	1.27546	0.0108704
105588	Probable mitochondrial chaperone BCS1-B	42.63	20	30	556	61.8316	8.26514	1.3047	1.25845	1.26272	1.27529	0.00286102
280977	Serine/threonine-protein kinase ppk4	3.56	4	5	1010	112.844	6.07471	1.26455	1.29191	1.26925	1.27524	0.000940781
218763	--	6.65	3	3	466	53.0394	6.58057	1.24108	1.27999	1.30428	1.27512	0.00444638
330656	Uncharacterized endoplasmic reticulum membrane protein C1709.03	17.17	5	9	396	41.5159	5.74463	1.26688	1.26925	1.28844	1.27486	0.000616238
243035	Transcription initiation factor TFIID subunit 10	22.27	3	4	211	21.6348	5.63037	1.21242	1.26302	1.34797	1.27447	0.0201336
237142	PAB-dependent poly(A)-specific ribonuclease subunit PAN3	6.87	5	6	670	74.8149	8.17725	1.30788	1.25484	1.25874	1.27382	0.00386288
220097	Lipoyl synthase, mitochondrial	2.65	1	1	415	45.8777	9.18799	1.26436	1.2639	1.29225	1.2735	0.0011731
226405	Putative serine/threonine-protein kinase YPL150W	1.3	1	2	848	94.2443	9.48096	1.32906	1.19148	1.29979	1.27345	0.022627
350989	Ubiquitin and WLM domain-containing metalloprotease SPCC1442.07c	2.08	1	1	385	41.5816	6.53662	1.32801	1.17442	1.31471	1.27238	0.0310277
325144	UPF0047 protein C4A8.02c	38.52	4	5	122	13.4347	5.26221	1.30356	1.22675	1.28537	1.2719	0.00718652
325672	Separin	0.73	1	4	2723	297.517	8.23584	1.1468	1.40663	1.26177	1.27173	0.0687324
227304	Signal recognition particle receptor subunit alpha homolog	17.55	9	12	644	69.745	8.42627	1.28002	1.2398	1.29376	1.27119	0.00354517
271596	--	1.95	1	1	512	57.5045	7.32764	1.29923	1.31526	1.19828	1.27092	0.0177793
275306	DNA damage-inducible protein 1	42.12	14	35	444	47.762	5.2749	1.27652	1.28674	1.24662	1.26996	0.00198171
349846	--	6.93	2	9	303	29.2491	4.88135	1.17953	1.29848	1.3313	1.26977	0.0279859
267458	DNA-directed RNA polymerase II subunit RPB2	27.15	29	45	1175	132.593	7.97217	1.31881	1.23662	1.25375	1.26973	0.00850542
221098	Nucleoporin GLE2	51.37	16	27	364	40.0647	8.20654	1.32406	1.22387	1.2608	1.26958	0.0115726
244838	Uncharacterized transcriptional regulatory protein C3C7.04	2.52	1	2	556	61.2483	7.88428	1.1893	1.2416	1.37498	1.26862	0.0398341
223351	Isochorismatase domain-containing protein 1	23.23	4	5	198	21.2001	5.85889	1.27497	1.23874	1.29152	1.26841	0.00335507
271991	Protection of telomeres protein 1	3.74	2	2	589	66.5837	7.54736	1.29316	1.25178	1.26018	1.26837	0.00220657
331437	--	2.61	2	2	727	70.9032	4.42432	0.985074	0.853453	1.96615	1.26822	0.524636
227353	Peroxisomal targeting signal receptor	12.92	6	6	627	68.8919	4.98291	1.33264	1.23343	1.23697	1.26768	0.0144203
333916	Putative general negative regulator of transcription C16C9.04c	10.46	4	17	1472	156.287	9.20264	1.26802	1.21791	1.31586	1.26726	0.0110101
31187	--	2.48	1	1	484	52.3818	5.79541	1.28046	1.28267	1.23661	1.26658	0.00315051
283714	Probable glucan endo-1,3-beta-glucosidase btgC	19.19	5	6	422	45.3549	4.64014	1.26135	1.23461	1.30162	1.26586	0.00532396
99302	Ingression protein fic1	1.01	1	1	893	96.1004	8.82178	1.19014	1.50547	1.10129	1.26563	0.16266
332792	Tip elongation protein 1	3.75	2	2	801	85.974	5.50342	1.28753	1.2931	1.21598	1.26554	0.00863228
220915	Transcription initiation factor IIE subunit alpha	3.3	1	1	394	44.3151	4.83057	1.3697	1.19654	1.22946	1.26523	0.0378105
281234	Protein pacG	4.95	2	2	485	53.2779	5.97314	1.22481	1.25214	1.31869	1.26521	0.0108701
272948	Helicase SEN1	1.28	2	2	1875	209.441	8.49951	1.27134	1.23827	1.28546	1.26503	0.00277257
238834	--	7.86	3	3	458	50.2556	5.73193	1.26273	1.22073	1.31143	1.26496	0.00963991
324212	--	8.77	1	1	114	11.8396	4.64014	1.2625	1.26854	1.26353	1.26486	4.95e-05
231256	--	5.31	2	2	320	36.0631	5.90967	1.2489	1.30656	1.23694	1.26414	0.00655561
221004	AB hydrolase superfamily protein C1039.03	12.91	4	5	333	36.8146	6.12549	1.25641	1.32264	1.21204	1.2637	0.0145271
332638	--	2.56	3	5	1173	126.34	9.90576	1.34088	1.17367	1.27343	1.26266	0.0325331
219255	WD repeat-containing protein JIP5	1.64	1	1	426	45.3385	5.2876	1.25056	1.21021	1.32596	1.26224	0.016322
71879	--	1.11	1	1	992	110.18	6.31592	1.16236	1.34062	1.28224	1.26174	0.0379123
351359	--	2.96	1	1	406	44.2619	5.03369	1.23114	1.31264	1.23913	1.26097	0.00973386
331591	GTPase-activating protein	12.9	9	11	752	86.4587	6.58057	1.21987	1.2409	1.32052	1.26043	0.0135733
231067	--	2.99	1	1	402	44.6475	8.95361	1.27488	1.25493	1.25142	1.26041	0.000785873
231920	Putative aminoacrylate hydrolase RutD	3.55	1	1	310	34.8972	4.79248	1.27144	1.24664	1.26264	1.26024	0.000777153
349638	Ubiquitination network signaling protein acrB	2.93	3	3	923	100.667	8.29443	1.30441	1.1971	1.27906	1.26019	0.0151399
108608	--	16.47	5	12	425	44.4175	9.75928	1.2159	1.25114	1.31328	1.26011	0.0117675
290073	Aspartic-type endopeptidase ctsD	7.45	2	3	416	42.4817	4.25928	1.16809	1.42854	1.18056	1.25906	0.0925506
251007	Protein IVY1	7.19	3	4	473	49.7148	5.33838	1.27162	1.26208	1.24153	1.25841	0.00117871
244938	Protein FYV10	15.56	6	7	405	46.1158	7.59131	1.32413	1.14611	1.30409	1.25811	0.0444283
273308	--	1.23	1	1	812	88.2983	6.32861	1.12685	1.34156	1.30585	1.25809	0.0603076
271492	H(+)/Cl(-) exchange transporter 5	0.98	1	1	713	77.2459	6.43018	1.29967	1.23325	1.24061	1.25784	0.00658168
114819	Jerky protein homolog-like	1.9	1	1	527	59.552	9.21729	1.31032	1.24528	1.21723	1.25761	0.0112614
273146	Rho1 guanine nucleotide exchange factor 1	15.56	18	21	1215	136.092	8.89502	1.29114	1.23808	1.24212	1.25711	0.0043698
332795	--	10.06	4	8	477	53.2698	5.33838	1.25146	1.24442	1.27449	1.25679	0.00124774
221220	Peroxisomal targeting signal 2 receptor	3.8	1	1	368	40.2009	6.59521	1.26377	1.24827	1.25728	1.25644	0.00030694
220385	Hormone-sensitive lipase	1.86	1	1	322	35.1362	6.45557	1.28277	1.22256	1.26351	1.25628	0.00476399
29908	Ubiquitin-like protein ATG12	10.94	1	1	128	13.7933	8.1333	1.27026	1.22451	1.27402	1.25626	0.0038345
253076	Protein YIP5	7.22	1	1	263	28.8297	5.021	1.07015	1.5315	1.1645	1.25538	0.211212
232044	SWR1-complex protein 5	3.44	1	1	349	37.3793	4.94482	1.25567	1.28157	1.22878	1.25534	0.00354313
105745	--	0.56	1	1	1605	177.574	6.93213	1.24603	1.31857	1.20093	1.25518	0.0175568
45459	Programmed cell death protein 6	20.72	5	8	251	28.7731	6.15088	1.26045	1.29167	1.21334	1.25515	0.00786789
240045	Secreted beta-glucosidase sun1	4.48	2	3	424	43.7643	4.52588	1.30194	1.16596	1.29727	1.25506	0.029204
327925	Splicing factor 3A subunit 2	38.31	6	8	248	27.9612	9.15869	1.29814	1.27546	1.19054	1.25471	0.0161317
259697	Secondary metabolism regulator laeA	6.75	1	2	163	18.7145	8.17725	1.27313	1.31454	1.17595	1.25454	0.0250618
322172	Autophagy-related protein 18	9.28	1	1	97	10.4601	5.0083	1.31698	1.22044	1.22489	1.2541	0.0149889
266259	Uncharacterized protein C167.05	13.11	8	8	671	72.7172	9.61279	1.26279	1.23722	1.26201	1.25401	0.00109072
283348	60S ribosomal protein L12	61.64	1	43	159	16.9383	9.61279	0.87798	1.63834	1.2446	1.25364	0.367348
334501	Probable beta-glucosidase I	4.06	1	3	837	91.0612	6.06201	1.14974	1.41086	1.20021	1.2536	0.0866917
11331	TBC domain-containing protein C4G8.04	0.92	1	1	977	106.641	7.95752	1.22754	1.34345	1.1879	1.25296	0.0323922
108157	Methyltransferase-like protein 7B	2.5	1	1	280	31.2728	6.84424	1.28304	1.20544	1.26993	1.25281	0.00888159
341592	Autophagy-related protein 22	3.01	2	2	664	72.6904	6.29053	1.39349	1.19411	1.17055	1.25272	0.0701572
102810	--	18.47	7	14	379	41.9197	5.8208	1.24391	1.30231	1.20851	1.25158	0.0116119
350986	--	3.8	8	8	2498	275.056	9.0708	1.25027	1.24523	1.2592	1.25156	0.000263492
255380	Transcription factor 25	13.19	8	11	743	83.9385	5.24951	1.21155	1.29544	1.24685	1.25128	0.00923688
343786	--	2.23	1	1	448	48.8402	6.18896	1.17059	1.32376	1.25936	1.25124	0.0298444
262121	Uncharacterized protein YukJ	53.31	13	21	347	37.4851	4.93213	1.23412	1.26889	1.25024	1.25108	0.00159789
326149	--	17.04	3	6	223	23.0206	9.94971	1.1486	1.37314	1.23113	1.25096	0.0619876
220556	Flap endonuclease 1	10.46	4	6	392	44.7802	7.95752	1.34335	1.24669	1.16124	1.25042	0.0414054
222065	Peroxiredoxin C1773.02c	51	13	22	251	26.302	9.1001	1.24518	1.27825	1.22747	1.2503	0.00351574
267561	Cell division cycle-related protein res1/sct1	5.6	3	3	625	70.3554	6.78564	1.34304	1.18768	1.21958	1.2501	0.0340584
219143	Histone deacetylase phd1	6.16	2	3	487	54.5069	5.97314	1.26999	1.27782	1.20034	1.24938	0.00961133
228009	Fizzy-related protein homolog	2.97	1	1	573	63.2361	9.94971	1.24093	1.25316	1.25004	1.24804	0.000218391
99155	Versicolorin B synthase	11.67	4	5	480	51.086	4.71631	1.23817	1.27109	1.23343	1.24757	0.00228087
281645	Non-canonical poly(A) RNA polymerase PAPD5	9.21	5	6	543	60.8127	8.36768	1.28058	1.20792	1.25267	1.24706	0.00725763
61307	E3 ubiquitin-protein ligase RNF216	2.35	2	2	637	70.7601	6.66846	1.31621	1.15526	1.26942	1.24696	0.0354813
328035	Glycerol 2-dehydrogenase (NADP(+))	30.34	8	11	290	32.2247	6.65381	1.23848	1.263	1.23858	1.24669	0.00109118
249812	Endopolyphosphatase	12.56	7	9	661	75.4162	6.48096	1.23844	1.23225	1.26884	1.24651	0.00209722
225554	DNA-directed RNA polymerase III subunit RPC1	0.96	1	2	1452	161.359	8.30908	1.22223	1.20239	1.3148	1.24647	0.0191865
218649	Set1 complex component ash2	12.86	6	6	552	61.4114	5.8335	1.25858	1.26884	1.21131	1.24624	0.00513571
230621	Uncharacterized protein C800.11	3.1	1	1	323	35.3743	4.18311	1.21015	1.22445	1.30314	1.24591	0.0135396
234606	Nudix hydrolase 1	8.4	1	2	131	14.5354	4.95752	1.18605	1.29582	1.25505	1.24564	0.0165855
244964	Transcriptional repressor rco-1	51.68	26	57	596	64.0247	6.62451	1.31736	1.23302	1.1863	1.24556	0.0235327
330932	Recoverin family protein DDB_G0274781	7.05	6	7	964	108.809	5.41455	1.25881	1.1969	1.2808	1.2455	0.0103055
327126	--	4.42	10	12	2083	230.882	4.99561	1.25303	1.24884	1.23366	1.24518	0.000575414
221335	3-dehydroshikimate dehydratase	1.74	1	1	344	38.0331	5.45264	1.22228	1.29923	1.21397	1.24516	0.0120357
101539	--	3.04	1	1	362	39.8006	8.44092	1.30208	1.22522	1.20799	1.2451	0.0136399
339324	Extracellular exo-alpha-(1->5)-L-arabinofuranosidase	7.01	3	3	371	40.8272	6.771	1.29156	1.2049	1.23296	1.24314	0.0108455
350361	--	1.54	1	1	584	65.5059	5.47803	1.16883	1.332	1.22586	1.24223	0.0368168
334847	--	2.69	1	3	631	70.5214	9.5249	1.27948	1.1641	1.28246	1.24202	0.0249574
329680	Rpb7-binding protein seb1	16.17	10	16	668	71.358	9.94971	1.22324	1.18183	1.32054	1.24187	0.0276963
344390	Putative dipeptidase CPC735_014430	32.49	12	30	397	43.7187	5.19873	1.21994	1.23219	1.27291	1.24168	0.00436017
333967	N-acyl homoserine lactonase AttM	5.01	2	3	339	37.4924	5.63037	1.18102	1.30051	1.24269	1.2414	0.0198189
333814	Protein zds1	6.61	3	3	817	91.9084	7.25439	1.20171	1.20079	1.32159	1.24136	0.0265281
342124	Uncharacterized acyltransferase C1718.04	25.38	24	28	1127	124.281	9.1001	1.23621	1.22141	1.26482	1.24081	0.00278837
246151	FACT complex subunit ctc-1	27.72	13	23	552	62.2254	4.93213	1.22714	1.22045	1.27413	1.24058	0.00489295
241697	tRNA (guanine-N(7)-)-methyltransferase	3.87	1	1	284	32.3411	8.07471	1.13206	1.29117	1.29846	1.24056	0.0473461
338532	Monopolin complex subunit pcs1	11.63	2	2	258	28.6869	6.07471	1.25351	1.24296	1.2222	1.23956	0.00147069
226892	Pyrimidine pathway regulatory protein 1	5.26	3	4	646	72.7552	7.47412	1.27195	1.17877	1.26756	1.23943	0.0156974
348793	--	3.03	2	3	628	67.0973	5.79541	1.22703	1.22079	1.27029	1.23937	0.00420182
224064	D-tyrosyl-tRNA(Tyr) deacylase	6.38	1	1	141	15.2719	6.13818	1.17972	1.31601	1.22171	1.23915	0.0272409
245601	GTP cyclohydrolase 1	8.6	2	2	221	24.8159	7.72314	1.2095	1.27984	1.22539	1.23824	0.00789833
216132	DNA ligase 4	7.75	6	6	929	106.182	7.28369	1.24194	1.21268	1.25993	1.23818	0.00332549
235432	Chromodomain helicase hrp3	5.54	8	8	1626	186.739	6.26514	1.11871	1.33424	1.25933	1.23743	0.0640699
104546	Sterol regulatory element-binding protein 1	45.63	9	19	252	27.7018	9.62744	1.17147	1.28771	1.25045	1.23654	0.0203495
349168	Midasin	0.2	1	1	4953	552.026	5.18604	1.29926	1.21518	1.19332	1.23592	0.0182261
334517	--	12.88	3	5	295	32.9419	7.23975	1.18131	1.28288	1.24262	1.2356	0.0153482
276119	Chromatin modification-related protein eaf3	29.67	6	8	300	34.9094	5.89697	1.21331	1.32127	1.17211	1.23556	0.0338429
331085	La-related protein 1A	35.38	28	42	992	105.969	7.92822	1.23667	1.2206	1.24885	1.23537	0.00120638
283760	Ubiquitin carboxyl-terminal hydrolase 6	63.14	29	74	567	62.7599	5.79541	1.22038	1.24415	1.24063	1.23505	0.000991268
278369	--	18.85	7	8	435	47.3028	6.81494	1.2136	1.25837	1.23172	1.23456	0.00305823
333839	Endopolygalacturonase E	4.3	1	1	349	36.522	4.17041	1.00907	1.47782	1.21346	1.23345	0.227474
215415	Lid2 complex component lid2	5.2	9	9	1596	179.852	7.12256	1.272	1.18763	1.23933	1.23299	0.0109312
281346	BRCT-containing protein 1	7.72	4	5	803	90.4779	8.73389	1.20819	1.25269	1.23609	1.23232	0.00310835
256926	Uncharacterized alpha-1,2-galactosyltransferase C8D2.17	1.86	1	1	323	36.3558	9.14404	1.26196	1.19192	1.24309	1.23232	0.00801415
220392	ATP-dependent RNA helicase FAL1	37.16	10	25	401	45.5241	6.1001	1.27095	1.22354	1.20138	1.23196	0.00773456
333649	--	19.1	9	10	445	47.448	8.63135	1.22882	1.2662	1.19974	1.23158	0.00682829
258127	Uncharacterized protein YIL156W-B	13.7	1	2	73	7.83218	9.31982	1.13782	1.24765	1.3081	1.23119	0.0434639
326596	--	4.94	3	3	567	61.4141	8.48486	1.24565	1.1833	1.26455	1.23116	0.0110899
261921	--	1.62	1	1	431	50.2505	7.63525	1.31728	1.2157	1.15878	1.23059	0.038122
326318	Putative mevalonate kinase	8.9	1	8	472	51.6496	5.89697	1.26462	1.17182	1.25513	1.23052	0.0159622
354504	Ribosome production factor 1	6.58	1	1	319	36.2533	6.81494	1.17713	1.35712	1.15693	1.23039	0.0685309
258795	Heat shock protein 78, mitochondrial	22.02	14	22	731	81.0969	5.75732	1.27498	1.23378	1.17796	1.22891	0.0147489
295837	MAP-homologous protein 1	8.53	6	9	1173	126.955	6.68311	1.20852	1.20098	1.2762	1.22857	0.0107706
283106	--	3.17	3	3	916	100.452	8.11865	1.23615	1.12253	1.3269	1.22853	0.0608801
265437	Alpha-xylosidase	9.22	6	7	759	84.7924	6.0874	1.27568	1.17761	1.23184	1.22838	0.0150782
352852	--	9.02	2	3	244	26.5966	11.3706	1.18625	1.24483	1.25284	1.22798	0.00836922
103384	Aspartic protease pep1	71.17	1	60	444	48.0363	4.83057	1.12123	1.33066	1.23096	1.22762	0.0639069
249790	Spermatogenesis-associated protein 20	20.25	14	20	785	86.8877	5.46533	1.21888	1.24127	1.2221	1.22741	0.00094288
256167	Uncharacterized family 31 glucosidase ORF2 (Fragment)	1.66	1	1	664	74.868	5.45264	1.23867	1.20602	1.23594	1.22688	0.00211747
222712	--	6.13	1	1	261	28.7485	6.12549	1.16993	1.25981	1.25028	1.22667	0.0154473
237069	Outward-rectifier potassium channel TOK1	3.46	2	3	693	78.2321	5.40186	1.25078	1.29191	1.13707	1.22659	0.0393156
351654	Cactin	11.91	6	7	470	53.4645	7.06396	1.22452	1.19296	1.25976	1.22575	0.00722451
227008	Phosphoinositide phosphatase SAC1	31.14	18	25	700	79.0297	9.45166	1.24689	1.1825	1.24782	1.22573	0.00904866
328486	Replication factor A protein 2	25.89	8	16	282	30.3027	4.94482	1.26344	1.21067	1.20307	1.22573	0.00699804
344086	DNA repair protein rhp26	5.02	5	5	1136	126.643	7.51807	1.18016	1.2802	1.21642	1.22559	0.0163887
349161	--	1.56	2	2	1413	154.092	9.37842	1.24029	1.26125	1.17425	1.22527	0.0132749
220187	Nuclear speckle splicing regulatory protein 1 homolog	2	1	1	401	44.5706	8.36768	1.22783	1.26064	1.18723	1.22523	0.00877025
356976	--	8.59	2	2	163	17.8168	10.9165	1.20323	1.27425	1.19761	1.22503	0.0118012
221705	Transaldolase	76.07	27	181	326	35.7647	5.41455	1.21124	1.24462	1.21875	1.22487	0.00201516
108452	Transcription initiation factor TFIID subunit 12	16.11	10	13	633	66.4301	9.90576	1.21435	1.20466	1.25453	1.22451	0.00459224
328440	L-sorbose 1-dehydrogenase	6.77	2	2	561	59.7519	4.4624	1.16614	1.27087	1.23436	1.22379	0.0182957
332350	Cell wall alpha-1,3-glucan synthase ags1	3.86	7	8	2252	250.184	5.80811	1.2512	1.17687	1.23901	1.22236	0.0105437
338700	Positive regulator of purine utilization	6.51	6	6	1075	115.401	6.84424	1.14013	1.29856	1.2284	1.22236	0.0399584
28866	Ribosome association toxin RatA	13.66	2	3	183	20.4724	5.71924	1.2378	1.25451	1.17472	1.22234	0.0117284
217207	Probable serine/threonine-protein kinase fhkC	12.54	7	9	630	70.829	6.7124	1.21442	1.17304	1.27894	1.22213	0.0187027
351250	--	12.94	2	3	170	18.7693	7.40088	1.16464	1.25884	1.24208	1.22185	0.0166774
279822	FAD-linked sulfhydryl oxidase ALR	12.88	2	2	163	18.1788	8.29443	1.20239	1.29373	1.16893	1.22169	0.0271569
328984	L-serine dehydratase	1.33	2	2	1501	165.012	5.87158	1.23791	1.16796	1.25687	1.22091	0.0146476
267818	Arrestin-related trafficking adapter 10	2.02	1	1	544	58.7712	9.5249	1.20148	1.17038	1.29071	1.22086	0.0256435
14069	Uncharacterized protein C4.02c	9.65	4	4	487	53.062	9.5542	1.22835	1.21531	1.21733	1.22033	0.000338208
233397	--	3.24	1	1	216	24.0984	10.272	1.31389	1.15749	1.18925	1.22021	0.0439099
354884	--	7.71	3	5	467	51.8292	9.64209	1.23761	1.21184	1.20966	1.2197	0.00166527
280498	Nuclear protein localization protein 4	25.16	15	25	608	67.933	5.50342	1.26105	1.22441	1.17337	1.21961	0.0131392
62672	Proline-rich protein LAS17	23.79	13	14	618	63.3232	9.26123	1.2408	1.19436	1.2223	1.21915	0.00377128
251927	Annexin A7	40.32	18	30	444	48.3403	7.6499	1.25713	1.21793	1.18219	1.21908	0.00961633
334711	Ran-binding protein 10	17.47	1	19	790	87.5259	5.84619	1.11107	1.29078	1.25501	1.21895	0.0575412
273896	Chromatin modification-related protein eaf6	15.56	2	4	180	19.1877	9.65674	1.17289	1.19911	1.28402	1.21867	0.0227235
228915	Polyamine oxidase	1.43	1	1	491	54.974	4.4624	1.14827	1.2198	1.28739	1.21849	0.0321741
261493	Leucine aminopeptidase 1	10.66	4	8	347	38.6899	5.42725	1.2386	1.22834	1.18825	1.21839	0.00491094
256795	Translation machinery-associated protein 46	23.85	8	12	348	39.5874	8.90967	1.20405	1.24978	1.19989	1.21791	0.00533596
236152	RNA helicase Mov10l1	0.86	1	1	812	89.7774	7.89893	1.32113	1.15371	1.17711	1.21732	0.0534084
333471	HBS1-like protein	13.5	10	11	741	81.2176	5.96045	1.20871	1.23883	1.20247	1.21667	0.00267282
331151	DNA-directed RNA polymerase II subunit rpb7	22.02	2	2	168	18.7624	6.17627	1.24923	1.16237	1.23839	1.21667	0.0155356
223708	ADP-ribosylation factor-like protein 8B	20.44	3	4	181	20.3775	5.60498	1.23178	1.19096	1.2267	1.21648	0.0035026
253358	DNA-directed RNA polymerases I, II, and III subunit RPABC1	21.68	4	8	226	25.8554	9.11475	1.12957	1.30869	1.21061	1.21629	0.0528234
231325	Mitogen-activated protein kinase	49.86	13	33	355	41.14	7.12256	1.23262	1.23649	1.17956	1.21623	0.0071374
231545	UPF0613 protein PB24D3.06c	15.51	5	6	361	39.3117	6.07471	1.24709	1.19531	1.2054	1.21593	0.00534287
348184	--	4.42	2	2	498	52.2558	9.53955	1.21709	1.17334	1.25646	1.21563	0.0121679
244834	ATP-dependent RNA helicase DBP2	37.78	28	62	863	93.3448	9.74463	1.22618	1.19767	1.22261	1.21548	0.00172767
341909	Glucan 1,4-alpha-maltohexaosidase	17.2	1	1	93	10.462	5.38916	1.20626	1.23059	1.20957	1.21547	0.00124745
215505	ABC transporter G family member 11	1.22	2	2	1472	164.197	6.62451	1.27648	1.16249	1.2073	1.21542	0.0228788
227452	Transcription factor vib-1	9.51	6	6	610	65.3542	7.38623	1.22388	1.17894	1.24208	1.21496	0.00753117
336168	Sphingolipid C4-hydroxylase SUR2	17.44	6	7	367	41.5569	7.53271	1.29886	1.16746	1.17713	1.21448	0.03673
349008	Protein CHROMATIN REMODELING 20	1.89	3	3	1746	195.42	6.23975	1.21634	1.18863	1.23761	1.21419	0.00435377
105219	RNA polymerase II-associated protein 1 homolog	12.2	5	6	410	46.8601	5.89697	1.20988	1.22572	1.20681	1.21413	0.000747881
267338	Fimbrin	46.38	27	63	636	71.0916	5.84619	1.2301	1.17982	1.23235	1.21409	0.00635472
280866	Helicase swr-1	2.03	2	2	1378	156.29	5.16064	1.17442	1.22422	1.24332	1.21399	0.00908521
218225	Transcriptional regulatory protein rxt2	5.03	3	3	497	54.7328	5.12256	1.14402	1.23826	1.25769	1.21332	0.0260248
322826	Peptidyl-prolyl cis-trans isomerase-like 1	29.66	3	5	118	12.4484	5.93506	1.26345	1.19707	1.17867	1.21306	0.0142908
339621	Histone deacetylase clr3	7.15	5	5	671	75.8787	6.15088	1.25759	1.17113	1.21036	1.21303	0.0134884
326186	--	2.96	4	5	1554	168.461	4.57666	1.12182	1.24496	1.27204	1.21294	0.0440343
264271	6,7-dimethyl-8-ribityllumazine synthase	70.1	11	40	194	20.2134	6.27783	1.20886	1.23607	1.19215	1.21236	0.00361338
108037	Upstream activation factor subunit spp27	23.88	6	7	268	30.1762	6.66846	1.21779	1.20737	1.21136	1.21217	0.000204453
239187	Protein SGT1	49.35	18	39	464	50.7074	7.53271	1.22984	1.20838	1.1973	1.21184	0.00202637
279759	Phosphatidylinositol 4,5-bisphosphate-binding protein SLM1	21.1	9	10	507	56.9819	8.47021	1.20186	1.20667	1.22646	1.21166	0.00126247
216399	DNA topoisomerase 1	10.87	10	12	846	96.9209	9.26123	1.23649	1.16401	1.23448	1.21166	0.0124433
249817	Uncharacterized CDP-alcohol phosphatidyltransferase class-I family protein C22A12.08c	67.86	24	71	476	52.6762	6.12549	1.22544	1.20538	1.20408	1.21164	0.00106541
355246	Hydroxyacyl-thioester dehydratase type 2, mitochondrial	5.82	1	1	189	20.9187	6.80029	0.965807	1.3573	1.31076	1.21129	0.229173
216412	Sulfate permease 2	1.47	1	1	817	89.8357	8.06006	1.32857	1.11344	1.19178	1.21126	0.0782865
261988	Uncharacterized lactate 2-monooxygenase PB1A11.03	9.86	4	4	416	45.2728	5.99854	1.19499	1.11042	1.32695	1.21079	0.0789074
225628	Probable phospholipid-transporting ATPase NEO1	7.92	8	9	1288	142.287	6.58057	1.21693	1.14727	1.26789	1.2107	0.0264458
325357	--	6.34	2	2	410	43.9161	8.80713	1.19623	1.24783	1.18709	1.21038	0.00797938
263113	26S proteasome regulatory subunit RPN10	39.73	8	17	292	31.0896	5.04639	1.18	1.29293	1.15773	1.21022	0.037424
347924	Ubiquitin fusion degradation protein 1 homolog	2	2	2	750	82.6109	5.97314	1.28908	1.15711	1.18444	1.21021	0.0347093
225439	Uncharacterized protein YGR266W	5.53	7	8	1572	173.765	7.18115	1.1682	1.27522	1.18708	1.21016	0.0237535
245971	E3 ubiquitin-protein ligase bre1	18.52	12	16	702	79.6972	6.48096	1.30312	1.32375	1.00297	1.20995	0.180098
98941	Nibrin	6.98	5	5	788	88.1172	7.44482	1.20929	1.21148	1.20878	1.20985	1.56e-05
240287	Autophagy protein 5	7.48	2	2	254	28.0057	7.10791	1.21225	1.20067	1.21621	1.20971	0.000493695
331209	LIM domain-containing protein C4F6.12	3.73	2	2	751	81.9654	8.48486	1.20836	1.23108	1.18657	1.20867	0.00376982
50137	Uncharacterized protein C18H10.07	6.38	1	1	298	32.2062	5.8208	1.08108	1.18329	1.36096	1.20844	0.125548
264312	Aminopeptidase 2, mitochondrial	66.29	52	187	881	98.0223	5.51611	1.2371	1.19984	1.18727	1.20807	0.00513211
226653	--	6.6	4	4	788	92.6064	5.85889	1.05583	1.31109	1.25455	1.20716	0.115848
336002	Vacuolar protein sorting-associated protein 45	21.18	9	10	576	64.1183	6.0874	1.23403	1.17655	1.21074	1.20711	0.00643311
270739	Autophagy-related protein 17	1.72	1	1	407	45.5596	4.75439	1.30838	1.1814	1.13148	1.20708	0.058997
261347	Aminopeptidase Y	32.85	14	21	484	52.2305	4.83057	1.18938	1.20339	1.228	1.20692	0.00296207
328420	Uncharacterized transcriptional regulatory protein C1327.01c	11.77	7	16	688	75.1887	7.28369	1.22797	1.14616	1.2446	1.20624	0.0210756
236163	Uncharacterized PH domain-containing protein YPR091C	1.22	1	1	898	97.8294	8.66064	1.12706	1.19577	1.29537	1.20607	0.0518793
237369	ABC transporter ATP-binding protein ARB1	56.1	27	83	631	70.0741	7.1665	1.21155	1.20985	1.19569	1.2057	0.000596595
258229	Pre-mRNA-processing factor 31	12.58	6	8	604	64.6179	5.80811	1.21527	1.19621	1.20476	1.20541	0.000719042
343487	Glucan endo-1,3-beta-glucosidase	5.25	1	1	381	40.9601	5.0083	1.23071	1.28498	1.10016	1.20529	0.0645459
326125	--	18.81	7	7	436	48.1053	9.64209	1.16228	1.21884	1.23376	1.20496	0.0110951
345848	--	10.14	3	3	345	36.348	9.62744	1.1358	1.26507	1.2139	1.20492	0.0320302
349836	V-type proton ATPase 16 kDa proteolipid subunit 2	11.25	1	1	160	16.4616	8.45557	1.18516	1.17629	1.25293	1.20479	0.0136809
356378	Probable small nuclear ribonucleoprotein F	22	1	1	100	11.4559	9.99365	0.855606	1.70893	1.04967	1.20474	0.511009
75324	--	4.52	6	6	1949	208.981	7.23975	1.1842	1.25206	1.17781	1.20469	0.0132033
343524	Iterative polyketide synthase CazM	7.14	1	1	252	28.4254	8.67529	1.12229	1.28396	1.20762	1.20462	0.0483292
238438	Kinesin-like protein KIF1A	3.5	2	2	543	61.5585	5.64307	1.25275	1.15753	1.20187	1.20405	0.0176958
352107	Probable serine-O-acetyltransferase cys2	29.36	11	11	453	49.6554	5.77002	1.22498	1.19697	1.18982	1.20392	0.00275642
237546	Dual specificity protein kinase lkh1	1.2	1	1	584	65.8625	9.5542	1.17204	1.19726	1.24221	1.20384	0.00998409
231083	Set1 complex component spp1	7.08	2	2	353	40.0442	5.07178	1.16971	1.27137	1.16929	1.20346	0.0267423
103595	Multiprotein-bridging factor 1	56.49	11	24	154	16.607	9.92041	1.24987	1.29771	1.06249	1.20335	0.10527
271788	Serine/threonine-protein kinase hal4	9.95	4	4	432	48.2242	8.14795	1.26917	1.1636	1.17679	1.20319	0.0256926
251901	Lon protease homolog, mitochondrial	38.05	38	70	1109	121.199	5.80811	1.21921	1.20173	1.18779	1.20291	0.00200042
355377	--	17.46	1	3	126	13.5829	9.70068	1.03363	1.35988	1.21506	1.20286	0.164609
325632	Probable NADH pyrophosphatase	11.38	4	4	413	45.0528	5.97314	1.14909	1.27444	1.18391	1.20248	0.0323974
87037	Poly(A) polymerase pla1	13.14	7	8	609	68.3502	7.53271	1.25489	1.13221	1.21916	1.20209	0.0309934
325456	NADH dehydrogenase	1.8	1	1	445	48.0854	6.40479	1.17261	1.24059	1.19294	1.20205	0.00979724
224376	--	29.92	3	6	127	13.978	4.81787	1.09239	1.2986	1.21398	1.20166	0.0779172
348951	Enolase-phosphatase E1	37.44	6	10	211	23.5539	6.21436	1.227	1.16473	1.2123	1.20134	0.00859977
228548	Fumonisin B1 esterase	7	3	8	543	60.3366	4.55127	1.1112	1.24964	1.24274	1.20119	0.0466411
277906	Uncharacterized Sel1-like repeat-containing protein C1B3.10c	11.59	8	13	828	92.2801	5.71924	1.2196	1.16105	1.22185	1.20084	0.0096799
329911	RNA-binding protein rsd1	26.56	12	15	561	62.6681	8.07471	1.19668	1.22103	1.18468	1.2008	0.00282275
103819	Esterase LovG	20.12	3	4	164	18.3994	6.55127	1.16064	1.24406	1.19602	1.20024	0.0142611
68119	Tetracenomycin polyketide synthesis O-methyltransferase TcmP	33.33	1	9	309	35.7147	6.68311	1.00746	1.24654	1.34527	1.19976	0.184602
242495	--	9.47	1	2	169	18.418	4.70361	1.11803	1.31197	1.1687	1.19957	0.0752479
246993	Uncharacterized protein HI_1014	14.89	3	3	309	34.3047	6.65381	1.23239	1.18564	1.18046	1.1995	0.00678238
266868	Rhamnolipids biosynthesis 3-oxoacyl-[acyl-carrier-protein] reductase	34.44	9	14	270	28.1544	6.53662	1.19556	1.17214	1.22993	1.19921	0.00702202
330635	--	1.15	3	6	3475	374.523	4.83057	1.21737	1.1597	1.21998	1.19901	0.00963008
352345	Beta-1,2-xylosyltransferase 1	13.62	8	8	683	77.3582	6.0874	1.2077	1.20659	1.18237	1.19889	0.00172257
269408	Pre-mRNA-splicing factor CWC2	30.79	11	14	367	41.3157	6.7417	1.22706	1.16203	1.20585	1.19831	0.00919443
221806	--	6.38	2	2	345	39.5372	8.93896	1.14529	1.27774	1.17174	1.19825	0.0392325
224200	Ubiquitin-conjugating enzyme 15	17.42	2	3	155	17.669	5.89697	1.16591	1.27116	1.15615	1.19774	0.0329664
331176	--	16.48	9	12	625	69.7667	7.23975	1.21192	1.21462	1.16646	1.19767	0.00618692
216715	Chitin synthase regulatory factor 3	5.26	3	4	780	84.8241	9.01221	1.14838	1.28251	1.16201	1.19763	0.0434981
349255	Probable acid phosphatase SPBC4.06	42.99	17	29	521	58.0123	7.89893	1.20596	1.18574	1.20056	1.19742	0.000936912
216597	Uncharacterized protein YML020W	1.09	1	1	640	69.6573	6.81494	1.26673	1.21543	1.10966	1.19727	0.0508
238334	Uncharacterized membrane protein C776.05	4.82	2	3	498	56.9383	9.27588	1.27313	1.12971	1.18869	1.19718	0.0417766
352782	PX domain-containing protein C1450.12	14.39	12	13	945	107.458	5.89697	1.25169	1.1766	1.16284	1.19705	0.019074
264433	--	35	4	6	120	13.4822	9.68604	1.14828	1.22838	1.21428	1.19698	0.0153472
328113	--	19.32	2	2	176	18.7416	6.26514	1.19562	1.15886	1.23578	1.19676	0.0125059
331279	Cysteine--tRNA ligase	43.35	1	52	782	88.3731	6.15088	1.26894	1.17287	1.14804	1.19662	0.0334031
256638	Putative band 7 family protein R614	39	12	19	341	37.068	7.32764	1.2265	1.15959	1.203	1.19636	0.00981543
271198	ATP-dependent RNA helicase DBP8	4.87	2	2	411	45.6235	9.53955	1.15	1.19981	1.23911	1.19631	0.0168181
273126	Phosphatidylinositol 3-kinase catalytic subunit type 3	5.75	4	4	730	82.975	6.94678	1.21145	1.19668	1.17965	1.19593	0.00219201
283292	Probable cation-transporting ATPase C1672.11c	5.28	6	7	1270	141.712	5.64307	1.28065	1.15144	1.15483	1.19564	0.0441238
342224	--	2.83	1	4	637	71.924	5.50342	1.24902	1.1068	1.22888	1.1949	0.0482397
358217	Uncharacterized protein M6_Spy0233	26.06	3	3	188	19.8992	9.12939	1.20957	1.13942	1.23368	1.19422	0.0205404
344211	--	11.86	5	5	413	41.486	10.272	1.16886	1.21425	1.19834	1.19382	0.0046729
216252	DNA replication licensing factor mcm3	23.75	17	20	842	93.3903	6.85889	1.21872	1.18547	1.17654	1.19358	0.00436608
248091	--	25.13	2	7	374	41.8944	5.43994	1.14785	1.28527	1.14708	1.1934	0.0520436
221680	--	3.42	1	1	322	35.5164	7.6792	1.13906	1.24785	1.19254	1.19315	0.0254321
216231	Spindle pole body component alp14	5.47	4	4	877	94.8523	8.48486	1.21933	1.22668	1.13325	1.19309	0.0232913
274467	Protein bir1	1.05	1	1	666	72.2734	8.33838	1.21935	1.20279	1.15671	1.19295	0.00930136
227458	Serine/threonine-protein kinase gad8	32.48	15	29	625	69.0042	7.31299	1.20287	1.20775	1.16821	1.19294	0.0041368
261108	Sorbose reductase sou1	28.62	7	9	269	28.1663	5.43994	1.21666	1.13971	1.22239	1.19292	0.0185616
332950	Threonylcarbamoyl-AMP synthase	9.73	3	3	411	43.6418	5.33838	1.19719	1.16717	1.21416	1.19284	0.00503679
218012	Cytosolic Fe-S cluster assembly factor NAR1	3.69	1	2	542	57.7511	5.79541	1.12657	1.24166	1.2097	1.19264	0.0302694
328207	--	1.86	1	1	752	83.5453	9.62744	1.04909	1.28884	1.23811	1.19201	0.119093
89706	Serine/threonine-protein kinase prp4	1.87	1	1	482	54.1623	6.44287	1.23253	1.11475	1.22865	1.19198	0.038187
351730	ATPase family AAA domain-containing protein 3B	18.45	15	20	840	94.3605	6.43018	1.22341	1.16743	1.18457	1.1918	0.00737334
242339	UPF0311 protein Rpal_1987	3.92	1	1	153	17.1617	7.29834	1.25756	1.13953	1.17827	1.19179	0.0312751
240428	--	4.46	1	1	314	34.6736	10.1841	1.12387	1.24828	1.20233	1.1915	0.0341432
264402	Mediator of RNA polymerase II transcription subunit 14	2.8	3	3	1000	112.855	9.0415	1.25566	1.15021	1.16834	1.19141	0.0277226
351973	mRNA export factor MEX67	9.16	6	10	677	74.3981	9.40771	1.27134	1.11262	1.18937	1.19111	0.0529741
259209	Cysteine proteinase 1, mitochondrial	40.22	1	38	455	50.4598	5.69385	1.18079	1.19166	1.19963	1.19069	0.000819196
28596	t-SNARE affecting a late Golgi compartment protein 1	6.12	1	1	245	26.658	4.64014	1.17376	1.27411	1.12392	1.1906	0.0497237
326196	Uncharacterized rhomboid protein AN10929	6.75	3	3	400	44.3744	7.66455	1.23926	1.11077	1.21958	1.18987	0.0415468
341103	Uncharacterized protein C14C4.04	7.42	2	2	256	27.8053	7.15186	1.20116	1.17624	1.19127	1.18956	0.00145715
333070	Proteasome component ECM29	13.72	33	41	2610	286.811	5.47803	1.19498	1.18824	1.18525	1.18949	0.000230685
354065	WW domain-containing protein C2F3.14c	10	1	1	100	11.5608	9.77393	1.16824	1.19333	1.20685	1.18947	0.0035451
282673	General negative regulator of transcription subunit 3	26.66	16	21	634	69.4567	5.36377	1.18553	1.2249	1.15754	1.18932	0.0104807
331281	Mediator of RNA polymerase II transcription subunit 16	0.8	1	1	876	97.6318	7.34229	1.16274	1.08844	1.31592	1.18903	0.105938
226141	Transcription elongation factor spt5	32.74	28	39	959	102.62	6.62451	1.22005	1.13274	1.21368	1.18882	0.0214408
286252	Ras-related GTP-binding protein A	13.11	4	5	389	42.5618	8.73389	1.19618	1.21305	1.1571	1.18877	0.00761719
223327	GTP-binding nuclear protein GSP1/Ran	54.17	11	38	216	24.4444	6.55127	1.1966	1.20556	1.16282	1.18833	0.00473913
251130	Transcription initiation factor IIF subunit beta	27.25	9	13	356	40.7693	5.2749	1.18965	1.26262	1.11239	1.18822	0.0492155
226768	Double-strand break repair protein mus-23	15.35	10	13	736	83.0178	5.5415	1.22528	1.16044	1.1789	1.18821	0.0103409
227427	Uncharacterized transcriptional regulatory protein C56F2.05c	1.79	1	1	615	65.2012	9.46631	1.13179	1.25055	1.1821	1.18815	0.031871
332148	Ubiquitin-conjugating enzyme E2-16 kDa	30.22	4	7	139	15.6238	6.52197	1.11473	1.26245	1.18725	1.18814	0.0477287
11328	FKBP12-associated protein 1 homolog	3.31	3	3	724	81.3561	7.45947	1.27694	1.09559	1.19034	1.18762	0.0698431
258388	Serine/threonine-protein kinase KIN4	15.31	8	18	1006	109.925	9.78857	1.16201	1.13271	1.26805	1.18759	0.0448207
239092	tRNA (guanine(37)-N1)-methyltransferase	16.42	7	9	469	51.6517	6.93213	1.216	1.1297	1.21544	1.18705	0.0227032
219233	Sorting nexin-4	26.22	10	12	473	53.1296	5.78271	1.19006	1.19758	1.17347	1.18704	0.00144681
81424	Rho GTPase-activating protein gacHH	5.54	2	2	325	35.857	7.84033	1.20234	1.15995	1.19799	1.18676	0.00515785
223647	Probable peptide chain release factor C12orf65, mitochondrial	6.61	1	1	121	13.3913	10.228	1.244	1.12561	1.19044	1.18668	0.0320126
269602	Putative DNA helicase INO80	14.63	22	28	1682	190.345	9.27588	1.18679	1.20192	1.17133	1.18668	0.00223077
352503	AMME syndrome candidate gene 1 protein	38.71	9	10	310	34.2302	4.90674	1.20984	1.2625	1.0864	1.18625	0.0703311
349298	Vacuolar membrane protein pep3	14.65	11	13	874	97.5534	5.64307	1.19994	1.17197	1.18645	1.18612	0.00187832
271420	DnaJ protein homolog xdj1	44.47	18	46	425	46.6588	5.05908	1.2177	1.17413	1.16543	1.18575	0.00749147
326623	Vacuolar protein sorting-associated protein 1	51.22	31	78	699	77.2563	8.41162	1.18958	1.18935	1.17828	1.18574	0.000402687
221972	--	8.47	2	2	307	31.1047	8.48486	1.21662	1.1639	1.17664	1.18572	0.00723543
333616	Uncharacterized ATP-dependent helicase C582.10c	6.57	4	8	928	103.917	6.84424	1.18258	1.17837	1.1957	1.18555	0.000790565
256125	DNA-directed RNA polymerase II subunit RPB3	34.89	9	11	321	35.2402	4.80518	1.22509	1.19333	1.13823	1.18555	0.0181901
259052	Diphthamide biosynthesis protein 2	3.95	2	2	532	58.4284	4.79248	1.12596	1.20348	1.22707	1.1855	0.0260528
333862	Acetyl-hydrolase	5.85	2	2	410	44.3278	7.92822	1.14739	1.16024	1.2488	1.18548	0.0282933
344172	Uncharacterized MFS-type transporter C530.15c	3.64	2	2	604	65.3498	5.36377	1.26937	1.15752	1.12932	1.1854	0.0493023
222611	--	14.58	2	2	240	25.7776	5.14795	1.15813	1.22358	1.17445	1.18538	0.0110703
235380	--	9.72	13	20	1687	183.267	5.8335	1.16968	1.19141	1.19502	1.18537	0.00181717
327919	Transcription initiation factor IIB	18.46	6	6	325	35.7672	7.60596	1.18318	1.1433	1.22897	1.18515	0.017407
331773	Dol-P-Man:Man(5)GlcNAc(2)-PP-Dol alpha-1,3-mannosyltransferase	15.14	3	4	284	29.9878	7.50342	1.1843	1.17363	1.1974	1.18511	0.0013755
342283	Mitochondrial Rho GTPase 1	9.29	4	4	624	69.6794	6.04932	1.24723	1.18611	1.12004	1.18446	0.0374317
239811	Zinc finger CCCH domain-containing protein C337.12	6.31	2	2	412	44.9219	8.54346	1.19974	1.21727	1.13539	1.18414	0.0177915
277989	Putative ER lumen protein-retaining receptor C28H8.4	6.79	2	3	280	31.2324	4.75439	1.14352	1.14784	1.26036	1.18391	0.0406322
333764	Nicotinamide/nicotinic acid mononucleotide adenylyltransferase 1	12.5	3	3	240	27.1479	6.60986	1.25494	1.1629	1.13323	1.18369	0.0375604
346243	Uncharacterized transporter C3B8.04c	5.2	8	13	2020	222.202	6.55127	1.21077	1.11553	1.22336	1.18322	0.0328232
49311	Uncharacterized UPF0442 protein C7D4.12c	4.2	1	1	405	43.3675	6.31592	1.23318	1.11783	1.1981	1.18304	0.0330722
267823	Regulator of cytoskeleton and endocytosis RVS167	38.73	17	20	457	51.3611	7.31299	1.17108	1.21372	1.16404	1.18295	0.00712017
325359	Leptomycin B resistance protein pmd1	12.9	15	20	1380	150.102	5.35107	1.21748	1.16493	1.16529	1.18257	0.00902007
219647	--	14.16	5	6	473	51.3392	5.42725	1.11683	1.19196	1.23824	1.18234	0.0356433
351959	--	0.96	1	1	937	100.533	9.77393	1.13949	1.1226	1.28437	1.18215	0.0710779
218358	Imidazole glycerol phosphate synthase hisHF	19.78	7	8	546	58.2696	5.77002	1.20937	1.17561	1.16103	1.182	0.00612937
327910	probable cardiolipin-specific deacylase, mitochondrial	18.88	6	7	445	49.6775	9.0708	1.16519	1.19582	1.18455	1.18185	0.00240993
342258	Calcium-transporting ATPase 2	3.77	5	5	1326	144.319	6.68311	1.16114	1.25085	1.13315	1.18171	0.036114
334181	Hydrolase C26A3.11	36.96	10	17	303	33.3321	6.53662	1.23029	1.12692	1.18762	1.18161	0.0262052
231622	Sexual differentiation process protein isp7	6.06	2	2	264	29.0869	6.80029	1.21039	1.16005	1.17431	1.18158	0.00673753
240947	Golgi to ER traffic protein 4	42.12	12	21	330	35.9644	5.89697	1.1378	1.19135	1.2148	1.18132	0.0154325
262700	Putative ubiquitin thioesterase otu1	19.03	6	7	310	34.9717	5.59229	1.14784	1.14997	1.24517	1.18099	0.0300286
277844	ABC transporter G family member ARB_01379	7.12	7	9	1040	113.996	5.46533	1.26625	1.09733	1.17797	1.18052	0.0658836
233669	26S proteasome non-ATPase regulatory subunit 9	8.58	2	3	233	25.0585	5.85889	1.13423	1.27757	1.12875	1.18018	0.0659527
273363	L-aminoadipate-semialdehyde dehydrogenase-phosphopantetheinyl transferase	6.02	2	2	266	29.2996	5.50342	1.16851	1.17949	1.19247	1.18016	0.00147463
333688	--	4.47	4	4	760	81.8458	6.62451	1.22442	1.09983	1.21528	1.17984	0.0462798
220698	Uracil-DNA glycosylase	12.58	4	5	310	34.2888	9.90576	1.26752	1.09244	1.1783	1.17942	0.0710138
338297	--	1.9	1	1	526	54.307	8.38232	1.0866	1.1812	1.27015	1.17932	0.0773492
105065	--	12.36	3	4	267	28.0316	4.85596	1.17698	1.1852	1.17566	1.17928	0.000276921
227393	Uncharacterized RING finger protein P8B7.23	9.03	6	7	631	70.6121	7.35693	1.20653	1.178	1.15136	1.17863	0.00786005
246153	Chromosome segregation protein sudA	27.16	27	34	1204	137.709	6.55127	1.18874	1.15721	1.18986	1.1786	0.00357143
66145	--	2.71	1	1	258	28.1879	9.27588	1.02562	1.06901	1.44104	1.17856	0.308344
331210	Ubiquitin-like protein pmt3/smt3	41.58	4	8	101	11.3435	4.90674	1.16474	1.19553	1.17535	1.17854	0.00254964
350953	Histone chaperone rtt-106	12.55	6	7	502	55.0318	4.55127	1.15866	1.18021	1.19633	1.1784	0.00372143
329515	Retrovirus-related Pol polyprotein from transposon TNT 1-94	2.3	2	3	1086	119.914	7.62061	1.18637	1.16312	1.18544	1.17831	0.00181168
325338	--	1.15	1	1	1135	120.889	9.87646	0.945422	1.09849	1.4909	1.17827	0.386925
226142	Regulator of nonsense transcripts 1 homolog	19.2	19	21	1094	119.716	6.62451	1.20987	1.13656	1.18747	1.17797	0.0145292
238525	Neuronal-specific septin-3	31.27	14	16	502	56.6067	6.50732	1.17079	1.18739	1.17518	1.17779	0.00077924
276102	Enoyl-CoA-hydratase	6.12	1	1	196	20.9198	9.01221	1.22221	1.16648	1.14433	1.17767	0.0165809
224173	DNA-directed RNA polymerases I, II, and III subunit RPABC2	24.81	3	4	129	14.7364	4.55127	1.13114	1.26396	1.1367	1.17727	0.0549838
333615	Class E vacuolar protein-sorting machinery protein HSE1	20.47	11	18	596	65.2684	6.43018	1.19285	1.21219	1.12671	1.17725	0.0206566
222463	U3 small nucleolar RNA-associated protein 11	3.35	1	1	269	30.855	9.5542	1.27133	1.11729	1.14279	1.17714	0.0653926
221434	ATPase get3	40.12	10	18	344	37.4219	4.89404	1.22489	1.14343	1.16297	1.1771	0.0186838
350788	Actin-like protein arp5	22.57	16	20	762	86.3477	5.32568	1.17141	1.18369	1.17551	1.17687	0.000416189
216308	Protein fluG	2.18	2	3	870	97.0136	5.43994	1.10403	1.19125	1.2352	1.17683	0.0443767
223060	Mitochondrial import inner membrane translocase subunit tim23	12.66	2	2	229	24.0011	8.44092	1.12943	1.1911	1.2096	1.17671	0.0182957
263713	Rho-type GTPase-activating protein 1	2.83	3	3	1023	114.806	6.7124	1.19645	1.13953	1.19376	1.17658	0.0108441
242016	Uncharacterized J domain-containing protein C63.13	26.25	5	14	240	25.8817	6.06201	1.15952	1.23723	1.13293	1.17656	0.0299994
349826	--	3.03	1	1	462	50.0566	8.89502	1.16425	1.24027	1.12504	1.17652	0.0348134
230926	Short-chain dehydrogenase/reductase 3	2.78	1	1	360	39.8877	9.0415	1.20957	1.14793	1.17165	1.17638	0.010201
106261	--	45.71	20	39	466	49.4076	5.24951	1.17958	1.18068	1.16805	1.1761	0.000525567
242067	Putative DNA glycosylase At3g47830	9.23	1	2	260	28.7276	8.63135	1.12856	1.14465	1.2549	1.17604	0.0472931
256056	--	9.49	6	8	622	68.1766	4.99561	1.18805	1.16321	1.17679	1.17602	0.00166113
279163	--	7.11	1	6	619	69.482	8.6167	1.23443	1.11852	1.17463	1.17586	0.0343595
235928	--	9.75	7	9	1046	114.045	7.25439	1.22835	1.11349	1.18532	1.17572	0.0344837
248091	--	19.67	1	6	361	40.4798	5.79541	1.21609	1.11528	1.19555	1.17564	0.0293189
235902	Tyrosine-protein phosphatase 1	8.2	7	8	1036	112.603	8.6167	1.21536	1.15569	1.15573	1.17559	0.0125795
63953	--	11.98	2	4	334	34.1919	6.52197	1.10122	1.21986	1.20549	1.17552	0.0424887
220264	--	12.14	3	3	412	45.2499	4.65283	1.20997	1.17774	1.13798	1.17523	0.0138251
259954	Rho1 guanine nucleotide exchange factor 3	8.63	11	14	1669	183.328	6.7417	1.18782	1.1585	1.17884	1.17505	0.00244503
233368	Protein-lysine N-methyltransferase EFM4	18.6	4	6	258	28.4127	4.67822	1.17204	1.18074	1.17158	1.17478	0.000290501
347749	--	2.7	1	1	222	23.102	9.34912	1.10596	1.26127	1.15704	1.17475	0.0620889
107644	--	8.75	5	5	514	56.1948	9.5249	1.18644	1.17531	1.16227	1.17468	0.00159524
328161	GTP-binding protein rho2	49.2	6	17	187	20.5966	5.19873	1.12196	1.18602	1.21471	1.17423	0.0238741
282786	Uncharacterized MFS-type transporter C530.15c	6.05	3	6	479	52.4773	8.25049	1.20548	1.12211	1.19503	1.1742	0.0219182
51892	Probable RNA-dependent RNA polymerase 2	4.26	4	4	940	106.687	6.94678	1.21004	1.16676	1.14581	1.1742	0.0115788
330244	--	21.01	10	11	652	66.6145	9.81787	1.1423	1.1956	1.18438	1.17409	0.00857452
327019	Chromosome segregation in meiosis protein 3	6.87	1	3	335	35.5321	4.56396	0.955143	1.42396	1.14212	1.17374	0.330365
288114	Pre-mRNA-splicing factor ATP-dependent RNA helicase prp22	7.69	8	9	1197	134.525	7.21045	1.18954	1.14388	1.18746	1.17363	0.00726821
274887	Regulator of phospholipase D SRF1	2.94	1	1	238	26.8479	8.68994	1.27972	1.14012	1.10058	1.17347	0.0856865
265679	--	1.82	1	1	713	76.5348	7.56201	1.06923	1.24956	1.20094	1.17324	0.0845897
221073	Protein FAM50A	18.35	5	6	387	43.3472	9.12939	1.17446	1.18334	1.16149	1.1731	0.00134092
219456	DNA-(apurinic or apyrimidinic site) lyase 1	13.39	6	7	463	49.9785	8.83643	1.14406	1.1934	1.1818	1.17309	0.0073258
232590	NAD/NADP-dependent indole-3-acetaldehyde reductase	43.05	9	15	295	32.2085	5.26221	1.19231	1.15583	1.17099	1.17305	0.00371745
107731	Probable inorganic phosphate transporter 1-6	17.96	11	16	657	74.0032	6.94678	1.23683	1.12753	1.15425	1.17287	0.0343613
352142	--	1.64	1	3	853	98.3806	7.2251	0.921897	1.43327	1.16341	1.17286	0.362437
333916	Putative general negative regulator of transcription C16C9.04c	17.2	1	15	715	77.8981	6.55127	1.19027	1.17007	1.15804	1.17279	0.00294892
333694	--	19.83	2	5	121	13.0211	6.53662	1.15234	1.16983	1.19587	1.17268	0.00531974
325892	Condensin complex subunit 3	19.33	16	25	957	107.023	4.97021	1.17363	1.17461	1.16962	1.17262	7.81e-05
353825	Protein transport protein SEC23	22.85	19	61	2004	226.598	5.80811	1.14925	1.19339	1.17368	1.17211	0.0054578
339600	Transcriptional regulatory protein PHO23	5.28	4	4	701	74.1095	9.59814	1.13997	1.15156	1.22471	1.17208	0.0229481
223085	3,4-dihydroxy-2-butanone 4-phosphate synthase	29	5	8	231	25.0015	5.35107	1.16848	1.19258	1.15513	1.17206	0.00403234
99898	Niemann-Pick type C-related protein 1	8.69	10	10	1278	140.909	5.32568	1.23907	1.11147	1.16558	1.17204	0.043219
235850	Low affinity vacuolar monovalent cation/H(+) antiporter	9	9	16	1156	126.685	6.12549	1.19737	1.13628	1.18185	1.17183	0.0111927
224111	--	28.08	3	6	146	15.9522	5.77002	1.13173	1.21495	1.1673	1.17133	0.0192295
221181	Protein NipSnap homolog 1	52.71	5	32	332	38.1766	9.34912	1.28493	1.12188	1.1059	1.1709	0.0961409
245921	CCR4-NOT transcription complex subunit 8	9.94	4	8	493	53.7854	7.10791	1.18766	1.14679	1.17741	1.17062	0.00513611
238410	NADH dehydrogenase	1.79	1	1	502	58.6273	6.3667	1.09711	1.29112	1.1236	1.17061	0.106817
328806	Ubiquitin-activating enzyme E1 1	56.8	40	113	1030	113.711	5.09717	1.18863	1.16139	1.1618	1.17061	0.00277972
239517	Histone acetyltransferase type B subunit 2	31.68	9	13	423	47.4054	4.97021	1.17124	1.1783	1.16216	1.17057	0.000748898
329483	Metacaspase-1A	36.02	10	19	397	43.7242	6.99072	1.18966	1.19176	1.13013	1.17052	0.0137462
241547	Bifunctional epoxide hydrolase 2	3.89	1	1	283	32.0599	5.10986	1.22764	1.22153	1.06184	1.17033	0.0882962
338698	COBW domain-containing protein 1	13.74	8	16	961	103.553	5.59229	1.16955	1.15383	1.18756	1.17031	0.00325717
349367	UBA domain-containing protein 7	14.24	11	17	927	99.3785	9.02686	1.17302	1.17184	1.16536	1.17007	0.000196158
349199	Chromatin modification-related protein EAF1	2.21	3	4	1539	170.049	7.38623	1.13672	1.14626	1.22716	1.17005	0.0273024
357567	--	6.62	1	1	151	16.4092	6.30322	1.19601	1.0085	1.3053	1.16994	0.188935
257412	Gamma-glutamylputrescine oxidoreductase	21.97	11	15	528	57.1329	5.96045	1.13806	1.18771	1.18377	1.16985	0.00868716
273593	S-(hydroxymethyl)glutathione dehydrogenase	45.65	12	52	379	40.1621	7.03467	1.20542	1.17158	1.13219	1.16973	0.0151874
236908	Uncharacterized pyrophosphatase/phosphodiesterase C725.05c	1.19	1	1	675	76.1694	6.06201	1.11526	1.17798	1.21483	1.16936	0.0282096
106724	Serine/threonine-protein kinase oca2	11.34	9	13	785	86.5265	9.23193	1.17659	1.15941	1.17197	1.16932	0.000918024
231804	Increased recombination centers protein 6	10.36	3	3	338	36.4526	4.36084	1.14063	1.23561	1.13171	1.16932	0.0364601
255221	Zinc finger protein ZPR1	41.41	16	28	483	53.3067	4.58936	1.17733	1.18892	1.1416	1.16928	0.00700265
242533	Proteasome subunit beta type-1	61.93	10	21	197	21.3605	6.87354	1.15523	1.21237	1.13952	1.16904	0.0167137
233124	--	8.68	2	2	242	27.2789	9.17334	1.15757	1.12567	1.22382	1.16902	0.0280209
332785	--	3.97	2	2	831	93.3531	8.95361	1.21563	1.19382	1.09717	1.16887	0.0434583
356103	Protein SOF1	14.37	3	3	160	19.1971	10.3745	1.14838	1.15343	1.20441	1.16874	0.011061
344083	Iron-sulfur assembly protein 2	8.87	2	2	248	26.6974	5.69385	1.17605	1.17447	1.15522	1.16858	0.0015727
221207	--	3.85	1	1	260	29.9417	6.01123	1.15829	1.15741	1.18971	1.16847	0.00395232
271882	Uncharacterized FAD-binding protein C12C2.03c	1.31	1	1	613	68.1104	5.2749	1.20725	1.16251	1.13537	1.16838	0.0151384
105206	--	10.78	6	7	844	91.048	6.771	1.1727	1.15988	1.17198	1.16819	0.000610745
331279	Cysteine--tRNA ligase	41.03	1	53	819	92.1188	6.02393	1.2155	1.16652	1.12216	1.16806	0.02477
320421	--	4.29	1	1	140	15.9793	9.87646	1.16801	1.14488	1.1906	1.16783	0.00612779
283466	Cyclin CCL1	15.27	4	4	334	37.057	8.68994	1.08832	1.16367	1.25092	1.16764	0.0703518
258943	Kinesin-like protein 5	2.93	3	5	990	107.684	9.71533	1.33687	1.13759	1.0284	1.16762	0.204566
323021	U3 small nucleolar RNA-associated protein 6	8.82	2	2	204	23.7614	10.0669	0.895276	0.721304	1.8858	1.16746	0.689618
224015	Mitochondrial import receptor subunit tom22	30.41	4	7	148	16.561	4.32275	1.19074	1.1189	1.19174	1.16713	0.0201927
281591	PAB-dependent poly(A)-specific ribonuclease subunit PAN2	4.23	5	5	1134	125.986	7.53271	1.22718	1.13111	1.14308	1.16712	0.0311902
269623	CRAL-TRIO domain-containing protein C23B6.04c	42.46	13	20	358	40.3645	5.71924	1.20899	1.13422	1.15786	1.16702	0.0170063
221181	Protein NipSnap homolog 1	54.59	1	26	218	24.7247	9.27588	1.14196	1.11505	1.24336	1.16679	0.0507178
223818	--	9.47	1	3	190	20.7867	8.38232	1.14544	1.1567	1.19768	1.1666	0.00895459
246346	Probable Na(+)/H(+) antiporter C3A11.09	1.17	1	1	938	103.981	6.72705	1.10711	1.14603	1.24514	1.16609	0.0560988
325185	Putative antiporter CaxA	2.74	1	1	401	42.14	6.56592	1.14571	1.18012	1.17235	1.16606	0.00391231
351358	--	3.32	3	4	1146	123.871	9.84717	1.18671	1.14711	1.16367	1.16583	0.00476022
347207	Uncharacterized RNA-binding protein C3H8.09c	5.36	5	8	821	89.1673	5.03369	1.20343	1.15507	1.13897	1.16582	0.0133704
253332	NAD-dependent protein deacylase	9.76	3	6	287	30.9229	6.22705	1.19907	1.17569	1.12253	1.16576	0.0181563
347451	Adenylate cyclase	1.21	2	2	2143	237.167	7.29834	1.19991	1.10193	1.19442	1.16542	0.0349941
76343	Dynactin subunit 4	4.52	2	2	597	65.6839	6.82959	1.18109	1.14181	1.17273	1.16521	0.00518917
241580	3-alpha-(or 20-beta)-hydroxysteroid dehydrogenase	21.4	4	6	271	29.5541	6.94678	1.17257	1.15557	1.16739	1.16518	0.000926147
350735	Probable V-type proton ATPase 20 kDa proteolipid subunit	3.5	1	1	200	20.2137	5.0083	1.07897	1.10891	1.30636	1.16475	0.147176
351029	ATP-dependent RNA helicase mtr4	19.51	18	24	1112	125.417	6.85889	1.14068	1.18113	1.17171	1.16451	0.00547178
327590	Small nuclear ribonucleoprotein Sm D1	40	3	6	115	12.3025	11.1216	1.12376	1.21182	1.15561	1.16373	0.0238356
68217	--	6.74	1	1	178	18.5339	4.80518	1.12013	1.13984	1.2303	1.16343	0.0404768
274133	tRNA ligase 1	22.29	15	19	821	92.0112	7.1958	1.21933	1.11565	1.15499	1.16332	0.0325722
265668	Protein MAM3	12.43	9	11	708	76.011	5.59229	1.13203	1.17239	1.18532	1.16325	0.00952567
249472	MAP kinase kinase PBS2	16.1	8	9	646	68.0281	6.20166	1.14965	1.13217	1.20733	1.16305	0.0188476
332482	--	2.34	1	1	385	40.5324	4.85596	1.23068	1.12183	1.13645	1.16299	0.0411133
243012	Probable peptide methionine sulfoxide reductase	20.49	3	3	205	23.0192	6.94678	1.14116	1.18032	1.16743	1.16297	0.00496081
331682	--	7.27	1	1	110	12.174	5.70654	1.17268	1.16028	1.15384	1.16227	0.00115888
351147	Rho guanine nucleotide exchange factor scd1	10.35	9	11	966	107.119	6.58057	1.14595	1.19208	1.14841	1.16215	0.00843051
248171	Homeobox protein HOY1	11.13	5	5	575	62.8175	6.99072	1.1191	1.14019	1.22698	1.16209	0.0390664
60622	ATP-dependent bile acid permease	0.91	1	1	1315	147.334	6.75635	1.08931	1.2596	1.13722	1.16204	0.0855312
353904	Bifunctional solanapyrone synthase	20.7	6	7	401	42.5732	4.53857	1.17667	1.09775	1.21109	1.16184	0.0403866
229271	S-adenosylmethionine decarboxylase proenzyme	1.78	1	1	505	55.0641	5.16064	1.18548	1.25249	1.04737	1.16178	0.115649
325455	Serine/threonine-protein kinase ppk23	5.45	1	1	477	52.9738	9.12939	1.26145	1.01625	1.20672	1.16147	0.161874
295361	Mitochondrial genome maintenance protein MGM101	38.14	8	14	291	31.4817	9.29053	1.20866	1.16156	1.11266	1.16096	0.0283877
223101	Vacuolar protein sorting-associated protein 21	84.71	16	41	242	25.2057	5.22412	1.12948	1.17165	1.18169	1.16094	0.00973483
355253	Glycerol-1-phosphate phosphohydrolase 2	7.95	1	1	176	18.5946	5.12256	1.10613	1.21345	1.16302	1.16087	0.035185
337917	--	7.87	4	5	572	62.3579	5.24951	1.1016	1.15835	1.22255	1.16083	0.0440855
332481	Protein transport protein SSO2	31.71	9	17	287	32.3716	7.29834	1.16086	1.17052	1.15095	1.16078	0.00123176
280533	F-box protein At5g06550	14.37	4	4	327	37.3284	5.021	1.15733	1.17797	1.14698	1.16076	0.0031953
227801	Adenosine deaminase CECR1-A	8.64	5	5	521	60.32	7.12256	1.19886	1.13978	1.14323	1.16063	0.0139114
258610	CTP synthase	40.89	19	32	560	61.7399	6.45557	1.18146	1.11433	1.18566	1.16049	0.0201108
61010	Pre-rRNA-processing protein ESF2	4.61	1	1	282	32.0033	8.80713	1.13962	1.14112	1.20023	1.16032	0.0151439
345259	Succinate--hydroxymethylglutarate CoA-transferase	2.53	1	1	396	42.9949	6.69775	1.20411	1.09153	1.18507	1.16024	0.0440509
220772	COMPASS component SWD2	8.31	3	3	385	42.6172	6.68311	1.19891	1.10262	1.17804	1.15986	0.0318814
345549	Protein scd2/ral3	10.98	6	6	583	64.1407	5.66846	1.13163	1.15871	1.18876	1.1597	0.0105062
231980	Negative regulator of the PHO system	41.05	11	30	324	37.133	8.00146	1.14613	1.17144	1.1599	1.15916	0.002105
103599	Alpha-acetolactate decarboxylase	25.31	4	8	241	25.665	5.64307	1.19536	1.17999	1.102	1.15912	0.0314407
233391	(S)-2-haloacid dehalogenase 1	4.66	1	1	236	26.195	5.23682	1.14238	1.15099	1.18396	1.15911	0.00628212
328715	Rho guanine nucleotide exchange factor gef2	10.12	12	16	1581	175.052	8.42627	1.11905	1.17331	1.18465	1.159	0.0158216
259798	Protein rax1	2.82	1	1	354	39.9686	6.56592	1.10151	1.14823	1.22663	1.15879	0.0489904
220267	Probable trans-2-enoyl-CoA reductase, mitochondrial	37.98	15	20	387	41.4803	8.06006	1.17245	1.15622	1.14745	1.15871	0.0021228
226906	Uncharacterized transcriptional regulatory protein C1327.01c	1.72	1	1	581	65.116	8.93896	1.23367	1.07712	1.16338	1.15806	0.0731485
220487	Probable 4-hydroxy-2-oxoglutarate aldolase, mitochondrial	23.16	8	10	380	39.995	6.37939	1.18206	1.15736	1.13443	1.15795	0.00749848
275729	Elongation factor 2	65	1	238	840	92.4931	6.88818	1.11638	1.19396	1.16271	1.15768	0.0198208
230643	Endothiapepsin	12.98	3	10	393	41.5689	4.27197	1.10324	1.19568	1.1731	1.15734	0.0298745
13907	--	5.11	1	1	528	57.1027	4.50049	0.864038	1.43836	1.16948	1.15729	0.443152
226924	Uncharacterized WD repeat-containing protein C26H5.03	15.5	9	10	716	76.0911	8.19189	1.22446	1.11155	1.13577	1.15726	0.0444704
332899	--	27.83	3	3	115	12.405	5.45264	1.04379	1.22275	1.2051	1.15721	0.109962
259186	--	7.28	5	5	701	75.0696	9.34912	1.14844	1.14451	1.17862	1.15719	0.00466518
222269	Transcription initiation factor IIE subunit beta	7.37	2	3	285	32.0949	9.77393	1.12564	1.19945	1.14644	1.15718	0.0189896
221442	Casein kinase II subunit beta-1	16.22	5	7	339	38.2411	4.67822	1.18096	1.0984	1.19164	1.157	0.033461
232095	--	9.93	3	5	302	33.0346	6.90283	1.15792	1.12824	1.18454	1.1569	0.01057
353113	Probable tubulin--tyrosine ligase PBY1	15	10	16	800	87.5801	4.91943	1.18385	1.15076	1.136	1.15687	0.00803407
232938	Probable phosphatase SPAC5H10.03	22.58	6	9	248	27.2886	6.26514	1.14827	1.13644	1.18555	1.15676	0.00879467
329614	--	68.26	9	15	167	18.117	5.2749	1.14423	1.23974	1.08621	1.15673	0.0727721
353544	--	1.54	2	2	1554	169.019	8.33838	1.11475	1.14953	1.20583	1.15671	0.0274971
328586	DNA polymerase delta subunit 3	7.97	3	4	389	42.3734	8.66064	1.17193	1.17494	1.12166	1.15617	0.0120233
349539	Flavin carrier protein 2	5.15	3	4	758	81.2355	7.66455	1.1477	1.18062	1.13965	1.15599	0.00639093
237368	--	1.51	1	1	595	65.7935	8.76318	1.18023	1.09875	1.18769	1.15556	0.0319335
340124	Sporulation protein RMD8	11.16	5	6	627	70.1138	5.93506	1.08808	1.20419	1.17437	1.15555	0.0466189
350330	--	8.68	1	1	265	29.2715	5.96045	1.17953	1.15917	1.12772	1.15547	0.00926472
245225	--	26.86	5	5	175	18.5236	9.78857	1.12807	1.1719	1.16588	1.15528	0.00771336
67852	--	8.35	9	10	1173	131.213	4.65283	1.13752	1.15986	1.16758	1.15499	0.00336578
258486	Histidine protein kinase NIK1	41.32	43	67	1314	144.178	5.89697	1.16986	1.14643	1.14792	1.15474	0.00238717
327346	Splicing factor 3B subunit 6-like protein	50.88	5	9	114	12.9407	9.17334	1.17688	1.13667	1.14988	1.15448	0.00581868
231481	Tryptophan--tRNA ligase, mitochondrial	4.39	1	1	342	37.7425	6.46826	1.13234	1.15153	1.17865	1.15417	0.0075075
226579	Protein mesA	2.85	2	2	807	90.1734	6.80029	1.1873	1.08179	1.19342	1.15417	0.0510439
243457	Protein transport protein bet1	8.88	1	2	169	18.3721	9.34912	1.15017	1.16095	1.15136	1.15416	0.000489577
218876	Ribosomal lysine N-methyltransferase 4	6.05	2	2	496	54.5921	4.62744	1.18367	1.20148	1.07729	1.15415	0.0578319
234126	PRKR-interacting protein 1 homolog	4.9	1	1	143	16.4207	9.89111	1.11886	1.16582	1.17726	1.15398	0.013198
230646	--	2.02	1	1	396	42.436	6.45557	1.16348	1.12294	1.17508	1.15383	0.010391
221749	L-threo-3-deoxy-hexylosonate aldolase	15.06	6	6	312	33.342	5.57959	1.16564	1.13863	1.15631	1.15352	0.00265117
353238	Protein hir-1	3.99	5	5	1228	133.202	8.29443	1.16897	1.17635	1.11385	1.15306	0.0161929
336041	Histone acetyltransferase type B catalytic subunit	11.09	5	6	478	54.3341	6.15088	1.1722	1.17057	1.11634	1.15304	0.014085
263212	--	10.94	5	7	521	58.8702	6.50732	1.04679	1.24016	1.17201	1.15298	0.114041
227337	Putative RNA polymerase II transcription factor B subunit 1	4.75	2	2	631	69.5653	6.07471	1.15239	1.10075	1.20528	1.15281	0.0368567
223116	Methionyl-tRNA formyltransferase, mitochondrial	6.19	1	1	210	22.5993	9.39307	1.11914	1.18371	1.15454	1.15246	0.0146653
273350	[NU+] prion formation protein 1	25.37	24	45	1092	119.025	6.1001	1.16212	1.13662	1.15825	1.15233	0.00270291
332951	DNA replication licensing factor mcm4	15.59	14	18	962	106.028	6.354	1.18732	1.1067	1.16229	1.1521	0.0236651
351885	Pre-mRNA-splicing factor clf-1	8.08	5	5	668	80.2485	5.88428	1.07236	1.26445	1.11911	1.15197	0.119435
109010	DnaJ homolog subfamily C member 3	30.13	13	17	521	57.5832	6.84424	1.15224	1.15366	1.14994	1.15194	5.08e-05
215674	Serine/threonine-protein kinase RAD53	0.94	1	1	1176	132.396	6.06201	1.16169	1.17313	1.1202	1.15168	0.011052
225378	Dedicator of cytokinesis protein 1	1.56	3	3	1919	213.968	5.68115	1.14215	1.14031	1.1721	1.15152	0.0045921
333918	--	1.61	1	1	497	56.4696	7.75244	1.13299	1.16711	1.15443	1.15151	0.00429052
333006	CWF19-like protein 1 homolog	7.16	3	3	461	51.3466	5.51611	1.13179	1.17363	1.14908	1.1515	0.00635803
281819	--	3.43	3	3	933	104.308	5.40186	1.14526	1.16824	1.14054	1.15135	0.00318222
232523	Mitochondrial ATPase complex subunit ATP10	6.49	1	1	262	30.436	10.0669	1.15647	1.11631	1.18083	1.1512	0.0151273
258131	Zinc-type alcohol dehydrogenase-like protein C16A3.02c	25.41	8	9	362	38.2873	9.33447	1.19642	1.12087	1.13565	1.15098	0.0226465
235272	Nonribosomal peptide synthetase 12	1.72	4	4	2506	275.811	6.46826	1.1878	1.13023	1.13484	1.15096	0.0146431
277897	Cobalt uptake protein COT1	1.42	1	2	563	61.0515	6.58057	1.1749	1.13738	1.14036	1.15088	0.0063098
273643	Chitin synthase 4	6.93	7	7	1183	131.64	8.22119	1.19821	1.10301	1.15125	1.15082	0.0316376
266577	General negative regulator of transcription subunit 1	22.88	42	66	2159	240.404	5.57959	1.17012	1.16405	1.11811	1.15076	0.0116533
219234	D-lactate dehydrogenase	13.28	5	5	482	52.145	5.80811	1.1537	1.17444	1.12388	1.15067	0.00935411
233838	--	6.18	1	1	178	18.272	5.17334	1.12865	1.13133	1.19166	1.15055	0.0181657
345180	--	9.79	2	3	470	50.7594	8.646	1.11276	1.17971	1.15912	1.15053	0.016859
108221	E3 ubiquitin-protein ligase RSP5	34.04	23	41	802	90.8054	6.72705	1.18707	1.13149	1.13289	1.15048	0.0144657
327409	Diacylglycerol O-acyltransferase 2A	19.76	8	11	491	54.7076	6.7417	1.14061	1.15105	1.15968	1.15045	0.00133975
327449	Uncharacterized protein YFR016C	29.05	9	19	451	46.4535	5.50342	1.06687	1.17718	1.20607	1.15004	0.0714486
84461	Probable ubiquitin carboxyl-terminal hydrolase 8	2.07	1	1	435	49.1439	7.2251	1.18095	1.12545	1.14316	1.14986	0.0117216
97566	Dehydrodolichyl diphosphate syntase complex subunit SPAC4D7.04c	11.11	4	4	333	38.0571	7.25439	1.12899	1.11633	1.20311	1.14948	0.0312579
258232	Target of rapamycin complex 1 subunit mip1	5.57	6	6	1401	157.588	7.2251	1.20609	1.08876	1.15304	1.1493	0.0479401
279301	Vacuolar protein sorting-associated protein 41 homolog	8.95	7	7	1207	133.515	6.13818	1.09893	1.21996	1.12896	1.14928	0.0545892
332236	Ribosome biogenesis protein TSR3	7.26	3	3	413	45.9804	5.19873	1.17644	1.16193	1.10944	1.14927	0.0180868
276755	Iron-sulfur assembly protein 1	14.11	2	3	241	26.4684	9.42236	1.20279	1.16356	1.08092	1.14909	0.0534242
218802	Uncharacterized protein C8E11.05c	31.18	5	18	465	50.4399	4.70361	1.1093	1.24578	1.09205	1.14904	0.0919887
226499	Putative metal ion transporter C17A12.14	3.5	2	2	772	86.9994	6.63916	1.17941	1.12217	1.14504	1.14887	0.0122556
281341	Probable endo-1,3(4)-beta-glucanase ARB_01444	7.52	2	2	399	42.2931	6.13818	1.17618	1.10895	1.16117	1.14876	0.0182451
328343	Transcriptional adapter 2	3.7	2	3	513	57.6	7.29834	1.1689	1.16619	1.11071	1.1486	0.0158963
215272	Vacuolar protein sorting-associated protein 13	15.12	40	51	3167	354.47	5.87158	1.16639	1.13354	1.14565	1.14852	0.00414448
223794	DNA polymerase delta subunit 4	4.62	1	1	195	21.4612	8.06006	1.14192	1.14447	1.15882	1.1484	0.0012533
221079	Probable GTP cyclohydrolase-2	10	3	5	380	41.0586	5.63037	1.2204	1.0903	1.13446	1.14839	0.0603283
221674	Lactoylglutathione lyase	47.81	11	22	320	36.2986	6.06201	1.16	1.16878	1.11573	1.14817	0.0120558
228403	Probable mRNA-splicing protein ubp10	7.26	4	5	551	62.2247	6.22705	1.13164	1.13939	1.17347	1.14817	0.007435
36484	Bud site selection protein 6	22.99	21	29	957	104.629	8.35303	1.15073	1.12703	1.16654	1.1481	0.00595664
332396	--	8.56	4	4	619	66.6335	9.0415	1.15958	1.15545	1.12918	1.14807	0.00410619
263131	Zinc-binding alcohol dehydrogenase domain-containing protein cipB	28.13	7	11	320	32.8325	6.22705	1.12544	1.1596	1.15834	1.14779	0.00567803
222489	Transcription initiation factor TFIID subunit 3	16.97	2	3	218	23.745	4.93213	1.1802	1.11273	1.1497	1.14755	0.0170345
215359	Protein rad9	0.72	2	2	1812	200.268	6.37939	1.1852	1.0829	1.17306	1.14706	0.0449247
235557	Phosphoinositide 3-kinase regulatory subunit 4	0.98	1	1	1535	169.947	6.82959	0.996681	1.27822	1.16527	1.14672	0.214724
217467	Uncharacterized ABC transporter ATP-binding protein C323.04	13.33	6	6	660	72.7341	6.96143	1.1773	1.18379	1.07849	1.14653	0.050035
236078	--	4.66	2	4	794	89.5176	5.08447	1.2642	1.13072	1.04439	1.14643	0.149147
235751	--	18.28	17	26	1056	112.303	4.48779	1.11969	1.13603	1.18356	1.14643	0.0166893
344553	Nuclear cap-binding protein subunit 1	20.93	16	26	860	95.6637	5.79541	1.12659	1.20196	1.11028	1.14628	0.0353077
221630	--	10.81	2	4	296	32.2841	8.35303	1.15966	1.15409	1.12383	1.14586	0.00577418
235296	Lovastatin diketide synthase LovF	0.58	1	1	2057	223.57	6.50732	1.10078	1.10242	1.23374	1.14565	0.0805655
345410	Structural maintenance of chromosomes protein 2	23.64	27	36	1180	132.405	8.54346	1.15681	1.14948	1.13008	1.14546	0.00299182
335440	E3 ubiquitin-protein ligase DMA2	2.81	2	2	641	68.3322	6.0874	1.17265	1.13427	1.12921	1.14538	0.00878192
324263	--	45.31	1	11	64	7.33167	5.14795	1.07453	1.11489	1.24652	1.14531	0.107496
351534	Glutathione S-transferase kappa 1	2.78	1	1	216	23.6703	6.771	1.08187	1.14521	1.20864	1.14524	0.0580128
267668	Tumor susceptibility gene 101 protein	4.92	2	2	528	57.8418	9.15869	1.07227	1.21792	1.14509	1.1451	0.0746877
96427	--	2.19	1	1	503	55.0402	4.95752	1.01378	1.0749	1.34629	1.14499	0.291731
252954	Palmitoyl-protein thioesterase 1	6.45	2	4	310	34.5891	4.93213	1.13882	1.18514	1.11092	1.14496	0.0215768
337075	Beige protein homolog 1	10.59	10	49	2862	321.998	7.73779	1.17798	1.04929	1.20708	1.14478	0.0962176
274996	--	43.98	7	13	191	21.3452	4.76709	1.1869	1.19192	1.05498	1.1446	0.0841794
236209	--	1.08	1	2	927	102.772	6.91748	1.1371	1.11982	1.17651	1.14448	0.013218
225337	Ubiquitin carboxyl-terminal hydrolase 34	4.1	7	7	2218	251.049	5.70654	1.10231	1.12071	1.20973	1.14425	0.0490183
223626	DNA polymerase epsilon subunit C	23.61	3	3	144	16.0955	9.70068	1.13466	1.16273	1.135	1.14413	0.00413771
67581	--	6.78	5	6	737	82.5713	6.81494	1.18997	1.10325	1.13892	1.14404	0.0291896
275275	Uncharacterized protein C13G1.09	21.53	9	12	497	55.3279	4.99561	1.11641	1.20903	1.10639	1.14394	0.047845
328560	Golgi apyrase	3	2	2	667	73.7481	6.17627	1.14161	1.13345	1.15606	1.14371	0.00210885
219854	Actin-related protein 6	6.11	3	3	442	49.3914	7.12256	1.1416	1.11656	1.17264	1.1436	0.0125169
327009	Uncharacterized protein YKR070W	9.07	4	4	507	55.7169	6.26514	1.12885	1.14123	1.15857	1.14288	0.00362078
221783	--	3.27	1	1	245	26.237	9.49561	1.15921	1.15428	1.11501	1.14283	0.00944958
220883	Bis(5'-nucleosyl)-tetraphosphatase, symmetrical	32.18	9	10	404	43.392	6.32861	1.14264	1.13527	1.15025	1.14272	0.000916182
235933	Sulfite reductase	15.53	13	16	1037	113.064	5.36377	1.18236	1.10426	1.13976	1.14213	0.0243175
100881	Cell division cycle protein 123	13.72	6	6	430	47.7981	4.7417	1.14327	1.13353	1.14947	1.14209	0.00106462
107013	--	1.31	1	1	764	85.3347	8.646	1.15679	1.08443	1.18394	1.14172	0.0412131
328675	--	8.38	1	1	167	18.4755	6.27783	1.14806	1.14865	1.12807	1.14159	0.00227376
332112	Uncharacterized glycosyl hydrolase YIR007W	29.22	17	23	770	86.3721	5.49072	1.16813	1.11844	1.13748	1.14135	0.010321
350736	Mitotic checkpoint protein BUB3.2	29.83	6	13	352	37.9318	6.02393	1.07632	1.20699	1.14058	1.1413	0.0644678
348460	Meiotically up-regulated gene 65 protein	8.99	3	3	367	41.8128	6.55127	1.16322	1.14701	1.11344	1.14122	0.0106031
219113	Protein STE50	14.4	7	12	486	52.8222	5.47803	1.11758	1.09939	1.20663	1.1412	0.0509
105334	E3 ubiquitin ligase complex SCF subunit scon-3	77.44	12	26	164	18.8795	4.69092	1.15692	1.15991	1.10649	1.14111	0.0147511
251623	Nucleolar GTP-binding protein 1	14.68	9	12	654	74.0915	8.99756	1.13228	1.18654	1.104	1.14094	0.0282758
259857	Phosphopantothenate--cysteine ligase CAB2	31.76	10	13	381	42.1998	6.43018	1.16204	1.15417	1.10615	1.14079	0.0150485
324463	--	4.6	1	1	174	19.8921	6.27783	1.14275	1.12833	1.1509	1.14066	0.00219245
283322	Uracil-regulated protein 1	42.21	13	23	398	44.5017	6.69775	1.11788	1.1529	1.15108	1.14062	0.0064857
334644	Flavin carrier protein 1	5.96	1	1	285	31.0305	7.34229	1.1435	1.14483	1.13334	1.14056	0.000666403
327348	26S protease regulatory subunit 7 homolog	68.79	28	67	439	48.9812	6.30322	1.17213	1.15372	1.09565	1.1405	0.0258679
327307	Peptidyl-prolyl cis-trans isomerase cyp15	6.05	4	4	595	66.7891	8.104	1.1068	1.13967	1.17487	1.14045	0.0190232
338403	25S rRNA (adenine-N(1))-methyltransferase	5.27	1	2	531	57.6811	9.61279	1.13231	1.21039	1.07805	1.14025	0.0674989
253694	Cystathionine beta-lyase	31.08	9	10	444	47.795	6.59521	1.13363	1.15416	1.13261	1.14013	0.0024996
321252	--	50.83	17	48	362	40.1657	6.65381	1.16157	1.13071	1.12728	1.13985	0.00602341
272996	Phosphatidylinositol 3,4,5-trisphosphate 5-phosphatase 1	3.88	2	2	515	56.8278	5.38916	1.19927	1.07377	1.14572	1.13959	0.0616406
215564	Exocyst complex component 1	3.66	4	4	1311	145.829	6.39209	1.10086	1.16257	1.15482	1.13942	0.0188313
247557	Chitinase 1	12.22	3	5	360	39.6629	4.98291	1.14478	1.15664	1.1158	1.13907	0.00752
358381	Fe-S cluster assembly protein DRE2	14.07	4	6	263	27.8792	4.65283	1.11723	1.18285	1.11624	1.13878	0.0243084
226239	Zinc finger protein klf1	1.28	1	1	941	104.212	7.07861	1.10085	1.20153	1.11347	1.13862	0.048437
223668	Translocator protein homolog	15.14	3	6	185	20.1276	9.46631	1.18418	1.09306	1.13846	1.13857	0.0342026
342588	Protein N-methyltransferase nnt1	9.29	2	3	269	30.8067	5.56689	1.11949	1.14647	1.14959	1.13852	0.00472479
347488	Pre-mRNA-processing ATP-dependent RNA helicase PRP5	6.42	6	8	1168	128.034	8.49951	1.13799	1.14097	1.13635	1.13844	9.52e-05
101899	--	35.1	6	11	208	23.3916	5.60498	1.09353	1.1924	1.12826	1.13806	0.0412925
353351	Ubiquitin carboxyl-terminal hydrolase 4	2.49	2	2	924	102.427	7.86963	1.17984	1.09087	1.14301	1.13791	0.0332869
66584	--	16.27	4	4	252	27.9769	5.05908	1.06494	1.15516	1.19358	1.1379	0.0686641
354027	Methylglutaconyl-CoA hydratase, mitochondrial	3.13	1	1	288	30.756	6.41748	1.22807	1.12273	1.06222	1.13767	0.104766
71769	Streptothricin hydrolase	58.03	10	14	193	21.557	5.13525	1.12392	1.11703	1.17203	1.13766	0.0154304
283333	Putative metallocarboxypeptidase ecm14	9.44	3	3	498	55.9605	4.99561	1.1197	1.14067	1.1526	1.13766	0.00484457
258058	Ubiquitin-conjugating enzyme E2 N	57.72	7	18	149	16.7769	6.01123	1.13638	1.18173	1.09456	1.13756	0.0318923
282458	Nucleoporin NUP85	21.73	16	25	1031	113.601	4.85596	1.13668	1.13344	1.14237	1.1375	0.000359871
66053	--	5.58	1	1	269	28.448	9.93506	1.21983	0.980833	1.2115	1.13739	0.221466
274218	Pre-rRNA-processing protein esf1	9.56	5	5	659	74.7498	4.76709	1.09903	1.23735	1.07541	1.13726	0.11291
216590	Cell division control protein 48	78.17	51	208	820	89.8565	5.09717	1.15106	1.13865	1.12167	1.13712	0.00383732
241892	--	9.68	2	2	279	30.1326	7.75244	1.13647	1.1444	1.13009	1.13699	0.000910953
244748	Alpha-glucosidase	31.78	16	23	579	66.1094	5.19873	1.1272	1.1469	1.13669	1.13693	0.00171984
328960	DNA damage-binding protein 1a	12.88	12	12	1149	127.517	5.49072	1.12876	1.12287	1.15903	1.13689	0.00662787
225617	Anucleate primary sterigmata protein A	1.12	1	1	1334	146.338	9.78857	1.14888	1.09133	1.16995	1.13672	0.0282874
349747	--	7.89	1	3	304	35.2122	10.1401	1.13681	1.2078	1.06427	1.13629	0.0813073
341018	Vacuolar import and degradation protein 27	22.47	17	27	801	90.0529	4.94482	1.17438	1.09963	1.13455	1.13619	0.0242258
235690	UPF0507 protein YALI0E18612g	2.84	3	3	1304	145.451	6.59521	1.19131	1.10752	1.10906	1.13596	0.0390307
68354	--	2.72	1	1	405	44.389	5.46533	1.14813	1.11013	1.14916	1.13581	0.00882288
238114	Cytoplasmic dynein 1 light intermediate chain 1	2.66	1	1	526	58.7003	4.85596	1.14214	1.12855	1.1362	1.13563	0.000840503
241048	--	31.87	8	10	320	33.5245	7.86963	1.14448	1.10014	1.16222	1.13561	0.0180326
105258	Protein kri1	3.85	2	2	676	76.5422	4.98291	1.14396	1.14912	1.11374	1.13561	0.00655525
230631	UBX domain-containing protein 1	35.42	13	26	415	44.771	5.49072	1.12999	1.16858	1.1081	1.13556	0.0165843
276660	DNA repair helicase rad15	8.9	6	6	753	85.9685	5.87158	1.19843	1.0921	1.11544	1.13532	0.0524253
349276	--	1.52	1	1	593	63.3571	6.12549	1.10447	1.15212	1.14897	1.13519	0.0127042
253801	Vacuolar calcium ion transporter	10.63	4	7	574	62.1891	5.63037	1.18176	1.10922	1.11431	1.1351	0.0286661
257260	Ribonuclease 3	9.46	3	4	370	41.3364	8.6167	1.19347	1.17932	1.03243	1.13507	0.119737
351485	Serine/threonine-protein phosphatase ppe1	16.8	6	7	381	41.7989	5.46533	1.15228	1.1606	1.09232	1.13507	0.0244299
97017	Leucine--tRNA ligase, mitochondrial	9.57	6	14	1076	119.884	6.39209	1.14454	1.13437	1.12552	1.13481	0.00165624
267472	Transcription elongation factor SPT6	29.22	38	49	1417	163.135	4.91943	1.15937	1.12824	1.1168	1.1348	0.00878393
349749	--	3.45	2	2	406	43.8129	5.21143	1.18655	1.10243	1.11535	1.13478	0.0356575
353742	--	4.15	1	1	289	29.9166	5.0083	1.05562	1.17989	1.16836	1.13462	0.076852
278042	RNA polymerase II subunit A C-terminal domain phosphatase ssu-72	13.82	2	2	217	24.2061	5.32568	1.14789	1.1375	1.11829	1.13456	0.00412626
279703	Transcriptional activator spt7	2.83	3	3	1059	116.73	5.35107	1.15434	1.16583	1.08236	1.13418	0.0358698
336206	Peroxisomal biogenesis factor 3	1.68	1	1	537	59.525	5.24951	1.15377	1.20422	1.04429	1.13409	0.104806
250764	PARP-type zinc finger-containing protein C13F5.07c	11.06	2	2	199	22.7914	8.19189	1.07325	1.1465	1.18221	1.13399	0.0527911
249266	Oxysterol-binding protein homolog 4	37.44	12	24	414	45.5093	7.32764	1.15386	1.12504	1.12229	1.13373	0.00564992
10839	Anucleate primary sterigmata protein B	5.91	6	7	1337	151.102	5.47803	1.11284	1.15423	1.13398	1.13368	0.00789238
258635	Endoplasmic reticulum oxidoreductin-1	46.78	19	36	575	65.3881	5.63037	1.14563	1.13667	1.11841	1.13357	0.003576
274378	Pre-mRNA-splicing factor cwf19	4.04	2	3	717	83.4276	6.58057	1.05233	1.1857	1.1624	1.13348	0.0832497
220596	Histone acetyltransferase GCN5	4.64	2	2	388	45.026	8.71924	1.15954	1.10535	1.13528	1.13339	0.0135226
239202	--	7.63	4	4	472	52.7351	9.15869	1.12084	1.06146	1.2178	1.13337	0.099593
322701	Transcription initiation factor TFIID subunit 9	12.66	2	2	229	23.0685	9.18799	1.07507	1.19899	1.12544	1.13317	0.0658672
231298	--	3.28	1	1	305	34.0766	5.16064	1.17153	1.07754	1.15	1.13302	0.042763
61730	--	12.93	3	4	317	33.847	10.4331	1.11673	1.1138	1.16754	1.13269	0.0168461
243532	--	4.19	1	1	167	18.2383	5.09717	1.134	1.11631	1.14742	1.13258	0.00458573
334356	Polyadenylate-binding protein 3	24.39	4	8	164	17.911	10.0522	1.09624	1.17422	1.12707	1.13251	0.0280519
264529	Cleavage stimulation factor subunit 2	21.36	4	7	309	31.743	4.67822	1.05481	1.182	1.16061	1.13247	0.0779346
336942	Probable Rho-GTPase-activating protein 7	29.1	19	22	701	76.5711	7.07861	1.14043	1.11937	1.13723	1.13234	0.00244153
293561	ATP-dependent RNA helicase MSS116, mitochondrial	20.04	7	8	464	50.3145	9.77393	1.0925	1.13865	1.1657	1.13228	0.0251172
270080	Ubiquitin homeostasis protein lub1	37.1	24	39	787	84.21	5.80811	1.1644	1.09427	1.1374	1.13203	0.0231031
232522	Probable hydrolase nit2	5.23	2	2	325	34.9206	6.53662	1.0471	1.17747	1.17133	1.13197	0.0898332
271545	Putative transferase CAF17, mitochondrial	15.74	2	2	235	25.6751	5.09717	1.02353	1.16749	1.20437	1.1318	0.139474
259290	AMP deaminase	20.27	17	22	947	107	6.59521	1.15164	1.125	1.11871	1.13178	0.00581515
102285	Uncharacterized protein DR_0888	82.35	16	93	204	23.3072	5.09717	1.1516	1.17802	1.06566	1.13176	0.0603299
325143	Pre-mRNA cleavage factor Im 25 kDa subunit 2	35.25	6	8	261	29.5808	5.64307	1.13298	1.14919	1.11305	1.13174	0.00623238
219844	Vacuolar protein sorting-associated protein 4	39.32	13	23	440	48.3456	6.85889	1.1188	1.15249	1.12348	1.13159	0.00635011
61978	Serine/threonine-protein kinase sid2	14.93	8	9	643	72.9128	8.42627	1.18446	1.08998	1.12005	1.1315	0.0421002
228358	Putative amidase C550.07	3.39	2	2	560	60.5688	5.97314	1.18811	1.04426	1.1621	1.13149	0.0970639
222212	Uncharacterized J domain-containing protein C1071.09c	17.76	5	9	304	33.8922	5.73193	1.12696	1.16659	1.10034	1.1313	0.020818
216842	Probable glucan endo-1,3-beta-glucosidase ARB_02077	1.32	1	1	757	80.7101	4.52588	1.13579	1.02828	1.22918	1.13108	0.152451
259122	D-amino-acid oxidase	19.68	6	6	376	40.3823	6.7417	1.16593	1.14611	1.08107	1.13104	0.0361926
217258	Acetyl-coenzyme A synthetase	40.09	27	66	661	73.3776	6.50732	1.16105	1.12178	1.11024	1.13102	0.0134972
275473	Mitochondrial division protein 1	21.28	10	10	611	67.4944	5.30029	1.1485	1.09807	1.14615	1.13091	0.0153967
245291	GTPase-activating protein GYP7	8.16	6	7	809	91.6924	6.16357	1.15813	1.12204	1.11248	1.13088	0.0110927
239331	Zinc-type alcohol dehydrogenase-like protein C1198.01	3.56	2	2	450	49.3095	5.89697	1.16891	1.0607	1.16115	1.13025	0.0647144
328683	--	2.11	1	1	332	36.1973	7.02002	1.08388	1.11147	1.19501	1.13012	0.0600431
223527	FAD-linked sulfhydryl oxidase ERV2	27.13	4	7	188	20.7872	8.01611	1.09563	1.19016	1.1043	1.13003	0.0498392
328325	Pre-mRNA polyadenylation factor FIP1	12.58	3	5	326	34.0903	4.32275	1.0334	1.12	1.23519	1.12953	0.157008
272520	Clock-controlled protein 8	2.46	1	1	447	48.1559	7.2251	1.13672	1.1216	1.12994	1.12942	0.0011393
98951	mRNA-capping enzyme subunit beta	2.94	2	2	849	94.4642	9.61279	1.18576	1.11608	1.08609	1.12931	0.0483782
349525	AP-3 complex subunit delta	4.83	4	4	973	107.368	5.37646	1.06707	1.13402	1.18642	1.12917	0.0646354
334402	Coenzyme A biosynthesis protein 3	9.81	2	2	265	28.4408	6.22705	1.09996	1.17304	1.11411	1.12904	0.0287844
231742	Pumilio homolog 2	26.22	7	10	328	37.9604	8.07471	1.11492	1.15075	1.12037	1.12868	0.00741984
61324	Protein transport protein sec1	20.03	11	14	694	79.5058	7.50342	1.1532	1.11398	1.11869	1.12862	0.00911614
269105	Eukaryotic translation initiation factor 4E type 3	20.08	5	9	249	28.4093	7.10791	1.16256	1.15763	1.06527	1.12848	0.0556323
104977	Catechol O-methyltransferase	64.11	14	24	248	27.2751	6.17627	1.14851	1.12952	1.1071	1.12838	0.00858278
218574	Sad1-interacting factor 2	8.27	3	4	508	56.7858	5.77002	1.15323	1.08659	1.14527	1.12836	0.0257667
220322	Mannan polymerase II complex ANP1 subunit	29.7	12	21	404	46.2396	7.04932	1.16116	1.09312	1.13072	1.12834	0.0227094
226693	--	1.72	1	1	756	84.7992	8.49951	1.10325	1.15877	1.12294	1.12832	0.0156638
255999	--	36.26	6	13	171	19.3413	9.24658	1.12088	1.15227	1.11177	1.12831	0.0090134
221228	INO80 complex subunit 1	12.17	4	4	345	38.1966	5.16064	1.10932	1.15194	1.123	1.12809	0.00948107
322686	--	3.29	1	1	243	27.0699	10.1987	1.04816	1.20609	1.12996	1.12807	0.106841
341170	Protein VAC14 homolog	1.66	2	2	904	99.7641	5.35107	1.19854	1.09248	1.09289	1.12797	0.0683296
333890	TATA-box-binding protein	9.77	3	4	256	27.6056	9.70068	1.14166	1.10188	1.14021	1.12792	0.0102104
100213	Uncharacterized protein C16C4.16c	9.17	3	4	447	50.1594	9.37842	1.06058	1.16907	1.1537	1.12778	0.063704
244353	--	10.34	1	1	58	6.70426	7.75244	1.08401	1.23752	1.06019	1.12724	0.149185
226482	Exosome complex exonuclease rrp6	13.58	7	7	795	89.9077	5.74463	1.12862	1.12613	1.12663	1.12713	3.58e-05
220430	--	19.63	4	6	326	35.5403	6.21436	1.07176	1.12231	1.18644	1.12684	0.062131
352611	--	2.86	1	1	455	51.1586	7.54736	1.14328	1.15712	1.08008	1.12683	0.0332252
265313	Serine/threonine-protein kinase ste20	11.8	9	10	881	96.3915	9.5835	1.12735	1.04137	1.21117	1.12663	0.122847
104400	Histone H2A.Z	46.85	8	27	143	15.2094	10.3452	1.11294	1.18702	1.07992	1.12663	0.0572268
275391	--	1.93	2	2	935	103.676	5.32568	0.972769	1.27257	1.1345	1.12661	0.281377
236147	mRNA 3'-end-processing protein RNA14	7.06	5	8	935	105.158	6.80029	1.11285	1.14304	1.12347	1.12646	0.004852
337187	37S ribosomal protein S22, mitochondrial	7.8	7	9	1013	112.616	5.47803	1.10891	1.13877	1.13124	1.12631	0.00499999
274426	Spindle assembly checkpoint component MAD1	7.83	5	5	690	78.7123	5.41455	1.09391	1.13192	1.1529	1.12624	0.0181954
325453	mRNA decapping complex subunit 2	11.77	8	8	909	99.1322	8.85107	1.05929	1.20839	1.11096	1.12622	0.101931
105373	Guanine nucleotide-binding protein subunit beta	50.97	15	39	359	39.8176	7.2251	1.15356	1.12207	1.10222	1.12595	0.0137908
218041	Probable Xaa-Pro aminopeptidase MGG_05684	7.04	3	3	469	52.1654	6.82959	1.11478	1.10554	1.15697	1.12576	0.0154719
253945	Uncharacterized protein C3D6.13c	20.52	13	16	658	74.561	7.04932	1.16064	1.08914	1.12626	1.12535	0.0260704
274114	Start control protein cdc10	5.99	4	4	785	85.2269	6.65381	1.12993	1.10168	1.14423	1.12528	0.00980759
338154	Exocyst complex protein exo70	4.37	3	3	618	68.8144	8.79248	1.12539	1.12106	1.1292	1.12522	0.000353051
217482	Lysophospholipase	4.72	2	2	593	62.8393	4.34814	1.10543	1.07233	1.19641	1.12472	0.0782207
221907	Arylamine N-acetyltransferase, pineal gland isozyme NAT-3	12.05	3	4	307	34.7678	7.00537	1.10862	1.12026	1.14359	1.12416	0.00678686
105597	COPII coat assembly protein sec16	7.6	12	17	2013	213.333	5.05908	1.14038	1.12575	1.10531	1.12381	0.00667926
261820	Nucleoporin POM152	15.09	15	20	1166	129.774	6.43018	1.14781	1.08717	1.13643	1.1238	0.0218544
223137	--	13.68	1	2	95	10.5344	5.87158	1.05744	1.23419	1.07949	1.1237	0.156096
351422	Centromere protein 3	15.67	8	10	651	71.1001	5.19873	1.09257	1.14815	1.1302	1.12364	0.0170971
256328	2-oxoglutarate dehydrogenase, mitochondrial	53.42	41	108	1009	113.909	6.43018	1.1484	1.12685	1.09563	1.12362	0.0150118
231523	26S proteasome regulatory subunit rpn-8	65.92	21	43	355	39.1744	5.93506	1.128	1.13135	1.11144	1.1236	0.00247105
340599	--	12.02	2	3	208	21.7023	9.64209	1.076	1.08924	1.20554	1.12359	0.0952816
281710	Uncharacterized protein C32A11.02c	8.87	5	5	699	78.5297	5.5542	1.09957	1.10505	1.16592	1.12351	0.0283815
255421	Guanylate kinase	51.78	9	16	197	22.0703	6.0874	1.11776	1.1673	1.08545	1.1235	0.0351964
328696	--	17.68	9	11	509	53.6178	5.60498	1.15335	1.11786	1.09923	1.12348	0.016125
249883	Uncharacterized protein C11E3.02c	9.71	11	12	1329	152.546	6.40479	1.14177	1.09255	1.13613	1.12348	0.0154949
221214	Pre-mRNA-splicing factor cwf17	28.69	7	9	352	37.8821	6.02393	1.1159	1.13007	1.12424	1.1234	0.00110992
330487	--	24.54	4	6	163	17.7737	4.51318	1.09337	1.15089	1.12583	1.12336	0.0177375
244532	Serine/threonine-protein phosphatase PP1	60.93	13	37	279	32.2791	5.17334	1.13185	1.09409	1.14357	1.12317	0.0143741
325105	--	23.32	5	5	193	20.3612	5.42725	1.1009	1.1042	1.16382	1.12298	0.0265479
269500	Transcription initiation factor TFIID subunit 5	22.46	12	14	708	77.6862	7.13721	1.15751	1.09295	1.11694	1.12247	0.0228608
256615	Vacuolar protein sorting-associated protein 11 homolog	12.38	9	10	953	106.296	5.5415	1.12784	1.11829	1.12099	1.12237	0.000539492
349661	Pre-mRNA-splicing factor sap61	15.9	7	10	503	58.1667	5.47803	1.162	1.15615	1.04826	1.12213	0.0807148
73146	Probable ubiquitin carboxyl-terminal hydrolase 3	22.28	17	21	938	101.731	7.15186	1.14696	1.11539	1.10294	1.12177	0.0113782
221740	--	15.41	4	4	318	34.3895	9.87646	1.1388	1.08891	1.13711	1.12161	0.0176137
248275	Bud site selection protein BUD4	4.67	6	7	1393	155.742	5.22412	1.11089	1.10692	1.14694	1.12158	0.0107894
226810	N-alpha-acetyltransferase, 35 NatC auxiliary subunit	5.08	4	4	728	82.9507	6.1001	1.14188	1.09809	1.1238	1.12126	0.010801
330030	--	3.98	1	1	352	37.8833	7.02002	1.1021	1.1274	1.13414	1.12121	0.00641068
101739	Putative carboxymethylenebutenolidase	30.28	7	10	284	31.3288	6.45557	1.09618	1.13558	1.13144	1.12107	0.0104956
241027	Ribose-phosphate pyrophosphokinase 2	34.38	8	10	320	34.6129	7.18115	1.1408	1.08221	1.14009	1.12103	0.0247746
258063	VMS1 homolog C1827.04	9.58	6	10	647	71.7709	8.60205	1.09798	1.13229	1.13261	1.12096	0.00890339
257332	Ubiquitin conjugation factor E4	19.94	18	26	1058	119.474	5.8208	1.12255	1.12331	1.11516	1.12034	0.000466622
277159	Mitochondrial escape protein 2	16.39	11	13	787	87.7514	8.74854	1.14223	1.09382	1.12489	1.12031	0.0135759
216829	Cullin-1	48.81	36	54	754	87.0934	6.81494	1.15174	1.11973	1.0891	1.12019	0.0219011
282915	L-rhamnonate dehydratase	1.47	1	1	407	45.1349	6.39209	1.16222	1.07492	1.12297	1.12003	0.0414945
259301	Nuclease S1	50.37	9	22	268	29.6839	5.71924	1.07308	1.13978	1.14693	1.11993	0.0363591
217172	Protein LCHN	5.61	4	5	660	71.9112	5.07178	1.17462	1.05916	1.12598	1.11992	0.0698232
242392	Acyl-protein thioesterase 1	19.21	2	3	229	24.8348	6.03662	0.964413	1.13393	1.26138	1.11991	0.297989
238897	--	2.49	1	1	442	51.3207	9.33447	1.1094	1.05064	1.19928	1.11977	0.10929
226155	Uncharacterized protein C26H5.04	9.05	10	10	1006	110.106	7.48877	1.10937	1.13434	1.11535	1.11969	0.00393225
267473	Inositol-3-phosphate synthase	34.64	15	18	560	60.2151	6.16357	1.12236	1.12494	1.11173	1.11968	0.00113787
217820	RNA polymerase-associated protein C651.09c	17.25	8	10	597	66.5278	9.14404	1.14677	1.10556	1.10661	1.11965	0.0126129
343477	AP-2 complex subunit mu	19.5	8	12	436	49.0484	9.0415	1.13773	1.08042	1.14068	1.11961	0.0258468
356229	--	4.55	1	1	154	15.8285	5.93506	1.27482	1.15602	0.927657	1.1195	0.361565
356513	--	5.06	1	1	178	19.5497	4.67822	1.12956	1.10499	1.12386	1.11947	0.00383855
342631	3-hydroxyanthranilate 3,4-dioxygenase 2	12.72	2	3	173	19.8166	5.40186	1.14777	0.998549	1.212	1.11944	0.199466
238222	Chromatin assembly factor 1 subunit rlf2	3.52	2	2	511	57.123	6.58057	1.07309	1.14331	1.14078	1.11906	0.0353461
221598	N-acyl-phosphatidylethanolamine-hydrolyzing phospholipase D	14.87	4	4	343	38.363	5.69385	1.05571	1.2163	1.08469	1.1189	0.13788
345232	--	1.75	1	2	686	65.3841	4.15771	0.97762	0.912727	1.46616	1.11884	0.566478
357457	--	11.11	1	1	108	11.1186	9.75928	1.17179	1.06387	1.11999	1.11855	0.0626699
336549	Checkpoint protein hus1	6.1	1	4	557	61.9378	8.19189	1.14606	1.0977	1.11169	1.11849	0.0143863
217584	--	1.5	1	1	601	67.4403	6.03662	1.12128	1.1316	1.10234	1.11841	0.00519576
328165	Uncharacterized protein C23D3.17	42.86	3	8	63	7.14964	6.68311	1.07682	1.10239	1.17573	1.11831	0.057425
219068	Protein SERAC1	4.14	1	1	314	35.6914	9.0708	1.12606	1.08617	1.1419	1.11804	0.019161
274156	Histone-lysine N-methyltransferase, H3 lysine-9 specific dim-5	3.94	1	1	254	28.6507	5.46533	1.14416	1.14699	1.06279	1.11798	0.0506388
239809	Maintenance of mitochondrial morphology protein 1	1.91	1	1	418	46.8253	9.26123	1.23639	1.096	1.02144	1.11794	0.202148
276700	ATP-dependent clpX-like chaperone, mitochondrial	2.76	1	1	508	57.0758	6.45557	1.14266	1.10207	1.10892	1.11788	0.0111381
281497	Cyanobacterial phytochrome B	1.55	2	2	1352	149.961	5.92236	1.1458	1.08963	1.11811	1.11785	0.018413
352223	Vegetative incompatibility protein HET-E-1	7.24	1	2	290	33.6781	7.72314	1.09243	1.1069	1.15349	1.11761	0.0236686
253038	Protein sym1	9.75	3	5	236	26.6689	9.65674	1.18785	1.10246	1.06242	1.11758	0.0863335
238964	Ribosome biogenesis protein YTM1	2.1	1	1	476	50.92	6.72705	1.1336	1.09137	1.12738	1.11745	0.0123268
261936	Fumonisin B1 esterase	8.99	4	7	523	57.147	4.36084	1.11041	1.11286	1.12892	1.1174	0.00243511
353779	--	4.49	5	5	1247	138.716	5.18604	1.06998	1.15664	1.12556	1.11739	0.0435925
232066	15-hydroxyprostaglandin dehydrogenase	13.62	3	4	279	30.2374	7.51807	1.13232	1.13846	1.08022	1.117	0.0240435
328163	Stress response protein nst1	5.03	3	3	1073	117.679	5.85889	1.02803	1.20316	1.11949	1.11689	0.147003
249880	V-type proton ATPase subunit H	45.63	20	37	480	53.5471	5.70654	1.10037	1.13228	1.11777	1.1168	0.00618016
321511	Opsin-1	9.43	1	1	159	17.696	6.15088	1.084	1.18486	1.08125	1.1167	0.0757579
220176	Putative esterase YMR210W	2.85	1	1	421	46.9694	7.1665	1.05399	1.1517	1.1434	1.11636	0.0652547
327991	FAD-dependent urate hydroxylase	23.13	7	9	402	44.7747	7.79639	1.11091	1.10899	1.12866	1.11618	0.0028911
272540	Mitochondrial fusion and transport protein UGO1	7.48	3	4	441	47.6237	9.20264	1.20723	1.04292	1.09815	1.1161	0.137991
269967	Protein kinase dsk1	33.65	13	23	523	58.3117	7.23975	1.12399	1.10574	1.11845	1.11606	0.00215803
248263	Universal stress protein A family protein C25B2.10	14.36	4	4	369	41.4389	5.59229	1.1487	1.12064	1.07845	1.11593	0.0296451
357138	Rhomboid protein 2	5.15	1	1	136	14.751	9.72998	1.13645	1.05761	1.1536	1.11589	0.0593197
220805	Protein transport protein SFT2	20.47	4	5	215	23.623	9.36377	1.13114	1.11203	1.1044	1.11586	0.00467801
234509	--	9.03	1	1	155	16.8393	4.62744	1.11603	1.21981	1.01122	1.11569	0.194662
274714	C2H2 finger domain transcription factor crzA	14.03	6	7	556	60.0161	7.84033	1.14382	1.09748	1.10508	1.11546	0.0150942
108218	Nucleoporin NUP133	20.44	21	29	1350	150.388	6.18896	1.12131	1.07757	1.14708	1.11532	0.0295859
217521	Carnitine O-acetyltransferase, mitochondrial	37.86	19	32	597	67.1678	7.66455	1.1432	1.10131	1.10137	1.1153	0.0143317
224122	--	13.75	1	1	160	17.5904	4.61475	1.18939	1.21149	0.944928	1.11527	0.309609
231488	Autophagy-related protein 27	30.3	8	12	330	36.6029	5.04639	1.10119	1.13059	1.11378	1.11519	0.00542116
259127	26S proteasome regulatory subunit rpn11	55.29	12	31	331	36.7016	6.18896	1.12128	1.12046	1.10342	1.11505	0.00254981
240825	Protochlorophyllide reductase A, chloroplastic	21.97	6	9	346	37.0785	8.86572	1.16321	1.08864	1.09304	1.11496	0.0414333
216739	Uncharacterized protein P25A2.03	12.93	6	7	588	66.6639	5.0083	1.14155	1.10858	1.09468	1.11494	0.0143093
334140	Nucleoporin NUP152	12.99	14	23	1224	127.203	8.79248	1.08214	1.10548	1.15711	1.11491	0.0352009
283677	Serum paraoxonase/arylesterase 2	13.42	4	4	365	40.0802	5.59229	1.09994	1.04399	1.20049	1.11481	0.128976
244207	--	19.28	1	2	83	9.00459	7.25439	1.03259	1.26171	1.05003	1.11478	0.259412
329798	Putative transporter C83.11	3.09	1	1	356	38.0638	9.99365	1.15972	1.05468	1.12985	1.11475	0.0668136
215285	--	2.29	5	5	2577	292.972	7.10791	1.11156	1.05832	1.17402	1.11463	0.0755643
219014	Cytochrome b2, mitochondrial	10.06	4	4	487	54.6446	6.06201	1.12312	1.10045	1.1201	1.11456	0.00382894
250669	Cysteine and histidine-rich domain-containing protein	52.65	14	30	321	35.0487	7.76709	1.12261	1.12098	1.09971	1.11444	0.00413042
224250	--	10.96	1	1	146	15.9042	8.01611	1.00695	1.2252	1.11099	1.11438	0.211207
60514	3'(2'),5'-bisphosphate nucleotidase	23.78	6	8	328	35.354	5.36377	1.12486	1.12056	1.09729	1.11424	0.00557186
95065	Probable E3 ubiquitin protein ligase C167.07c	4.73	4	4	1141	129.511	6.17627	1.13792	1.10667	1.0981	1.11423	0.0110331
259901	Protein phosphatase PP2A regulatory subunit B	36.73	15	34	471	52.8732	5.92236	1.10605	1.09819	1.13804	1.11409	0.0112168
281377	Ubiquitin-protein ligase E3A	2.6	2	2	1193	133.666	6.40479	1.1707	1.07643	1.09469	1.11394	0.0585896
276794	5'-3' exoribonuclease 2	8.72	10	12	1055	116.737	6.55127	1.11415	1.09737	1.13026	1.11393	0.00687823
330580	DNA mismatch repair protein msh6	4.62	6	6	1213	134.645	6.3667	1.07947	1.15586	1.10585	1.11373	0.0366679
337077	Pre-mRNA-splicing factor ISY1	16.87	4	6	249	28.0862	5.70654	1.01783	1.21866	1.1045	1.11366	0.189837
223358	--	16.59	3	5	223	24.9576	5.37646	1.14076	1.10529	1.09373	1.11326	0.0152509
48306	Nitronate monooxygenase	11.49	3	5	383	41.1081	6.43018	1.09909	1.01907	1.2216	1.11325	0.194399
109327	Protein SKG3	15.05	12	13	1070	117.531	9.5542	1.11346	1.1085	1.11747	1.11314	0.000525904
330651	--	2.06	1	1	388	43.9153	6.39209	1.13402	1.05897	1.14634	1.11311	0.0536136
334602	60S ribosomal protein L19-B	44.27	10	41	192	22.4093	11.1509	1.02732	1.2205	1.09114	1.11299	0.185098
230815	--	5.59	1	3	340	38.4487	4.95752	1.07112	1.11995	1.14702	1.1127	0.036707
340280	Acyl-CoA synthetase family member 3, mitochondrial	25.68	13	16	588	64.2793	7.44482	1.12899	1.09652	1.11256	1.11269	0.00684969
273250	--	4.43	1	1	158	17.392	9.11475	1.17185	1.04623	1.11981	1.11263	0.0906691
239353	Deubiquitination-protection protein dph1	47.82	13	40	412	42.7757	5.17334	1.05093	1.15011	1.13659	1.11254	0.068406
358460	--	19.85	2	2	136	14.6704	6.88818	1.07354	1.18578	1.07826	1.11253	0.0917244
256968	Serine/threonine-protein kinase nrc-2	13.06	6	7	559	60.9722	8.55811	1.13786	1.09203	1.10736	1.11242	0.0140576
217653	3-methyl-2-oxobutanoate dehydrogenase	9.09	3	4	407	44.3419	5.90967	1.09289	1.11283	1.13105	1.11226	0.00949974
216535	Transmembrane E3 ubiquitin-protein ligase 1	1.01	1	1	890	98.1898	5.64307	1.18226	1.04017	1.11401	1.11214	0.111837
218715	Peptidyl-prolyl isomerase cwc-27	4.35	2	2	529	58.7477	6.96143	1.12735	1.10577	1.1033	1.11214	0.00461081
239636	--	3.16	1	1	316	34.9376	5.38916	1.15885	1.07295	1.10429	1.11203	0.0466958
224139	Transport protein particle subunit trs23	7.19	1	1	153	17.4508	7.98682	1.12898	1.15585	1.05103	1.11196	0.0705803
259099	Condensin complex subunit 2	16.79	11	14	822	90.9844	4.76709	1.10536	1.10485	1.12509	1.11177	0.00353563
222841	Uncharacterized protein C12B10.13	11.84	4	4	245	27.7285	6.45557	1.10111	1.12392	1.1096	1.11154	0.00354208
218592	--	2.07	1	1	484	55.8712	7.82568	1.12097	1.10214	1.1108	1.11131	0.00238208
323708	--	34.69	1	2	49	5.30138	3.70068	1.09145	1.18532	1.05694	1.11124	0.101193
226907	--	1.97	1	1	710	80.1281	6.75635	0.912676	1.20384	1.21701	1.11118	0.379381
251720	Pyridoxal 5'-phosphate synthase subunit PDX1	39.13	12	30	299	31.108	7.26904	1.12806	1.13062	1.07468	1.11112	0.0258877
231111	Golgi apparatus membrane protein tvp38	9.45	1	3	381	39.9038	6.02393	1.0642	1.15639	1.11256	1.11105	0.0529562
238816	Pleiotropic regulator 1	22.98	7	10	483	52.3679	9.17334	1.09364	1.11068	1.12876	1.11103	0.00823551
249199	Dipeptidyl-peptidase 5	24.86	15	25	692	76.1674	6.40479	1.11004	1.12546	1.0975	1.111	0.00526276
227325	ATP-dependent RNA helicase ded1	42.38	26	70	663	69.2652	8.33838	1.09857	1.12599	1.10836	1.11097	0.00518863
231452	Uncharacterized J domain-containing protein C17A3.05c	12.46	6	6	353	38.526	8.76318	1.17866	1.07235	1.08148	1.11083	0.0826922
332332	Structural maintenance of chromosomes protein 4	16.08	22	31	1474	164.871	5.80811	1.11424	1.09113	1.12705	1.11081	0.00887941
335150	--	10.36	3	4	338	35.571	8.88037	1.08753	1.09694	1.14741	1.11063	0.0271008
218648	Folic acid synthesis protein fol1	8.75	3	4	457	49.8849	6.30322	1.13867	1.08399	1.10912	1.11059	0.01981
333307	3-hydroxybenzoate 4-monooxygenase	2.06	1	1	389	43.3789	6.07471	1.15092	1.11335	1.06707	1.11045	0.0449746
227702	Pre-mRNA-splicing factor sap145	23.52	14	16	608	68.2439	4.97021	1.11485	1.13782	1.07798	1.11022	0.024101
216491	Putative SWI/SNF-related matrix-associated actin-dependent regulator of chromatin subfamily A member 3-like 1	4.76	3	6	820	91.4792	7.56201	1.11425	1.12998	1.08585	1.11003	0.0134961
232312	Ribonuclease T2-like	3.16	1	1	285	30.9423	4.60205	1.06321	1.11968	1.14718	1.11002	0.0469371
237491	DNA repair protein rhp7	6.89	3	3	595	66.2911	8.51416	1.04757	1.17199	1.10969	1.10975	0.0924889
105868	Mannitol 2-dehydrogenase	36.45	16	33	502	56.3513	6.17627	1.12132	1.1292	1.07841	1.10965	0.0200971
242152	RNA-binding protein 42	49.75	7	9	201	21.223	9.96436	1.06154	1.15871	1.10833	1.10953	0.0597955
351790	Serine/threonine-protein kinase KIN4	24.19	1	7	310	33.3254	9.45166	1.1523	1.0248	1.15141	1.10951	0.122655
321427	Protein bli-3	6.88	1	1	160	17.1467	6.55127	1.06956	1.17801	1.08023	1.10927	0.0869381
106498	--	7.58	2	2	396	43.0714	5.16064	1.09254	1.13903	1.09589	1.10915	0.0182965
249245	Complex I intermediate-associated protein 30, mitochondrial	19.33	5	5	269	30.4534	8.73389	1.06474	1.12689	1.13526	1.10896	0.0392334
258100	RING finger protein B	9.08	6	7	705	78.2567	5.60498	1.1581	1.07817	1.09047	1.10892	0.0483054
226182	Chromatin structure-remodeling complex subunit rsc9	6.49	6	6	970	108.215	6.31592	1.12736	1.10037	1.09846	1.10873	0.00728536
338882	Deoxyhypusine synthase	19.06	6	6	341	37.8511	6.62451	1.11884	1.05114	1.15618	1.10872	0.0714914
226151	Exportin-T	9.85	9	11	1015	114.325	4.98291	1.09496	1.13763	1.09302	1.10854	0.0175218
278608	Mannosyl-oligosaccharide 1,2-alpha-mannosidase	9.31	6	6	752	84.0557	5.85889	1.05742	1.10507	1.16244	1.10831	0.0703734
351827	Pre-mRNA-processing factor 17	4.44	2	2	541	60.8286	6.18896	1.1228	1.06027	1.1413	1.10812	0.0477538
245028	Putative epoxide hydrolase	46.7	14	26	394	44.5854	5.59229	1.11183	1.1498	1.06244	1.10802	0.0506737
102391	--	30.89	3	4	123	12.6465	9.78857	1.02461	1.21499	1.08357	1.10772	0.19566
248837	--	6.87	3	4	393	43.5871	6.68311	1.10377	1.08002	1.13882	1.10754	0.0243061
244321	Altered inheritance of mitochondria protein 1	15.07	1	1	73	8.06306	7.12256	1.07859	1.11965	1.12432	1.10752	0.0177666
227595	ATP-dependent RNA helicase DBP9	1.38	1	1	580	65.6016	9.45166	1.18346	1.02625	1.11283	1.10752	0.141736
220115	Probable eukaryotic translation initiation factor 5	33.72	13	22	433	48.3148	5.52881	1.12394	1.09007	1.10849	1.1075	0.00819035
282983	Delta(3,5)-Delta(2,4)-dienoyl-CoA isomerase, mitochondrial	3.61	1	1	249	26.8058	6.23975	1.22837	1.07102	1.02258	1.10732	0.226166
217064	Protein BZZ1	6.8	4	5	706	77.0789	7.45947	1.03994	1.1638	1.1178	1.10718	0.0974038
102177	L-amino acid amidase	14.81	5	9	324	35.3757	5.79541	1.08707	1.15955	1.07425	1.10696	0.0564732
72620	Uncharacterized protein C24H6.02c	8.04	1	1	112	12.4721	8.22119	1.17315	1.12211	1.02553	1.10693	0.132145
340128	Synembryn-like protein C3E7.04c	27.83	11	12	460	51.4727	5.14795	1.09586	1.11186	1.11256	1.10676	0.00259986
267313	--	59.65	12	46	285	31.2027	5.85889	1.11262	1.11197	1.0956	1.10673	0.00271093
249183	Vacuolar protein sorting-associated protein 26	19.94	6	11	321	37.2202	6.66846	1.09799	1.10945	1.11218	1.10654	0.00166131
351266	--	1.24	2	2	1452	155.558	5.79541	1.15514	1.10154	1.06291	1.10653	0.0576254
235303	THO complex subunit 2	5.27	13	13	2334	259.682	8.99756	1.10861	1.13166	1.07926	1.10651	0.0196707
108141	ZZ-type zinc finger-containing protein P35G2.11c	8.18	8	9	831	91.7275	5.21143	1.15913	1.07612	1.08404	1.10643	0.0565662
239499	3-hydroxybenzoate 6-hydroxylase 1	2.12	1	1	424	46.7415	6.80029	1.16105	1.12027	1.03795	1.10643	0.0988611
356437	UPF0659 protein C216.03	40.54	8	10	259	27.7343	5.69385	1.07892	1.1301	1.10972	1.10625	0.0190431
251821	Vacuolar protein sorting-associated protein 9a	17.21	9	9	645	71.1158	6.20166	1.10358	1.12733	1.08762	1.10618	0.0116035
233141	Probable FAD synthase	18.96	4	6	269	29.9792	6.02393	1.06867	1.18204	1.06779	1.10617	0.107486
328989	--	28.92	3	10	166	17.9522	5.85889	1.06826	1.16583	1.08366	1.10592	0.0729209
245922	Dual specificity protein kinase YAK1	18.31	17	20	874	96.5442	9.33447	1.13521	1.09373	1.08795	1.10563	0.0192797
107594	Protein PAL1	21.9	7	13	420	44.9815	9.75928	1.07194	1.16421	1.08071	1.10562	0.0695267
330374	Malic acid transport protein	9.24	4	6	422	47.0887	7.76709	1.10105	1.1117	1.10354	1.10543	0.000928551
219767	RNA polymerase II-associated protein rba50	9.3	2	2	398	43.4727	5.73193	1.10006	1.1193	1.09686	1.10541	0.00439342
246441	Palmitoyltransferase AKR1	6.53	4	5	704	77.4166	7.38623	1.05195	1.08913	1.17506	1.10538	0.101741
108145	--	5.11	2	2	587	63.7774	4.61475	1.16338	1.05686	1.09527	1.10517	0.0776261
258123	Uncharacterized solute carrier family 35 member C320.08	8.01	2	2	387	43.1291	8.74854	1.1769	0.978952	1.15965	1.10517	0.238536
341601	E3 ubiquitin-protein ligase PIB1	2.29	1	2	612	66.0347	6.68311	1.12403	1.08578	1.10497	1.10493	0.0108954
228983	--	3.43	2	2	496	55.6203	7.95752	1.11498	1.07457	1.12459	1.10471	0.0207591
234603	DNA-directed RNA polymerases I and III subunit RPAC2	23.53	2	2	119	13.4075	4.55127	1.04315	1.19289	1.07749	1.10451	0.147369
100900	Proteasome subunit alpha type-4	59.45	15	38	254	27.8015	8.83643	1.10196	1.10359	1.10751	1.10435	0.000249687
102890	--	21.62	4	10	222	25.0329	6.63916	1.11756	1.17718	1.01807	1.10427	0.153701
226294	AB hydrolase superfamily protein C4A8.06c	2.45	2	4	816	90.6049	7.1665	1.13159	1.04812	1.13297	1.10423	0.0654242
358544	(S)-coclaurine N-methyltransferase	10.1	3	3	297	34.0497	6.23975	1.16629	1.04774	1.09852	1.10419	0.0936286
108125	Pre-mRNA-splicing factor srp1	18.72	5	13	203	24.2328	9.43701	1.08963	1.12585	1.09697	1.10415	0.0110844
219354	Probable guanine deaminase	7.22	3	5	485	52.4422	5.59229	1.13839	1.08708	1.08563	1.1037	0.026864
256757	Peroxiredoxin-1	62.56	13	86	195	21.7032	5.2749	1.10861	1.11981	1.08255	1.10366	0.0111503
259982	Glucose-6-phosphate 1-epimerase	73.6	19	44	322	34.4275	5.07178	1.09034	1.11882	1.10141	1.10352	0.00634915
220500	Uncharacterized protein C63.05	4.67	2	2	364	41.2596	4.97021	1.15268	1.11886	1.03845	1.10333	0.0927778
223073	--	6.02	1	1	216	24.0051	5.57959	1.01842	1.12364	1.16776	1.10327	0.144998
219617	26S protease regulatory subunit 6A	53.33	20	51	465	51.7687	5.18604	1.13306	1.11407	1.06228	1.10313	0.0395773
103555	Dual specificity protein kinase FUZ7	31.37	11	19	424	47.0869	6.69775	1.12185	1.11044	1.07692	1.10307	0.0166828
251785	U2 small nuclear ribonucleoprotein A'	11.38	3	3	246	27.7539	8.57275	1.10918	1.13195	1.06797	1.10303	0.0314657
216993	Vacuolar protein sorting-associated protein 27	17.38	10	13	702	76.7196	6.12549	1.08441	1.12651	1.09711	1.10268	0.0144298
337140	Phospholipid-transporting ATPase DNF1	7.21	10	11	1497	169.273	6.25244	1.14064	1.07249	1.09487	1.10267	0.0361056
249749	Polarized growth protein rax2	3.7	4	5	1134	116.978	4.42432	1.10568	1.02838	1.17347	1.10251	0.134308
343048	Mitotic spindle checkpoint component mad2	10.83	2	3	240	26.6205	6.25244	1.10658	1.08181	1.11906	1.10248	0.0112158
260527	Probable glutamate carboxypeptidase ARB_02390	21.25	11	15	781	86.8096	5.37646	1.11713	1.09476	1.09359	1.10183	0.00560735
225977	DNA mismatch repair protein MSH3	1.06	1	1	1130	123.516	6.99072	1.17418	1.12717	1.00334	1.10156	0.184413
222875	Ubiquitin carboxyl-terminal hydrolase isozyme L3	32.48	7	12	234	25.615	5.07178	1.08885	1.09754	1.11814	1.10151	0.00724174
219125	Phenylacetaldehyde dehydrogenase	15.43	5	6	499	52.8735	6.55127	1.12726	1.10263	1.07412	1.10134	0.022192
333336	Carboxy-cis,cis-muconate cyclase	2.18	1	1	367	41.08	6.12549	1.13627	1.09706	1.07051	1.10128	0.0337785
246522	Transcription initiation factor TFIID subunit 6	23.46	9	12	456	50.281	5.21143	1.12925	1.07867	1.09585	1.10126	0.0208346
278329	1-phosphatidylinositol 3-phosphate 5-kinase fab1	1.92	3	4	2349	261.559	7.02002	1.08552	1.10995	1.10799	1.10115	0.00594667
220410	Uncharacterized protein C13E7.08c	18.47	7	12	406	45.8429	4.80518	1.08241	1.10313	1.11775	1.1011	0.010131
233129	--	10.83	3	4	240	26.1123	5.96045	1.11126	1.06059	1.13141	1.10109	0.0407995
252126	DNA-directed RNA polymerases II and V subunit 8A	37.84	4	7	148	16.2573	4.99561	1.08978	1.10112	1.11214	1.10102	0.00405631
323507	--	9.04	1	1	177	19.6774	9.5542	1.13195	1.10712	1.06361	1.10089	0.0370304
218656	Oxysterol-binding protein-like protein OBPa	47.25	18	32	527	58.6723	6.0874	1.13524	1.07804	1.08938	1.10089	0.0287541
263868	Flavin carrier protein 2	6.71	3	3	700	75.9925	5.99854	1.06947	1.05511	1.17783	1.1008	0.12136
216928	Thiamine repressible genes regulatory protein thi1	2.78	2	2	720	79.8814	7.32764	1.17456	0.992233	1.13531	1.1007	0.210766
281400	--	2.29	1	1	480	52.1116	5.23682	0.985056	1.21609	1.10083	1.10066	0.270291
221667	Cyclin-dependent kinase 1	46.13	11	27	310	35.1539	6.65381	1.11987	1.08491	1.09653	1.10044	0.0103147
346145	Alkali-sensitive linkage protein 1	4.13	2	4	387	39.4963	4.38623	1.07813	1.13308	1.08984	1.10035	0.0266245
106743	Carbamoyl-phosphate synthase arginine-specific small chain	4.56	2	2	417	45.5668	6.31592	1.05996	1.16012	1.08039	1.10016	0.0818144
102973	Dehydrodolichyl diphosphate syntase complex subunit NUS1	4.86	2	2	329	37.5486	7.91357	1.06465	1.16163	1.07371	1.1	0.0838047
323246	--	32.41	3	7	108	11.2719	6.94678	1.10405	1.09254	1.10318	1.09992	0.00136855
66490	Rho-GTPase-activating protein 5	10.3	6	9	728	79.2073	9.02686	1.12963	1.05716	1.1128	1.09986	0.0448694
268028	Adenosine deaminase CECR1-A	24.31	9	12	576	66.0608	5.60498	1.1228	1.10082	1.07513	1.09958	0.0186049
61611	NADPH:adrenodoxin oxidoreductase, mitochondrial	4.15	2	2	458	49.213	6.11279	1.07216	1.10474	1.12169	1.09953	0.0206626
215937	ABC1 family protein YPL109C, mitochondrial	1.25	1	1	638	72.4365	6.41748	1.11461	1.11531	1.0686	1.09951	0.0232835
274476	Amidase 1	3.03	1	1	297	33.6676	5.30029	1.13732	1.11745	1.04276	1.09918	0.0749021
350215	Putative sulfate transporter YPR003C	3.77	2	3	769	82.8138	9.1001	1.17306	1.04878	1.07569	1.09917	0.119469
218833	Protein FMP42	2.98	1	2	504	55.4409	5.35107	0.920285	1.26349	1.11361	1.09913	0.423466
340675	Probable 6-phosphogluconolactonase ARB_02015	9.43	2	2	350	38.002	4.90674	1.07533	1.12608	1.09563	1.09901	0.0214766
239653	--	7.54	2	2	451	49.5174	5.8208	1.01743	1.18353	1.09598	1.09898	0.175166
272133	Transcription-associated protein 1	5.09	18	20	3773	429.775	7.09326	1.09082	1.1084	1.09749	1.0989	0.00267045
323140	--	9.64	1	1	83	9.49784	5.97314	1.03226	1.15376	1.11049	1.09884	0.108708
242068	DNA-directed RNA polymerase III subunit rpc5	4.49	1	1	267	29.0176	6.81494	1.13325	1.03678	1.12616	1.09873	0.086255
215565	Uncharacterized protein C11D3.15	5.49	6	6	1366	149.17	5.73193	1.10037	1.06828	1.12745	1.0987	0.0287297
258073	BUB3-interacting and GLEBS motif-containing protein ZNF207	32.11	11	13	355	38.6094	9.20264	1.11163	1.12727	1.05694	1.09861	0.0436953
221542	Protein transport protein yip1	5.05	2	2	317	33.125	6.354	1.09609	1.03672	1.16269	1.0985	0.113653
215684	Pre-mRNA-splicing factor rse1	27.28	28	41	1206	133.304	5.22412	1.11815	1.08581	1.09077	1.09824	0.0103155
331872	Putative NADP-dependent oxidoreductase YfmJ	22.29	7	9	341	36.7054	9.29053	1.07105	1.09461	1.12888	1.09818	0.0280186
253644	Anthranilate phosphoribosyltransferase	4.41	2	2	408	44.3715	6.25244	1.11018	1.10177	1.0824	1.09812	0.00695581
274415	CTD kinase subunit beta	4.36	1	2	321	37.3678	7.00537	1.17485	0.657925	1.46111	1.09796	0.717298
347535	Uncharacterized membrane protein C6F6.13c	8.47	9	10	1145	124.635	4.88135	1.0905	1.10532	1.09773	1.09785	0.0019062
222235	Proteasome subunit beta type-5	34.51	9	16	284	31.1275	6.30322	1.0751	1.13015	1.08815	1.0978	0.0276383
235780	Cohesin subunit psc3	10.54	10	12	1167	130.53	5.10986	1.1149	1.10531	1.07252	1.09758	0.016849
283507	60S ribosomal protein L16	50.5	13	32	202	23.1066	10.3599	1.06692	1.17676	1.04859	1.09742	0.13533
275074	Transport protein particle subunit trs85-2	3.05	2	2	689	76.5759	7.21045	1.09087	1.04036	1.16081	1.09734	0.1082
273141	Glutamyl-tRNA(Gln) amidotransferase subunit A, mitochondrial	5.88	2	2	425	44.8408	5.97314	1.02515	1.10081	1.16582	1.09726	0.139111
222941	Nudix hydrolase 14, chloroplastic	8.1	1	1	247	27.382	5.05908	1.13603	1.12379	1.03142	1.09708	0.0988412
20096	Putative RNA polymerase II transcriptional coactivator	25.19	2	4	135	14.6094	9.0415	1.10744	1.05088	1.13271	1.09701	0.0569254
264613	--	2.44	1	3	656	74.2061	5.69385	1.00878	1.16325	1.11798	1.09667	0.169504
232695	--	8.71	2	4	287	32.5189	4.98291	1.08611	1.1769	1.02676	1.09659	0.157417
29312	Vacuolar protein-sorting-associated protein 25	6.34	1	1	205	22.9916	7.04932	1.12515	1.04935	1.11417	1.09622	0.0554257
328103	Ubiquitin-conjugating enzyme E2 15	6.67	1	1	135	15.0964	5.03369	1.1344	1.09492	1.05934	1.09622	0.047194
245224	Nucleolar protein 16	3.35	1	2	209	23.392	9.75928	1.13476	1.11557	1.03827	1.0962	0.0825036
222091	--	3.22	1	1	311	34.689	7.10791	1.07289	1.13607	1.07963	1.09619	0.0407374
223186	Vesicle transport v-SNARE protein vti1	46.46	8	12	226	25.4133	7.59131	1.06531	1.11204	1.11104	1.09613	0.0247566
215373	Kinesin-like protein unc-104	2.84	4	6	1797	198.507	5.85889	1.00369	1.1675	1.1168	1.096	0.185883
352823	pH-response regulator protein palC	30.98	11	14	510	55.0012	7.85498	1.12154	1.08516	1.08093	1.09588	0.0175949
323506	Uncharacterized protein C4H3.03c	6.58	3	3	517	59.3368	5.79541	1.09686	1.03608	1.15434	1.09576	0.107095
236943	Poly	38.43	19	32	661	72.1409	6.66846	1.10453	1.08999	1.09152	1.09535	0.00233159
217350	Serine/threonine-protein kinase srk1	26.6	14	19	579	64.3907	6.81494	1.11796	1.09871	1.06932	1.09533	0.0213107
348785	Probable vacuolar protein sorting-associated protein 16 homolog	13.95	12	12	810	91.0086	5.92236	1.13142	1.08992	1.06404	1.09512	0.0400224
338200	Vacuolar protein sorting-associated protein 17	30.17	14	23	600	65.9089	6.34131	1.08442	1.10573	1.09483	1.095	0.00416781
22037	Pre-rRNA-processing protein rix1	7.56	4	4	661	72.4599	6.21436	1.09784	1.11143	1.07526	1.09484	0.0121479
338670	Protein stu-1	4.79	5	5	1106	120.062	9.15869	1.13453	1.05399	1.09531	1.09461	0.0554382
353668	--	1.88	1	1	479	53.0961	8.04541	1.12832	1.06307	1.09213	1.09451	0.0376547
275203	Origin recognition complex subunit 4	2.42	1	1	495	54.5891	5.90967	1.07157	1.09861	1.11316	1.09445	0.0162377
222020	Transcription elongation factor S-II	29.29	11	17	297	32.99	9.24658	1.09819	1.11057	1.07342	1.09406	0.0132198
227927	--	4.04	2	2	495	55.8265	5.21143	1.09398	1.09461	1.09325	1.09395	1.76e-05
333234	Uncharacterized GTP-binding protein C428.15	33.98	12	15	415	45.0513	6.88818	1.08559	1.10012	1.09505	1.09359	0.00206161
339344	Probable translation initiation factor eIF-2B subunit gamma	29.8	12	15	537	58.3544	5.35107	1.09522	1.11588	1.06928	1.09346	0.0201813
334716	Geranylgeranyl pyrophosphate synthase	23.53	7	8	340	38.1404	5.87158	1.05323	1.12612	1.10082	1.09339	0.0485663
105234	--	26.45	8	13	431	49.4032	5.17334	1.0867	1.09355	1.09973	1.09332	0.00162272
240897	Putative tyrosine-protein phosphatase H16_A0669	40.21	8	9	286	31.5583	5.42725	1.08228	1.09484	1.1027	1.09327	0.00403877
267778	Beta-apo-4'-carotenal oxygenase	13.6	6	9	500	55.7836	8.49951	1.10226	1.1056	1.07122	1.09303	0.0135668
244536	Putative mannose 6-phosphate receptor-like protein C530.09c	10.03	3	4	339	36.7849	7.04932	1.0485	1.09096	1.13943	1.09296	0.0713945
335717	Elongation of very long chain fatty acids protein 3	9.19	3	3	457	49.9067	9.49561	1.10058	1.06034	1.11702	1.09265	0.0314735
96602	Serine/threonine-protein kinase ppk30	9.22	9	10	1030	112.104	9.18799	1.06354	1.11203	1.10204	1.09253	0.0245862
331373	Exosome complex component rrp43	7.71	3	3	350	38.2952	5.021	1.13071	1.07665	1.07013	1.0925	0.0404831
352166	Probable 26S proteasome regulatory subunit rpn3	38.16	16	35	587	65.1685	6.12549	1.09826	1.14836	1.03086	1.09249	0.112952
325458	Peptidyl-prolyl cis-trans isomerase-like 2	4.45	2	2	539	59.3251	8.14795	1.03352	1.14036	1.10265	1.09218	0.0984603
327909	Sporulation-specific protein spo7	8.49	4	11	424	47.0643	10.3159	1.0994	1.03918	1.13794	1.09217	0.085004
327989	--	26.84	7	10	339	36.6014	4.67822	1.06594	1.0849	1.1255	1.09211	0.0345034
280369	--	13.37	6	12	718	77.8056	6.52197	1.06138	1.17963	1.03445	1.09182	0.175671
215294	Peroxide stress-activated histidine kinase mak3	5.34	12	14	2303	254.703	6.15088	1.09502	1.04076	1.13965	1.09181	0.0848382
271609	Pre-mRNA-processing-splicing factor 8	15.63	33	40	2309	268.307	8.71924	1.09008	1.10162	1.08359	1.09176	0.00328472
233715	Cysteine dioxygenase	31.96	5	6	194	21.7387	6.43018	1.08985	1.09311	1.0923	1.09175	0.00011426
331116	--	16.17	2	2	167	18.4708	9.12939	1.12383	1.06244	1.08891	1.09173	0.0355669
227479	Sorting nexin-41	22.3	10	14	610	68.3132	5.74463	1.14702	1.08578	1.04213	1.09164	0.0947928
107874	PWWP domain-containing protein2	48.63	23	56	586	63.6499	5.2876	1.04911	1.13009	1.09568	1.09163	0.0597698
345942	--	2.14	1	1	1214	130.007	4.84326	0.984754	1.17153	1.11849	1.09159	0.241073
222370	Replication termination factor 2	5.59	2	2	286	31.7612	8.11865	1.06427	1.13318	1.07703	1.09149	0.04957
265480	Thymidylate synthase	15.09	5	6	318	35.734	7.06396	1.11472	1.09518	1.06433	1.09141	0.0247988
343202	OTU domain-containing protein 2	6.8	2	3	294	32.8188	7.62061	1.14212	1.11525	1.01681	1.09139	0.138499
335605	Uncharacterized protein C56F8.02	13.16	19	32	1801	198.563	6.07471	1.09612	1.06108	1.1168	1.09133	0.0302724
235635	Uncharacterized PH domain-containing protein C19A8.02	8.95	11	13	1319	146.679	7.85498	1.06285	1.07985	1.13071	1.09114	0.0465616
280897	NEDD8-specific protease 2	7.95	1	2	176	19.7681	9.14404	1.13882	1.06294	1.07152	1.09109	0.0628992
223831	ADP-ribosylation factor-like protein 1	16.09	2	3	174	19.1528	4.90674	1.1211	1.0243	1.12764	1.09101	0.11248
332747	Granaticin polyketide synthase putative ketoacyl reductase 2	12.78	3	3	266	28.5617	7.13721	1.08157	1.06468	1.12623	1.09083	0.0385143
219169	Probable 26S proteasome regulatory subunit rpn7	42.57	18	35	491	54.3883	6.82959	1.0961	1.08942	1.08688	1.0908	0.000916234
109171	tRNA-specific adenosine deaminase 2	6.14	4	4	635	67.7701	5.64307	1.07375	1.09317	1.10528	1.09073	0.0100884
218710	Tyrosyl-DNA phosphodiesterase 1	1.52	1	1	525	58.732	9.12939	1.12295	1.06778	1.08097	1.09057	0.0321119
109528	Probable 3-mercaptopyruvate sulfurtransferase	47.88	14	22	307	34.2874	6.02393	1.09903	1.12107	1.05151	1.09054	0.0477402
226664	Cytosolic phospholipase A2 delta	4.93	4	5	771	85.996	5.13525	1.11576	1.07639	1.07917	1.09044	0.0191111
260831	--	3.49	1	1	344	38.1579	8.82178	1.13093	1.09922	1.03991	1.09002	0.0777045
217041	Uncharacterized oxidoreductase YgbJ	6.87	2	2	451	47.2812	6.44287	1.0878	1.10964	1.07186	1.08977	0.0145536
352414	--	2.98	1	1	235	26.7821	4.44971	1.03284	1.05783	1.17779	1.08949	0.183449
222378	Pre-mRNA-splicing factor 38	16.12	3	4	242	28.1413	5.61768	1.0873	1.16284	1.0182	1.08945	0.165544
256174	3-hydroxy-3-isohexenylglutaryl-CoA/hydroxy-methylglutaryl-CoA lyase	19.35	4	7	372	39.3378	5.24951	1.0885	1.09373	1.08574	1.08932	0.000686114
240648	--	30.34	8	11	323	34.9149	7.51807	1.08695	1.14895	1.03171	1.0892	0.118938
226279	Probable beta-glucosidase E	14.75	11	12	895	97.1363	5.47803	1.08953	1.10317	1.07489	1.08919	0.00827883
268048	ATP-dependent RNA helicase DBP5	50	16	28	458	50.0619	6.17627	1.0848	1.09077	1.09181	1.08913	0.000601034
245507	Branchpoint-bridging protein	25.85	11	14	588	63.647	8.30908	1.10371	1.0752	1.08842	1.08911	0.00843488
351728	Transcription factor SFP1	5.65	6	6	903	95.3858	5.87158	1.11009	1.09564	1.06152	1.08908	0.0251458
226235	Meiotically up-regulated gene 60 protein	14.1	12	15	943	105.148	6.53662	1.05009	1.11298	1.10359	1.08889	0.0452905
326513	Phenol 2-monooxygenase	13.86	8	10	707	78.1771	5.24951	1.11825	1.0705	1.07768	1.08881	0.0268839
279751	Metacaspase-1B	8.13	1	1	246	27.0116	6.15088	0.941279	1.25922	1.0653	1.0886	0.439301
20787	Phospholipase D1	1.49	3	3	1607	181.139	7.35693	1.10542	1.058	1.10071	1.08804	0.0281212
263970	Lid2 complex component snt2	5.9	11	13	1711	188.008	8.93896	1.13008	1.02863	1.10524	1.08799	0.102263
328226	E3 ubiquitin-protein ligase listerin	6.81	10	11	1527	169.378	5.68115	1.06209	1.10178	1.09977	1.08788	0.0209022
261117	Protein ELYS	12.16	3	3	255	28.7526	6.91748	1.11417	1.06757	1.08188	1.08788	0.0237265
255964	Peptidyl-prolyl cis-trans isomerase E	16.34	2	2	153	16.4781	4.52588	1.06295	1.11872	1.08184	1.08784	0.0330392
238821	Potassium/sodium hyperpolarization-activated cyclic nucleotide-gated channel 2	1.65	1	1	486	52.9355	8.57275	0.976414	1.02427	1.26278	1.08782	0.425891
245360	COP9 signalosome complex subunit 5	26.61	8	9	342	38.1242	6.3667	1.09636	1.07876	1.08825	1.08779	0.00334058
233812	Uncharacterized protein YgeA	7.84	1	1	204	21.5352	5.98584	1.06159	1.15513	1.04643	1.08772	0.12305
101113	AP-1 complex subunit mu-1	40.4	16	21	448	50.6781	7.15186	1.09488	1.08688	1.08053	1.08743	0.00224792
242228	--	4.26	1	1	188	20.7768	5.96045	1.15748	0.981192	1.12343	1.08737	0.247029
223288	--	19.8	3	4	197	22.4796	6.80029	1.08201	1.10012	1.0794	1.08717	0.00553676
334659	U1 small nuclear ribonucleoprotein C	16.81	2	3	119	12.0259	9.70068	1.04695	1.13812	1.07624	1.0871	0.0834468
281294	Arylsulfatase	25.59	13	16	508	57.4645	5.30029	1.09735	1.0471	1.11622	1.08689	0.0520007
218469	DnaJ homolog subfamily C member 21	9.43	4	4	530	59.6996	4.91943	1.03498	1.15616	1.06923	1.08679	0.137868
350669	--	5.97	4	4	854	93.1949	7.81104	1.03607	1.12484	1.09883	1.08658	0.0814628
330198	U4/U6.U5 tri-snRNP-associated protein snu66	12.65	7	12	656	73.7607	5.49072	1.08371	1.14288	1.03313	1.08657	0.112083
235884	Probable exocyst complex component sec8	10.27	9	11	1071	119.868	5.36377	1.17138	1.03886	1.04936	1.08654	0.178865
333003	Probable proteasome subunit alpha type-7	42.61	11	24	291	31.7589	5.32568	1.08688	1.07846	1.09399	1.08644	0.00268449
219205	Protein OS-9 homolog	13.03	4	4	491	54.1848	5.04639	1.10404	1.11987	1.0349	1.08627	0.0805491
235040	Small nuclear ribonucleoprotein E	8.6	1	1	93	10.5597	9.31982	1.09017	1.11102	1.05736	1.08618	0.0313036
329801	RuvB-like helicase 2	42.65	18	28	476	51.5666	5.87158	1.10514	1.083	1.07	1.08605	0.0139183
244791	Transmembrane GTPase fzo1	4.49	4	4	914	100.649	6.07471	1.12558	1.05172	1.08057	1.08596	0.0572051
228713	Quinate permease	3.46	1	1	462	50.4934	8.83643	0.877385	1.22184	1.15849	1.0859	0.502274
326615	Protein MAK16	9.54	2	3	325	38.0328	4.81787	1.12146	1.04701	1.08817	1.08554	0.057909
222588	4-hydroxy-2-oxo-heptane-1,7-dioate aldolase	3.37	1	1	267	28.6265	5.98584	1.11717	1.092	1.04709	1.08542	0.0530336
14287	GCR1-dependent translation factor 1	19.31	6	7	466	49.9225	6.75635	1.12917	1.052	1.07504	1.0854	0.06482
340193	--	8.88	4	5	653	65.9233	4.39893	1.09691	1.0558	1.10298	1.08523	0.0289262
106616	--	16.89	15	18	1190	126.823	9.02686	1.06577	1.09725	1.09242	1.08515	0.0129624
102269	--	61.54	12	37	234	26.5257	5.96045	1.10743	1.07252	1.07546	1.08513	0.0168112
218983	Nucleoporin AMO1	5.35	3	5	486	50.8914	6.56592	1.08564	1.0955	1.07408	1.08507	0.00524913
38745	ATP-dependent RNA helicase dbp6	2.52	2	3	675	74.3067	7.31299	1.14834	1.03305	1.07371	1.08503	0.128043
239590	--	13.35	4	6	367	40.2407	6.16357	1.0965	1.05754	1.101	1.08501	0.0253472
330957	DNA repair protein RAD50	14.71	18	20	1237	141	6.45557	1.10972	1.06199	1.08308	1.08493	0.0254367
239461	Sphingoid long chain base kinase 5	19.31	6	6	404	44.2887	7.84033	1.07569	1.09641	1.08263	1.08491	0.00510429
238804	Delta(24)-sterol reductase	8.55	4	5	503	56.6777	8.36768	1.09165	1.06684	1.09621	1.0849	0.0113588
240852	Cytosolic Fe-S cluster assembly factor NBP35	2.06	1	1	340	36.028	4.97021	1.11461	1.02268	1.11701	1.08477	0.112081
332789	Alpha-mannosidase	27.43	26	53	1079	122.308	6.04932	1.10747	1.06918	1.0773	1.08465	0.0184189
272963	Initiation-specific alpha-1,6-mannosyltransferase	13.31	4	5	293	33.1668	6.3667	1.13293	1.02224	1.0986	1.08459	0.122643
34253	--	44.95	5	7	109	12.3991	5.50342	1.1041	1.1157	1.03303	1.08427	0.082548
346986	White collar 1 protein	1	1	1	998	108.015	7.50342	1.13906	1.01302	1.10007	1.08405	0.152713
219021	Phenylalanine--tRNA ligase, mitochondrial	14.83	6	6	445	50.4322	6.32861	1.07611	1.0755	1.10016	1.08392	0.00923019
292617	Probable T-complex protein 1 subunit eta	10.13	3	3	227	24.8586	5.78271	0.977661	1.12901	1.14427	1.08365	0.256349
244962	Probable proteasome subunit alpha type-6	66.28	16	46	261	28.6134	5.5415	1.08771	1.07617	1.08689	1.08359	0.00197236
235749	Serine/threonine-protein kinase ssp1	16.84	17	19	1176	131.325	6.20166	1.06758	1.08744	1.09534	1.08345	0.00965589
220353	Bromodomain-containing protein 4	7.12	3	3	393	44.2	5.43994	1.05494	1.08282	1.11155	1.0831	0.0365543
238143	Dol-P-Man:Man(7)GlcNAc(2)-PP-Dol alpha-1,6-mannosyltransferase	4.11	2	2	560	61.6014	9.12939	1.06301	1.08829	1.09759	1.08296	0.0151575
215738	Actin cytoskeleton-regulatory complex protein sla1	20.96	17	25	1150	123.443	5.42725	1.06256	1.09408	1.092	1.08288	0.0147504
78867	Ankyrin repeat protein nuc-2	10.82	15	29	1405	154.423	5.5542	1.0255	1.15039	1.07211	1.08267	0.151362
217399	Heat shock 70 kDa protein 12A	7.79	4	4	629	69.6621	5.80811	1.0759	1.08369	1.08762	1.0824	0.00174063
217033	Inner nuclear membrane protein HEH2	38.31	19	24	710	78.7289	7.00537	1.10585	1.06641	1.07485	1.08237	0.020545
334320	--	11.08	17	32	2509	263.241	4.17041	1.0551	1.1334	1.0586	1.08237	0.0841574
242937	Chromatin-remodeling complex subunit ies6	37.74	6	7	212	21.9292	9.62744	1.05162	1.1384	1.05697	1.08233	0.0992825
354525	--	5.77	1	1	208	22.966	4.60205	1.14281	1.02852	1.07564	1.08232	0.131088
226353	Probable nucleolar complex protein 14	3.26	3	3	921	104.477	6.20166	0.970779	1.14258	1.13356	1.08231	0.278322
267363	--	52.1	14	29	309	34.8513	5.18604	1.07727	1.10507	1.06408	1.08214	0.0209559
328722	Putative ATP-dependent helicase IRC3	3	2	2	533	59.3777	8.82178	1.11243	1.10636	1.027	1.08193	0.0967264
240081	mRNA-capping enzyme subunit alpha	19	6	6	379	44.2202	5.45264	1.1101	1.03854	1.09689	1.08184	0.065192
102078	Phosphatidylglycerol/phosphatidylinositol transfer protein	42.86	8	18	147	15.6834	5.14795	1.08486	1.07497	1.08556	1.0818	0.00174237
266696	--	24.2	10	14	566	61.0412	5.05908	1.06928	1.1029	1.07307	1.08175	0.0164948
331685	Vacuolar amino acid transporter 3	7.66	3	7	627	67.9341	6.99072	1.10327	1.04708	1.0949	1.08175	0.0429118
216265	Heat shock protein hsp98	37.79	29	65	921	102.328	5.80811	1.12779	1.10209	1.01533	1.08174	0.13821
333584	Uncharacterized RING finger protein YBR062C	55.2	9	15	221	25.0793	5.04639	1.0922	1.14133	1.01135	1.08163	0.164042
353063	Cytochrome c oxidase assembly protein COX15	8.92	3	4	471	51.4399	10.1255	1.09672	1.04581	1.10234	1.08163	0.0452508
341202	Ribosomal RNA-processing protein 14	4.68	2	3	556	61.6157	8.79248	0.983104	1.15479	1.10696	1.08162	0.251659
233314	Sedoheptulose 1,7-bisphosphatase	17.06	4	4	252	27.9051	6.29053	1.05595	1.08878	1.09972	1.08148	0.0250746
277252	Actin-related protein 10	1.82	1	1	548	59.4642	5.85889	1.12488	0.97623	1.1426	1.08123	0.263459
278289	--	2.83	1	1	565	62.5508	5.56689	1.12193	0.986309	1.13503	1.08109	0.230185
325163	NAD(P)H-hydrate epimerase	10.12	7	7	781	84.6014	8.55811	1.07953	1.08149	1.08195	1.08099	8.39e-05
269264	Palmitoyltransferase PFA3	9.9	5	11	596	65.5393	7.59131	1.02628	1.02143	1.19482	1.08084	0.291916
107212	--	16.31	3	6	233	23.319	7.29834	1.05617	1.07466	1.11121	1.08068	0.0379015
108592	--	54.31	9	33	232	25.0286	4.80518	1.06242	1.11204	1.06731	1.08059	0.0363062
325300	Gelsolin	17.55	22	26	1561	166.985	9.62744	1.07932	1.06442	1.09776	1.0805	0.0140439
326695	--	41.23	9	14	308	33.3148	5.31299	1.08895	1.09442	1.05783	1.0804	0.019504
98346	UPF0743 protein C215.06c	3.57	2	2	420	46.5098	9.51025	1.12051	1.02493	1.09558	1.08034	0.106945
343202	OTU domain-containing protein 6B	5.18	1	2	193	22.2275	9.39307	1.10503	1.07769	1.05791	1.08021	0.0277995
252530	Putative dioxygenase C576.01c	20.7	6	8	343	38.3536	6.52197	1.09551	1.08831	1.05676	1.08019	0.0213259
215913	Imitation switch two complex protein 1	9.37	9	10	1003	115.372	5.49072	1.06739	1.11202	1.06114	1.08018	0.0376741
107477	Annexin A6	11.19	6	8	670	76.017	8.85107	1.11202	1.04782	1.0805	1.08011	0.0495738
333982	Zinc finger protein 830	12.15	4	4	461	48.3908	5.04639	1.06119	1.08377	1.09526	1.08007	0.0152678
277853	Alpha-glucosidase	20.1	13	51	960	104.039	4.64014	1.04306	1.02727	1.16958	1.07997	0.217756
328037	GPN-loop GTPase 1	21.83	6	8	371	41.1252	4.80518	1.06089	1.09364	1.08501	1.07985	0.0147333
234051	ATPase family AAA domain-containing protein 3B	12.18	1	2	197	22.3496	5.31299	1.03697	1.09406	1.10804	1.07969	0.067027
283716	L-carnitine dehydrogenase	10.26	2	2	195	21.526	6.53662	1.07459	1.10822	1.05605	1.07962	0.0348594
232636	Protein MNN4	15.86	3	3	227	26.802	6.11279	1.00988	1.12407	1.10429	1.07941	0.152943
227263	Heat shock factor protein 2	3.17	2	2	662	72.9887	6.21436	1.01095	1.12795	1.09933	1.07941	0.152818
240965	Uncharacterized protein C25H2.10c	13.11	4	4	305	33.511	7.13721	1.07659	1.04504	1.11639	1.07934	0.061516
328784	DnaJ homolog 1, mitochondrial	21.43	8	12	462	47.6454	8.6167	1.08671	1.07359	1.07721	1.07917	0.00243023
334441	--	6.55	2	2	290	31.5984	7.41553	1.07546	1.04178	1.12017	1.07914	0.0733597
107857	--	31.8	15	18	434	49.2983	6.1001	1.08714	1.10788	1.04233	1.07912	0.0548994
326028	Uncharacterized protein C57A7.05	0.97	1	1	1137	126.634	6.52197	1.06431	0.967024	1.20589	1.07908	0.372322
330295	Heavy metal tolerance protein	13.49	10	10	793	88.413	8.42627	1.10615	1.03245	1.09864	1.07908	0.0776137
351896	Transcriptional regulatory protein pro1	2.15	1	1	698	77.8522	6.81494	1.12635	1.03443	1.07641	1.07906	0.0968056
333815	Uncharacterized protein C16H5.12c	47.68	24	54	667	70.8617	9.02686	1.09542	1.06785	1.07368	1.07898	0.0110992
106874	--	3.5	1	1	286	31.1866	10.2573	1.0593	1.10309	1.07446	1.07895	0.0254463
354810	--	14.4	5	5	389	42.6683	5.33838	1.08539	1.07624	1.07501	1.07888	0.0017199
282199	Probable eukaryotic translation initiation factor 2 subunit beta	52.84	15	29	282	30.8799	8.49951	1.10714	1.07664	1.05253	1.07877	0.0379633
346901	--	1.87	1	1	803	92.4962	9.27588	1.0585	1.17062	1.00696	1.07869	0.244887
331175	--	3.96	1	1	202	22.4875	5.96045	0.813033	1.32266	1.10036	1.07868	0.647099
349407	Probable mannosyltransferase KTR4	21.37	8	10	393	46.4305	6.58057	1.09392	1.08047	1.06151	1.07863	0.0139923
226954	mRNA cleavage and polyadenylation specificity factor complex subunit pta1	5.6	4	5	697	77.2574	7.57666	1.1227	1.07733	1.03571	1.07858	0.0887946
321153	Splicing factor U2AF 23 kDa subunit	35.96	5	5	178	20.6185	6.1001	1.11229	1.10231	1.02107	1.07856	0.112787
272012	Ubiquitin-conjugating enzyme E2-18 kDa	21.85	2	2	151	16.8833	4.84326	1.06423	1.12945	1.04178	1.07849	0.0962803
326112	Microsomal signal peptidase subunit 3	27.19	7	9	228	25.0882	9.71533	1.10758	1.05821	1.06956	1.07845	0.034353
275164	1-phosphatidylinositol phosphodiesterase	3.86	1	1	337	36.6904	4.91943	1.07024	1.10235	1.06189	1.07816	0.0240023
237288	DNA-(apurinic or apyrimidinic site) lyase 2	4.01	2	3	623	68.4464	7.75244	0.943811	1.14781	1.14257	1.07807	0.364942
225412	Chitin synthase 6	24.72	36	50	1776	196.816	5.45264	1.11078	1.04946	1.07203	1.07742	0.0495498
228243	Fumonisin B1 esterase	6.71	3	3	477	52.7968	5.85889	1.06053	1.12424	1.04716	1.07731	0.0829977
228620	Putative D-lactate dehydrogenase C713.03, mitochondrial	28.31	11	19	498	55.0597	5.24951	1.06876	1.0799	1.08319	1.07729	0.00317862
238344	Protein MAK11	15.4	6	6	500	53.4634	7.04932	1.05131	1.11261	1.06786	1.07726	0.0518349
18167	--	4.74	1	1	232	25.8883	7.23975	1.07549	1.06122	1.094	1.0769	0.0148881
325130	DNA damage tolerance protein RHC31	13.84	7	9	542	58.1689	5.07178	1.11305	1.01077	1.10684	1.07689	0.145893
221439	Protein QA-X	14.97	5	6	334	36.2872	5.46533	1.09052	1.05297	1.08701	1.07684	0.0234438
222511	--	16.95	3	3	236	27.3078	7.03467	1.13254	1.04855	1.04872	1.0766	0.111469
215356	Proteasome activator complex subunit 4	10.78	20	22	1929	218.645	6.69775	1.08781	1.05443	1.08726	1.0765	0.0201789
330672	Maintenance of telomere capping protein 1	31.92	16	26	520	55.2038	5.38916	1.1022	1.05511	1.0719	1.0764	0.0310182
244559	Uncharacterized protein C1840.09	29.9	8	12	301	32.3546	8.67529	1.06658	1.07059	1.09148	1.07622	0.010098
215493	Vacuolar protein sorting/targeting protein 10	34.11	42	59	1510	169.15	5.24951	1.11927	1.04977	1.0596	1.07621	0.0724701
355823	Protein AFG1	3.28	1	1	366	41.756	6.30322	0.866781	1.29502	1.06636	1.07605	0.601354
218397	AP-3 complex subunit mu	7.76	4	4	541	57.7248	6.1001	1.10117	1.02793	1.09892	1.07601	0.087202
335766	Ribosome biogenesis protein RLP24	8.17	1	1	208	24.3835	9.24658	1.00732	1.13707	1.08335	1.07591	0.181241
260193	Heat shock 70 kDa protein 12A	25.37	16	22	615	67.9076	6.7124	1.11269	1.02642	1.08843	1.07585	0.098107
219119	Succinate-semialdehyde dehydrogenase, mitochondrial	6.79	3	3	501	53.7494	6.80029	1.06816	1.05386	1.10531	1.07577	0.0385976
90482	Serine/threonine-protein phosphatase PP-X isozyme 1	2.74	1	1	365	40.52	5.37646	1.15529	1.04017	1.03143	1.07563	0.198578
330093	Vesicular-fusion protein sec18	46.64	29	53	819	90.0264	6.58057	1.09296	1.07134	1.06255	1.07561	0.0139788
349265	Pre-mRNA-splicing factor cwc15	17.2	4	5	250	28.2207	5.07178	1.08128	1.16764	0.977876	1.0756	0.302078
335739	--	6.58	1	1	152	15.5042	10.0522	1.06362	1.17187	0.990906	1.07547	0.287649
346995	--	13.1	8	8	870	94.4844	5.38916	1.07213	1.09502	1.05906	1.0754	0.0188686
240041	60S ribosomal protein L3	39.43	17	81	388	44.0925	10.1255	0.963168	1.14986	1.11302	1.07535	0.31771
358223	Guanine nucleotide-binding protein alpha-2 subunit	20.9	6	8	354	41.526	6.16357	1.09605	1.08813	1.04158	1.07525	0.0473808
222283	Kynurenine formamidase	12.71	3	3	291	31.2716	5.74463	1.07807	1.03152	1.11535	1.07498	0.09061
222487	DNA polymerase epsilon subunit D	11.02	3	5	236	25.543	4.33545	1.05478	1.05579	1.11428	1.07495	0.0624836
339864	Probable isoaspartyl peptidase/L-asparaginase 3	3.3	1	1	333	35.1248	4.95752	1.13821	1.04326	1.04337	1.07494	0.141337
226140	Pro-apoptotic serine protease NMA111	20.42	14	18	1009	111.711	5.97314	1.07941	1.07124	1.07315	1.0746	0.00109243
226378	Transcription factor BYE1	13.64	9	15	799	87.2499	7.03467	1.07279	1.04896	1.10189	1.07454	0.0396573
343933	--	9.94	2	2	322	36.7766	5.04639	0.895352	1.24619	1.08205	1.07453	0.538651
220923	--	6.16	2	2	292	32.5137	6.13818	1.02859	1.12021	1.07476	1.07452	0.106265
102090	--	92.41	7	74	79	8.29418	4.71631	0.989513	1.14219	1.09166	1.07446	0.239171
223284	Putative magnesium-dependent phosphatase P8B7.31	7.73	1	1	220	24.3996	8.71924	1.04111	1.20858	0.973513	1.0744	0.398477
283766	Sorting nexin-3	49.3	7	14	142	16.6905	8.74854	1.0522	1.10058	1.07001	1.07426	0.0343299
218776	N(6)-hydroxylysine O-acetyltransferase	10.77	6	8	520	58.0531	9.15869	1.10662	1.03544	1.08026	1.07411	0.070396
218347	--	2.92	2	2	548	60.653	6.75635	1.06142	1.0966	1.06413	1.07405	0.022507
262055	AP-1 complex subunit beta-1	30.31	21	29	749	81.6521	5.13525	1.07293	1.06161	1.08701	1.07385	0.00975375
293583	Alanine racemase TOXG	79.17	24	140	384	41.7175	6.66846	1.0878	1.06184	1.07165	1.07376	0.0103624
342335	--	3.16	2	3	665	71.3158	6.771	1.04567	1.05123	1.12429	1.07373	0.100534
217062	DNA replication licensing factor mcm5	29.63	16	26	702	78.2654	7.03467	1.0815	1.05715	1.08247	1.07371	0.0123914
233597	LOG family protein YJL055W	9.46	1	1	222	23.4139	5.57959	1.1215	1.10337	0.995832	1.07357	0.201502
245175	NADP-dependent malic enzyme	24.59	1	15	606	67.7928	6.88818	0.971468	1.1897	1.05897	1.07338	0.366708
328335	Uncharacterized peptidase C18A7.01	1.96	1	1	357	39.94	5.33838	1.10078	1.05546	1.06387	1.07337	0.0341465
106042	25S rRNA (cytosine(2870)-C(5))-methyltransferase	19.65	10	11	677	74.7847	5.64307	1.07746	1.08279	1.0593	1.07318	0.00931076
278987	Kynureninase 1	8.33	3	3	372	41.593	6.30322	1.06657	1.02347	1.12923	1.07309	0.14027
223976	Oligoribonuclease, mitochondrial	12.35	2	2	170	19.3769	6.29053	0.959836	1.24076	1.01845	1.07302	0.483346
218697	F-box protein pof7	6.55	3	3	519	58.8573	7.21045	1.10525	1.01221	1.10127	1.07291	0.138406
220504	Mitochondrial metal transporter 2	7.8	3	5	372	40.3216	7.09326	1.10373	1.04339	1.07104	1.07272	0.0529856
255741	--	9.42	4	4	467	52.1881	6.81494	1.08606	1.0241	1.10726	1.07247	0.100899
219372	COP9 signalosome complex subunit 3	6.69	4	5	478	53.8361	4.93213	1.07384	1.02024	1.12311	1.0724	0.135074
351587	Serine/threonine-protein kinase srk1	2.34	1	1	256	28.3363	6.13818	0.907551	1.32206	0.986739	1.07212	0.627497
219672	Bifunctional polynucleotide phosphatase/kinase	2.2	1	1	455	51.3712	9.1001	1.07664	1.10099	1.03863	1.07209	0.0579114
331295	--	64.48	141	539	2382	263.701	7.75244	1.10653	1.03071	1.07862	1.07195	0.0830586
226968	Uncharacterized RNA-binding protein C902.04	8.77	5	7	764	83.055	5.98584	1.05684	1.03043	1.12833	1.07187	0.133266
330087	Cell wall alpha-1,3-glucan synthase ags1	0.94	2	3	2347	259.411	5.65576	1.10696	1.05763	1.051	1.07186	0.0553785
278568	Protein sgm1	5.04	3	3	635	71.1388	5.66846	0.982582	1.16048	1.07248	1.07185	0.296735
219280	Probable alanine aminotransferase, mitochondrial	42.18	17	38	486	53.3521	5.79541	1.09452	1.08439	1.03663	1.07185	0.0565268
244847	Hsp70 nucleotide exchange factor FES1	13.18	3	3	220	23.81	4.729	1.07074	1.04741	1.09735	1.07183	0.0380434
327448	Peroxisomal biogenesis factor 6	1.32	2	2	1440	154.89	5.97314	1.07018	1.04058	1.10464	1.0718	0.0604926
345668	Uncharacterized protein C216.01c	5.6	5	5	857	97.1799	5.26221	1.04835	1.08931	1.07735	1.07167	0.0276032
234541	--	9.02	1	1	133	14.3472	8.32373	1.1089	1.0975	1.00851	1.07164	0.152582
338409	--	11.5	5	9	374	40.4643	9.92041	1.03223	1.08277	1.09907	1.07135	0.0711402
353825	Protein transport protein SEC23	38.37	2	40	774	86.2271	6.11279	1.07893	1.09748	1.03759	1.07133	0.0564083
241448	Abhydrolase domain-containing protein IMO32	31.76	6	8	255	28.2897	6.87354	1.06245	1.09872	1.05259	1.07125	0.036618
216232	DNA mismatch repair protein msh-2	12.92	10	12	921	103.281	6.21436	1.0606	1.06958	1.08339	1.07119	0.00855628
249628	--	59.26	18	47	378	43.6028	6.25244	1.07909	1.06243	1.07196	1.07116	0.004567
220474	Probable glucan endo-1,3-beta-glucosidase eglC	19.46	5	10	406	41.2066	4.24658	0.945896	1.0055	1.26168	1.07102	0.53973
339843	Lipase 1	2.08	1	1	529	58.2082	5.46533	1.05671	1.12287	1.0334	1.07099	0.117812
344918	Uridine nucleosidase	11.53	2	10	772	83.0445	5.10986	1.03783	1.0829	1.09181	1.07085	0.0513589
256736	Lariat debranching enzyme	13.73	6	9	590	63.6195	5.66846	1.05169	1.07399	1.08658	1.07075	0.0201656
220113	Diaminopropionate ammonia-lyase	9.78	3	4	358	38.7505	5.94775	1.1086	1.04125	1.06225	1.0707	0.0708637
280513	MutS protein homolog 1	1.69	1	2	947	103.992	6.65381	0.913569	0.83515	1.46308	1.0706	0.754989
329744	--	43.64	5	10	165	17.8648	4.81787	1.00774	1.1311	1.07256	1.07047	0.186554
348568	Transport protein particle subunit trs31	10.67	2	2	225	24.945	8.96826	1.08289	1.03524	1.09312	1.07042	0.0585648
244999	Ribosome-interacting GTPase 1	52.45	16	23	368	40.3752	8.33838	1.10451	1.05475	1.05185	1.07037	0.0542229
349786	Putative ATP-dependent RNA helicase C550.03c	14.35	17	20	1275	142.579	6.20166	1.09623	1.05089	1.06366	1.07026	0.0349759
105572	Mitochondrial respiratory chain complexes assembly protein YTA12	30.17	22	35	895	98.7615	6.99072	1.09196	1.04616	1.07263	1.07025	0.0339021
81353	Protein SPA2	2.87	2	2	836	92.6682	5.41455	1.00768	1.14093	1.06193	1.07018	0.211353
224272	Pre-mRNA-splicing factor cwf14	23.73	2	3	118	13.8007	8.22119	1.13205	0.981232	1.09668	1.06999	0.264128
356074	--	11.31	2	2	327	33.1171	4.70361	0.957662	1.16843	1.08376	1.06995	0.371634
234691	DNA-directed RNA polymerase II subunit RPB11	26.79	3	4	112	12.8526	7.56201	1.07322	1.07203	1.0645	1.06992	0.00152083
278772	Ribosomal lysine N-methyltransferase set11	2.94	1	1	374	42.4557	7.09326	1.09295	1.10182	1.01464	1.0698	0.127938
238925	Serine/threonine-protein phosphatase 2A activator 1	9.52	4	4	462	50.1917	6.22705	1.03491	1.05766	1.11673	1.06977	0.103521
260416	Tip elongation aberrant protein 1	17.99	21	27	1484	160.955	6.91748	1.05652	1.06856	1.08416	1.06975	0.012906
341673	--	6.3	2	2	365	37.8056	8.20654	1.06718	1.09543	1.04653	1.06971	0.0389354
226526	Glycerol-3-phosphate acyltransferase	1.76	1	2	852	94.5579	9.40771	1.15649	0.999115	1.05352	1.06971	0.269994
268982	ATP-dependent bile acid permease	8.36	11	13	1435	158.124	6.55127	1.08629	1.02306	1.09957	1.06964	0.0982304
271325	--	2.21	1	1	362	40.4396	7.06396	0.907713	1.1843	1.11673	1.06958	0.491219
249659	3-phytase A	8.24	3	4	510	56.5524	5.021	0.985939	1.09222	1.13054	1.06957	0.249012
258912	Proteasomal ubiquitin receptor ADRM1	24.23	7	14	392	41.5616	4.86865	1.06902	1.16867	0.970858	1.06952	0.34762
232389	--	64.19	15	37	310	34.4307	5.64307	1.09766	1.09617	1.01443	1.06942	0.127575
236902	Uncharacterized RNA-binding protein C57A7.13	2.31	2	2	693	77.1034	9.30518	1.06484	1.06849	1.07457	1.0693	0.0016713
333589	Probable drug/proton antiporter YHK8	1.32	1	1	608	67.4297	6.75635	1.41299	0.820275	0.974536	1.06927	0.734056
255570	RuvB-like helicase 1	52.74	18	35	457	49.478	6.39209	1.05058	1.09444	1.06266	1.06922	0.0338953
105367	--	2.34	1	1	470	49.4988	5.80811	1.00785	0.951375	1.24824	1.06916	0.526704
226456	GTP-binding protein 2	1.09	1	1	826	89.699	5.31299	1.11821	0.937585	1.15146	1.06908	0.407676
350808	--	1.6	1	1	748	79.1609	6.90283	1.00771	1.11876	1.08069	1.06906	0.168176
236881	Nucleoporin NUP37	5.83	3	6	737	79.2569	5.36377	1.12649	1.07655	1.00396	1.069	0.191949
223793	--	8.7	1	1	184	20.6557	5.10986	0.867711	1.13461	1.20466	1.06899	0.570756
252173	Uncharacterized protein RSN1	21.87	16	22	855	95.3602	9.0708	1.11588	1.03803	1.05306	1.06899	0.101578
67505	Noranthrone synthase	3.01	1	4	365	40.9126	7.32764	0.9939	1.00522	1.20764	1.06892	0.425531
222229	S-formylglutathione hydrolase	64.31	16	36	269	29.6256	5.78271	1.08024	1.04383	1.08249	1.06885	0.0315534
105563	Vacuolar membrane protease	4.82	4	5	1038	114.101	5.88428	1.10932	1.04859	1.04864	1.06885	0.0765878
260143	Glutaredoxin 3	39.53	8	16	253	27.3088	4.69092	1.0392	1.09701	1.07004	1.06875	0.0542596
222187	Probable proteasome subunit alpha type-2	51.06	14	29	282	30.2698	6.03662	1.06074	1.07608	1.06903	1.06862	0.00414466
343464	26S protease regulatory subunit 4 homolog	51.25	19	40	439	48.9774	6.11279	1.07151	1.08667	1.04752	1.06857	0.0265317
227406	Amidase 1	2.27	1	2	617	65.5835	4.53857	1.02103	1.12307	1.06149	1.06853	0.147143
222668	Proteasome subunit beta type-6	28.79	8	17	264	29.0173	6.72705	1.08598	1.12178	0.997441	1.0684	0.205391
350211	NADPH-dependent 1-acyldihydroxyacetone phosphate reductase	6.11	1	1	262	29.2222	9.0415	1.09558	1.13946	0.970121	1.06839	0.310094
261788	Histone chaperone ASF1	12.42	2	3	153	17.396	4.65283	1.10605	1.0394	1.05967	1.06837	0.0741062
217384	Ubiquitin-activating enzyme E1-like	18.78	9	12	639	70.6942	5.46533	1.0569	1.07466	1.0735	1.06835	0.00697431
334850	Probable proteasome subunit beta type-4	36.77	8	17	223	24.5397	8.88037	1.05995	1.09888	1.04593	1.06825	0.0498578
231118	SVP1-like protein 2	10.34	3	3	377	40.0916	8.82178	1.09743	1.03441	1.07268	1.06818	0.0652904
341651	Cytosine deaminase	6.17	1	1	162	17.4187	5.59229	1.08629	1.13413	0.983778	1.06807	0.264597
42571	Vacuolar protein sorting-associated protein vts1	10.59	3	4	406	43.0995	4.83057	1.0873	1.08515	1.03163	1.06803	0.0647746
268535	--	37.5	3	3	72	8.2973	10.3452	1.08933	1.04333	1.07142	1.06803	0.036611
231448	Acetylesterase	6.01	1	1	233	25.6627	5.12256	1.16111	1.0693	0.973543	1.06798	0.336115
227498	DNA polymerase alpha-associated DNA helicase A	1.48	1	1	542	60.2566	6.96143	1.02114	1.08285	1.09963	1.06787	0.104581
256296	UPF0061 protein C20G4.05c	17.41	8	9	632	71.0939	5.45264	1.06212	1.08768	1.05372	1.06784	0.0219212
226304	F-box protein pof6	2.28	2	2	921	102.861	6.23975	1.0141	1.09587	1.09324	1.06774	0.127553
225833	Cell division control protein 25	13.91	12	15	1136	127.604	5.14795	1.10088	1.01629	1.08578	1.06765	0.121768
325275	Uncharacterized protein L728	0.88	1	2	792	89.8387	5.84619	1.06739	1.0533	1.08213	1.06761	0.0148187
258304	Copper-transporting ATPase 2	2.68	2	4	1157	122.412	5.5415	0.921574	1.10748	1.17369	1.06758	0.464999
226465	ERAD-associated E3 ubiquitin-protein ligase HRD1	8.54	6	7	773	85.4396	7.03467	1.02518	1.05505	1.12246	1.06756	0.143339
42468	--	32.86	25	47	983	105.565	5.80811	1.05809	1.07292	1.07155	1.06752	0.00487473
331469	Ribosome quality control complex subunit 2	21.68	22	32	1070	117.826	5.57959	1.10334	1.04139	1.05738	1.06737	0.0682625
251602	Chitin synthase 8	21.36	33	47	1868	206.789	6.91748	1.13481	1.01377	1.05338	1.06732	0.199409
227105	--	16.22	7	11	592	68.6268	5.66846	1.10163	1.02915	1.07074	1.06717	0.0853958
217491	ENTH domain-containing protein C19F8.03c	6.31	3	3	586	64.3589	9.0415	1.07447	1.08403	1.04182	1.06677	0.0347239
229375	DNA primase small subunit	11.61	5	6	465	53.501	6.50732	1.11091	1.03974	1.0487	1.06645	0.0971742
107405	Phosphatidylinositol transfer protein SFH5	49.74	17	42	384	41.3821	5.10986	1.06776	1.05331	1.07803	1.06637	0.01147
240316	--	2.14	1	1	373	41.8615	5.92236	0.98097	1.15342	1.06387	1.06609	0.315685
223376	ADP-ribosylation factor-like protein 3	12.26	2	2	212	23.8654	6.63916	1.04578	1.03707	1.11538	1.06608	0.116541
219039	O-glycoside alpha-1,2-mannosyltransferase homolog 4	29.22	13	18	510	58.7654	6.55127	1.07834	1.05533	1.06438	1.06602	0.0101208
236633	Neutral ceramidase	5.17	3	3	716	77.5576	6.0874	1.02913	1.06472	1.10338	1.06574	0.0919276
236713	RNA polymerase II subunit A C-terminal domain phosphatase	16.81	10	12	791	87.8904	4.69092	1.02497	1.11474	1.05746	1.06572	0.129237
331073	Probable serine/threonine-protein kinase iksA	7.15	5	5	713	80.0613	7.54736	1.07907	1.04966	1.06817	1.06563	0.0166768
351077	Far upstream element-binding protein 1	29.53	14	21	579	61.3454	8.99756	1.03478	1.10793	1.05379	1.0655	0.0960812
218816	Chromatin structure-remodeling complex subunit rsc7	18.48	10	10	514	57.6298	6.22705	1.06861	1.05009	1.07771	1.06547	0.0150676
233897	Signal peptidase complex subunit SPC2	33.15	5	9	178	19.7712	8.52881	1.05502	1.08409	1.05717	1.06543	0.019832
245175	NADP-dependent malic enzyme	22.19	1	14	649	72.3291	8.27979	1.09015	1.03308	1.0729	1.06537	0.0607947
244740	--	24.96	14	25	561	60.7072	6.66846	1.09351	1.04052	1.06158	1.0652	0.0515298
334556	Putative uncharacterized hydrolase YOR131C	11.89	2	4	227	24.8297	5.50342	1.07796	1.05816	1.05937	1.06516	0.00953412
334980	--	18.1	5	9	442	45.4416	5.92236	1.04053	1.07623	1.07848	1.06508	0.033873
106480	Uncharacterized protein C354.08c	3.57	2	3	756	85.0864	9.56885	1.06014	1.04947	1.085	1.06487	0.0253299
260502	Uncharacterized oxidoreductase YjhC	6.58	2	3	532	58.8444	6.94678	1.03605	1.10039	1.05813	1.06486	0.0752624
353453	Tubulin gamma chain	8.27	3	3	423	47.1036	5.87158	1.07127	1.01336	1.10988	1.06484	0.146961
11121	Peregrin	2.21	3	4	1132	124.951	6.39209	1.09244	1.05275	1.04895	1.06471	0.0432167
215593	Regulator of V-ATPase in vacuolar membrane protein 1	2.93	3	3	1229	138.872	6.50732	1.13202	1.00231	1.0593	1.06454	0.227654
47584	--	6.47	1	3	232	24.9168	5.13525	0.933599	1.22775	1.03209	1.06448	0.533481
323532	--	44.55	18	35	303	33.6784	10.4771	1.06188	1.04818	1.08311	1.06439	0.0240024
351988	--	2.62	10	11	5148	559.655	4.79248	1.08673	1.05539	1.05103	1.06438	0.0291757
108938	Protein sip-5	5.36	4	5	933	98.4469	6.07471	1.04015	1.07899	1.07288	1.06401	0.0337082
273510	3-hydroxybenzoate 4-monooxygenase	44.89	29	54	695	76.9828	5.92236	1.06792	1.05956	1.06447	1.06398	0.00143366
321325	--	25.82	4	5	182	20.7621	4.88135	1.0626	1.10155	1.02738	1.06384	0.0965251
234091	Adrenodoxin homolog, mitochondrial	18.52	2	5	135	14.8572	4.67822	1.04513	1.07136	1.07495	1.06381	0.0210118
327987	TPR repeat-containing protein C19B12.01	26.38	53	72	2506	265.97	5.75732	1.06534	1.07809	1.04781	1.06375	0.0184404
217591	Fatty acid amide hydrolase	6.89	4	5	610	66.7998	6.49365	1.0751	1.05764	1.0584	1.06371	0.00790293
335169	Serine-threonine kinase receptor-associated protein	36.8	11	17	337	37.5535	6.75635	1.09503	1.06365	1.0316	1.06343	0.0741874
273118	Putative histone deacetylase complex subunit cti6	6.54	2	2	382	42.5529	7.44482	1.06442	1.03133	1.09435	1.06337	0.0735232
273552	--	1.65	1	1	607	68.9967	6.50732	1.07131	1.06337	1.05531	1.06333	0.00528034
334035	Chanoclavine-I aldehyde reductase	65.47	22	45	391	43.7271	5.90967	1.07136	1.04873	1.06983	1.06331	0.0130406
338535	Mitochondria fission 1 protein	63.64	10	18	154	17.21	8.646	1.06805	1.08498	1.03535	1.06279	0.0498253
218259	SET domain and MYND-type zinc finger protein 6	20	8	8	515	57.5543	7.97217	1.10823	1.02256	1.05745	1.06275	0.127696
330525	Histone deacetylase RPD3	14.07	7	8	668	73.8361	4.60205	1.04856	1.10011	1.03953	1.06273	0.0797856
252563	Mannan polymerase II complex ANP1 subunit	13.88	6	8	490	56.0409	5.79541	1.02622	1.02805	1.1336	1.06262	0.219716
327503	Cytidine deaminase	23.33	4	8	150	16.3913	6.88818	1.06996	1.02521	1.0926	1.06259	0.0871778
277142	60S ribosomal protein L15	43.88	9	26	196	22.9996	11.1362	0.962689	1.12496	1.09974	1.06246	0.341033
102031	--	80.69	17	77	290	31.4912	5.33838	1.0854	1.05488	1.04705	1.06244	0.0333525
222533	Probable proteasome subunit beta type-2	16.61	5	12	271	29.0597	7.56201	1.10555	1.05938	1.02221	1.06238	0.12248
236848	Pumilio domain-containing protein C6G9.14	3.53	2	3	679	73.9868	7.09326	1.06946	1.08713	1.03014	1.06224	0.0660472
15900	3-hydroxybenzoate 6-hydroxylase	3.16	1	1	412	45.1362	5.45264	0.963519	1.19686	1.02506	1.06181	0.469385
331398	Protein CMS1	24.57	6	7	289	32.143	9.65674	1.08829	1.09454	1.0011	1.06131	0.179111
222546	INO80 complex subunit 4	8.73	2	3	252	26.1453	9.45166	1.05225	1.08053	1.05095	1.06124	0.0239481
226459	Serine/threonine-protein kinase STE11	8.27	7	8	871	96.8107	8.23584	1.09605	1.02342	1.064	1.06116	0.100588
276131	--	10.83	8	10	803	86.6953	6.75635	1.01294	1.07468	1.09563	1.06108	0.132951
263451	Peptidase M20 domain-containing protein SMAC_03666.2	27.3	7	13	370	39.6658	5.08447	1.05214	1.07435	1.05664	1.06105	0.0121053
278114	--	2.13	1	1	328	36.437	5.30029	1.13599	0.927868	1.11921	1.06102	0.457137
239836	Extracellular exo-alpha-(1->5)-L-arabinofuranosidase	6.99	2	4	386	43.4558	5.36377	0.996405	1.15816	1.02832	1.06096	0.343003
236957	Transcription factor tau subunit sfc6	1.97	1	1	712	78.9791	7.12256	1.1062	1.06797	1.00855	1.0609	0.16527
232877	17-beta-hydroxysteroid dehydrogenase 14	7.47	2	2	281	30.5203	5.22412	1.09401	1.03802	1.05048	1.06084	0.0697867
215698	Ribosomal RNA-processing protein 12	3.98	4	6	1231	134.81	6.50732	0.989823	1.11047	1.08209	1.06079	0.237005
217188	SWI/SNF and RSC complexes subunit ssr2	45.35	26	47	677	73.7994	5.07178	1.04595	1.06103	1.07528	1.06076	0.0188755
74842	--	3.42	1	1	351	39.5402	4.80518	1.02421	1.16467	0.993172	1.06068	0.369036
325810	Importin beta-like protein kap111	1.24	1	1	884	99.1201	4.97021	1.09057	1.05647	1.03404	1.06036	0.0668036
220431	Protein LTV1	3.77	1	1	398	44.8445	4.71631	1.12237	1.03208	1.02657	1.06034	0.191471
101729	Syntaxin PEP12	29.52	7	15	271	30.6147	4.99561	1.06809	1.09055	1.02198	1.06021	0.0963936
325363	UV excision repair protein rhp23	25.26	8	19	392	40.7033	4.66553	1.02466	1.08407	1.0714	1.06004	0.0798459
226769	Pre-mRNA-splicing factor cef-1	19.1	11	13	759	84.8036	6.1001	1.0855	1.11999	0.974511	1.06	0.304969
31792	E3 ubiquitin-protein ligase RNF216	2.72	1	1	257	28.9083	5.52881	0.999103	1.11582	1.065	1.05998	0.217871
71746	--	2.7	1	1	370	39.5438	9.39307	1.07617	0.950563	1.15307	1.05993	0.41674
105876	Nuclear distribution protein PAC1	18.14	8	8	463	50.4278	7.54736	1.10064	1.03171	1.04661	1.05965	0.104282
230743	Acyltransferase LovD	18.09	6	6	387	42.8549	5.38916	1.04193	1.09767	1.03851	1.05937	0.0904201
329756	Replication factor C subunit 1	10.94	10	10	1042	114.38	8.99756	1.05204	1.04906	1.07691	1.05934	0.021428
346244	Transcriptional activator ptaB	8.1	6	9	716	77.6529	9.45166	1.08736	1.02585	1.06451	1.05924	0.0808625
350239	Protein mago nashi homolog	55.19	8	8	154	17.6291	6.94678	1.04089	1.0711	1.06462	1.05887	0.0234817
228131	Pre-mRNA-processing protein 45	19.44	8	8	571	64.0235	9.1001	1.06067	1.08179	1.03409	1.05885	0.0508405
249254	Uncharacterized AIM2 family protein C30D10.14	66.15	17	31	257	28.4512	6.23975	1.03969	1.08429	1.05251	1.05883	0.0472134
95917	Tubulin-specific chaperone E	10.72	7	8	597	66.6732	5.80811	1.01918	1.10417	1.05296	1.05877	0.140441
353062	--	2.76	2	2	689	74.613	8.646	0.949541	1.19089	1.03545	1.05863	0.493809
329103	--	4.96	2	2	423	47.7882	10.8726	1.01065	1.07549	1.08963	1.05859	0.137586
352526	Ubiquitin carboxyl-terminal hydrolase 2	7.99	9	12	1614	178.204	4.97021	1.10872	0.985319	1.08157	1.05854	0.258363
221448	Probable enoyl-CoA hydratase 2, mitochondrial	45.07	10	11	304	32.4553	7.03467	1.10256	1.0602	1.01275	1.0585	0.152795
350765	Probable kinetochore protein SPC24	4.98	1	1	201	22.4635	5.85889	1.04153	1.12542	1.00832	1.05842	0.235603
353641	Beta-catenin-like protein 1 homolog	2.5	2	2	599	66.7118	4.69092	1.0664	1.06815	1.0406	1.05838	0.0224939
248216	Probable peptide transporter ptr2	7	3	3	586	64.3658	8.04541	1.06952	0.996493	1.10896	1.05832	0.218685
219358	Poly(rC)-binding protein 1	25.77	12	19	485	51.2487	6.81494	1.06879	1.04972	1.05609	1.0582	0.00914762
349431	Striatin-interacting protein 1	8.25	4	4	909	101.817	5.24951	1.03569	1.09264	1.04626	1.05819	0.0796762
334156	--	39.92	16	27	506	54.8486	5.26221	1.05973	1.0553	1.05925	1.05809	0.000581955
227410	Calcium channel YVC1	21.54	10	16	622	70.9753	4.99561	1.07565	1.04522	1.05329	1.05805	0.023712
109460	--	7.69	1	2	195	21.9268	5.80811	0.983175	1.13007	1.06088	1.05804	0.304744
327236	--	12.75	6	8	455	51.7617	6.32861	1.06927	1.01242	1.09225	1.05798	0.134496
107161	--	30.47	4	4	233	25.4959	5.10986	1.00022	0.977032	1.19647	1.05791	0.492952
245251	Protein TOXD	49.72	16	34	354	36.4511	7.04932	1.05516	1.03506	1.08334	1.05785	0.0538853
283338	Protein transport protein sec73	2.61	3	3	1380	151.565	8.14795	1.04444	1.07567	1.05314	1.05775	0.0249913
330125	Protein SEY1	37.81	27	53	849	95.742	5.65576	1.08423	1.04212	1.0455	1.05728	0.0513585
271347	--	13.5	1	2	163	17.6922	9.87646	1.09801	1.01144	1.06221	1.05722	0.15039
281965	D-arabinose 1-dehydrogenase	12.32	4	5	414	45.2617	5.57959	1.05896	1.06743	1.0452	1.0572	0.0125863
327531	Verprolin	12.03	4	5	449	44.4231	11.7368	1.00507	1.06725	1.09874	1.05702	0.17405
226149	Morphogenesis-related protein MSB1	6.02	5	6	980	108.497	6.85889	1.0319	1.0911	1.04748	1.05683	0.0849881
226178	--	5.01	4	8	918	101.732	7.21045	1.045	1.07904	1.04638	1.05681	0.0362691
219633	Dihydrolipoyllysine-residue acetyltransferase component of pyruvate dehydrogenase complex, mitochondrial	52.81	19	59	462	49.0446	5.90967	1.05598	1.07217	1.04154	1.05656	0.023611
229836	Protein YTP1	2.88	2	2	452	49.9414	7.04932	1.05364	1.05141	1.06421	1.05642	0.00486173
223299	Autophagy-related protein 33	21.03	4	8	214	22.6447	8.41162	1.06133	1.03531	1.07257	1.0564	0.0361986
221921	--	43.63	13	27	314	35.1739	6.66846	1.01451	1.10851	1.046	1.05634	0.178232
235443	MAP kinase kinase kinase mkh1	0.55	1	1	1642	176.458	8.95361	1.06842	1.00486	1.0952	1.05616	0.170994
216212	Beta-hexosaminidase	1.76	2	2	909	98.7748	7.1958	1.11971	1.03137	1.01733	1.05614	0.221875
269213	Uncharacterized RNA-binding protein C25G10.01	32.66	10	19	346	37.0923	8.89502	1.04193	1.0566	1.06889	1.05581	0.0189468
89802	Chromatin structure-remodeling complex subunit sfh1	10.9	5	6	578	64.26	6.40479	1.03796	1.06062	1.06879	1.05579	0.0262478
104436	--	26.54	7	12	260	28.8735	6.06201	1.03377	1.11369	1.0199	1.05578	0.196514
236878	Probable kinetochore protein NDC80	6.57	4	5	731	83.6041	5.59229	1.05875	1.08432	1.02395	1.05567	0.086166
334514	Ubiquitin carboxyl-terminal hydrolase 14	30.61	17	25	771	84.8517	5.07178	1.03885	1.08183	1.0463	1.05566	0.0523438
222050	Transcription initiation factor TFIID subunit 8	3.16	1	1	253	29.337	8.90967	1.20847	0.952288	1.00598	1.05558	0.550032
235763	Putative lipase ROG1	9.88	11	13	1063	115.977	6.72705	1.11755	0.971301	1.07713	1.05533	0.332171
350443	Transmembrane 9 superfamily member 7	11.33	3	3	353	38.0266	5.07178	1.00769	1.10541	1.05286	1.05532	0.189177
238357	Protein SDS23	12.71	5	9	480	51.3146	7.34229	1.08598	1.05911	1.02056	1.05522	0.100698
240600	--	28.77	7	10	351	37.7334	6.75635	1.05864	1.01443	1.09251	1.05519	0.134684
223716	ADP-ribosylation factor 6	40.86	5	10	186	20.888	9.27588	1.05118	1.02242	1.09122	1.05494	0.110431
268526	Replication factor A protein 1	40.04	23	54	567	63.3453	6.06201	1.07684	1.01575	1.07203	1.05488	0.107521
263440	Nuclear envelope morphology protein 1	4.13	2	2	508	56.0462	8.45557	1.07714	1.03102	1.05621	1.05479	0.0544386
239905	Cytochrome c mitochondrial import factor CYC2	9.73	3	3	298	32.5585	7.7085	1.09359	0.987551	1.08285	1.05467	0.246243
283144	--	1.59	2	2	816	89.9115	6.52197	1.04411	1.04416	1.0754	1.05456	0.0346178
107495	GTP-binding protein RHO3	17.14	3	7	210	23.3275	4.83057	1.07014	1.02858	1.06493	1.05455	0.0529049
341545	Phosphoribosylglycinamide formyltransferase	37.66	8	10	231	25.182	7.03467	1.01818	1.08017	1.06516	1.0545	0.100042
330288	Uncharacterized protein C20G4.08	15.78	20	27	1426	156.708	5.97314	1.03252	1.06051	1.07001	1.05435	0.0402943
265974	Nucleoporin NUP145	13.8	24	33	1949	205.922	5.68115	1.04456	1.05688	1.06154	1.05432	0.00858121
216158	Uncharacterized protein CTHT_0071780	4.12	4	4	947	103.184	5.59229	1.02625	1.06086	1.07577	1.0543	0.0658434
341347	Condensin complex subunit 1	10.59	12	14	1190	133.725	6.18896	1.07511	1.04402	1.0434	1.05418	0.0353861
227681	Cohesin subunit rad21	9.88	5	6	587	64.7483	4.75439	1.06358	1.06831	1.03059	1.05416	0.0447838
225618	Inositol-1,4,5-trisphosphate 5-phosphatase 1	5.15	6	6	1341	147.108	8.22119	1.08833	1.02863	1.04518	1.05405	0.0934508
267379	--	31.98	5	7	197	21.232	6.55127	1.04801	1.03069	1.0827	1.0538	0.0721528
245441	Mitochondrial nuclease	31.42	9	16	296	32.9697	8.646	1.08064	1.05166	1.02903	1.05378	0.0692273
215270	Dynein heavy chain, cytoplasmic	14.37	55	68	4315	490.329	5.88428	1.08251	1.04152	1.03721	1.05375	0.0651555
222648	Probable proteasome subunit beta type-7	42.14	10	21	280	30.7803	6.1001	1.09687	1.07646	0.98784	1.05372	0.249628
279164	Transcriptional regulatory protein moc3	10.8	1	6	611	68.7246	8.68994	1.01704	1.13117	1.01247	1.05356	0.30175
336834	Ceramide glucosyltransferase	8.25	4	5	521	58.8663	8.92432	1.06217	1.03239	1.06605	1.05354	0.0372494
228052	Acetamidase	5.88	3	3	561	60.4921	6.80029	1.013	1.08706	1.06055	1.05354	0.132068
334768	Cytokinesis protein sepH	2.63	4	4	1369	152.101	6.7124	1.08756	1.04333	1.02966	1.05351	0.0921242
273580	--	2.07	1	1	532	57.6138	9.0708	0.976708	1.1221	1.06146	1.05342	0.332716
222004	PHO85 cyclin-7	14.56	4	4	261	28.9267	6.04932	1.07069	1.03685	1.05245	1.05333	0.0320228
239374	6-hydroxynicotinate 3-monooxygenase	2.51	1	1	398	44.8697	6.26514	1.09765	1.03538	1.02682	1.05328	0.139644
329418	Uncharacterized protein YPL191C	5.96	2	2	470	51.5867	4.65283	1.09156	1.00025	1.06709	1.05297	0.191753
59613	Serine/threonine-protein kinase KIN28	16.53	4	7	357	40.2882	8.33838	1.08994	1.01845	1.05043	1.05294	0.124656
326318	Putative mevalonate kinase	10.56	7	16	1032	115.524	6.1001	1.06015	1.07731	1.02072	1.05273	0.0878665
230861	Severin	56.75	20	46	400	44.0602	5.5415	1.05643	1.06226	1.03938	1.05269	0.0165475
325853	Eukaryotic peptide chain release factor subunit 1	47.27	16	32	440	49.294	5.45264	1.05112	1.06647	1.04014	1.05258	0.0204459
342111	Protein transport protein SEC13	50.99	14	34	302	33.2123	6.27783	1.07006	1.02238	1.06518	1.05254	0.0740115
356162	Protein SDA1	3.91	1	1	358	39.5544	8.32373	1.05982	1.012	1.08579	1.05254	0.135604
247382	Tetratricopeptide repeat protein 1	11	12	16	1209	136.778	6.32861	1.06193	1.03455	1.06106	1.05251	0.0280504
220665	26S protease regulatory subunit 8 homolog	64.1	20	42	390	43.5901	8.42627	1.08355	1.03478	1.0392	1.05251	0.0778286
218938	Eukaryotic translation initiation factor 2 subunit gamma	48.43	20	44	510	55.0981	7.82568	1.09546	1.03855	1.02266	1.05222	0.141922
272300	Probable 3-hydroxybutyryl-CoA dehydrogenase	44.04	11	16	277	29.4523	5.99854	1.06547	1.03153	1.05816	1.05172	0.0375269
345502	H/ACA ribonucleoprotein complex non-core subunit NAF1	1.27	1	1	632	67.36	4.66553	1.04313	1.01467	1.09705	1.05162	0.166129
107739	--	2.65	2	2	642	69.9742	9.68604	1.03779	1.0781	1.03851	1.05147	0.0609014
109438	Ubiquitin-conjugating enzyme E2 1	15.57	1	1	122	13.9676	4.65283	1.05491	1.16616	0.932396	1.05116	0.527694
225565	ABC transporter C family member 11	2.03	2	3	1086	118.743	5.73193	1.03505	1.07338	1.04501	1.05115	0.0468862
59944	--	28.45	4	5	232	23.4024	10.2427	1.06101	0.99534	1.09709	1.05115	0.228078
216008	116 kDa U5 small nuclear ribonucleoprotein component	28.88	21	35	973	109.061	5.14795	1.06617	1.04465	1.04252	1.05111	0.0211429
105599	Phosphoserine aminotransferase	43.36	19	31	429	46.1339	6.20166	1.06298	1.04855	1.04158	1.05104	0.0149042
215939	RNA cytidine acetyltransferase	11.14	10	13	1059	118.32	7.03467	1.04633	1.02922	1.07753	1.05103	0.0689685
338897	--	7.64	2	2	314	33.3929	5.45264	1.05342	1.04755	1.05193	1.05097	0.00118912
239326	LIN1-like protein	6.32	4	5	475	52.5625	4.83057	0.946043	1.18291	1.02368	1.05088	0.541421
226804	Nucleolar complex protein 2	3.6	3	3	777	87.1551	7.34229	1.01898	1.09237	1.04125	1.05087	0.144014
258696	Myosin-1	31.67	32	49	1219	134.448	9.5835	1.06144	1.02736	1.06341	1.05074	0.0492781
237875	Uncharacterized transporter C1529.01	1.48	1	1	542	59.1158	8.1626	1.06807	1.0482	1.03522	1.0505	0.0339546
233663	N-terminal acetyltransferase A complex catalytic subunit ard1	39.57	9	12	235	26.1494	6.90283	1.08036	1.08007	0.990942	1.05046	0.232046
219435	Beta-glucosidase 1B	4.63	2	2	475	53.9033	5.37646	1.0439	1.03707	1.07028	1.05042	0.0380317
44255	Nucleoporin NUP53	3.2	2	3	438	47.7918	6.55127	1.05478	1.01524	1.08111	1.05038	0.11914
233023	Alanine--tRNA ligase	25.78	6	11	287	30.9517	6.46826	1.02777	1.05177	1.07157	1.05037	0.0577924
225235	--	24	1	1	50	5.5937	8.19189	1.04422	1.04956	1.05725	1.05035	0.00559472
63784	Uncharacterized protein C20F10.03	10.63	4	4	414	45.0795	5.97314	1.03489	1.00833	1.10712	1.05011	0.231671
275142	Alpha-1,2-mannosyltransferase alg9	6.2	2	2	581	65.568	8.55811	1.04374	1.0648	1.04107	1.04987	0.0219078
[truncated: 2,769 more rows]

## Sheet: Key
Term	Description
Protein ID	Accession number from Cryphonectria parasitica database v2.0
Coverage	The percentage of the protein sequence covered by identified peptides
Unique Peptides	The number of peptide sequences that are unique to the protein
PSMs	The number of peptide spectrum matches
AAs	The number of amino of the identified protein
MW [kDa]	Theoretical molecular weight
calc. pI	Theoretical pI
delta cpubi4/ku80	The quantification of protein between cpubi4 and ku80, ku80 was set as reference
average delta cpubi4/ku80	The avarage quantification of protein (cpubi4/ku80) from three independent experimental data
t test p-value	Scored using Student's t-test, n=5
Regulated	The threhold change at 1.5 (p-value<0.05)
